# Supplementary material for: Histone Modifications in a Mouse Model of Early Adversities and Panic Disorder: Role for Asic1 and Neurodevelopmental Genes
Source: PubMed Central journal article supplement (PMC4848503; doi:10.1038/srep25131), 2016-04-28
Supplement: srep25131-s1.pdf [file srep25131-s1.pdf]

**Supplementary information for “Histone Modifications in a Mouse Model of Early Adversities and Panic Disorder: Role for *Asic1* and Neurodevelopmental Genes”**

Davide Cittaro, Valentina Lampis, Alessandra Luchetti, Roberto Coccorello, Alessandro Guffanti, Armando Felsani, Anna Moles, Elia Stupka, Francesca R. D’Amato and Marco Battaglia

**Figure S1:** Multiple ChIP-seq profiles at promoters of genes considered positive (A) and negative controls (B) for medulla oblongata tissue. For each gene, the expression levels in different brain sections is reported according to the Allen Brain Atlas.

ChIP-seq signal for RCF mouse

ChIP-seq signal for Control mouse

**A**

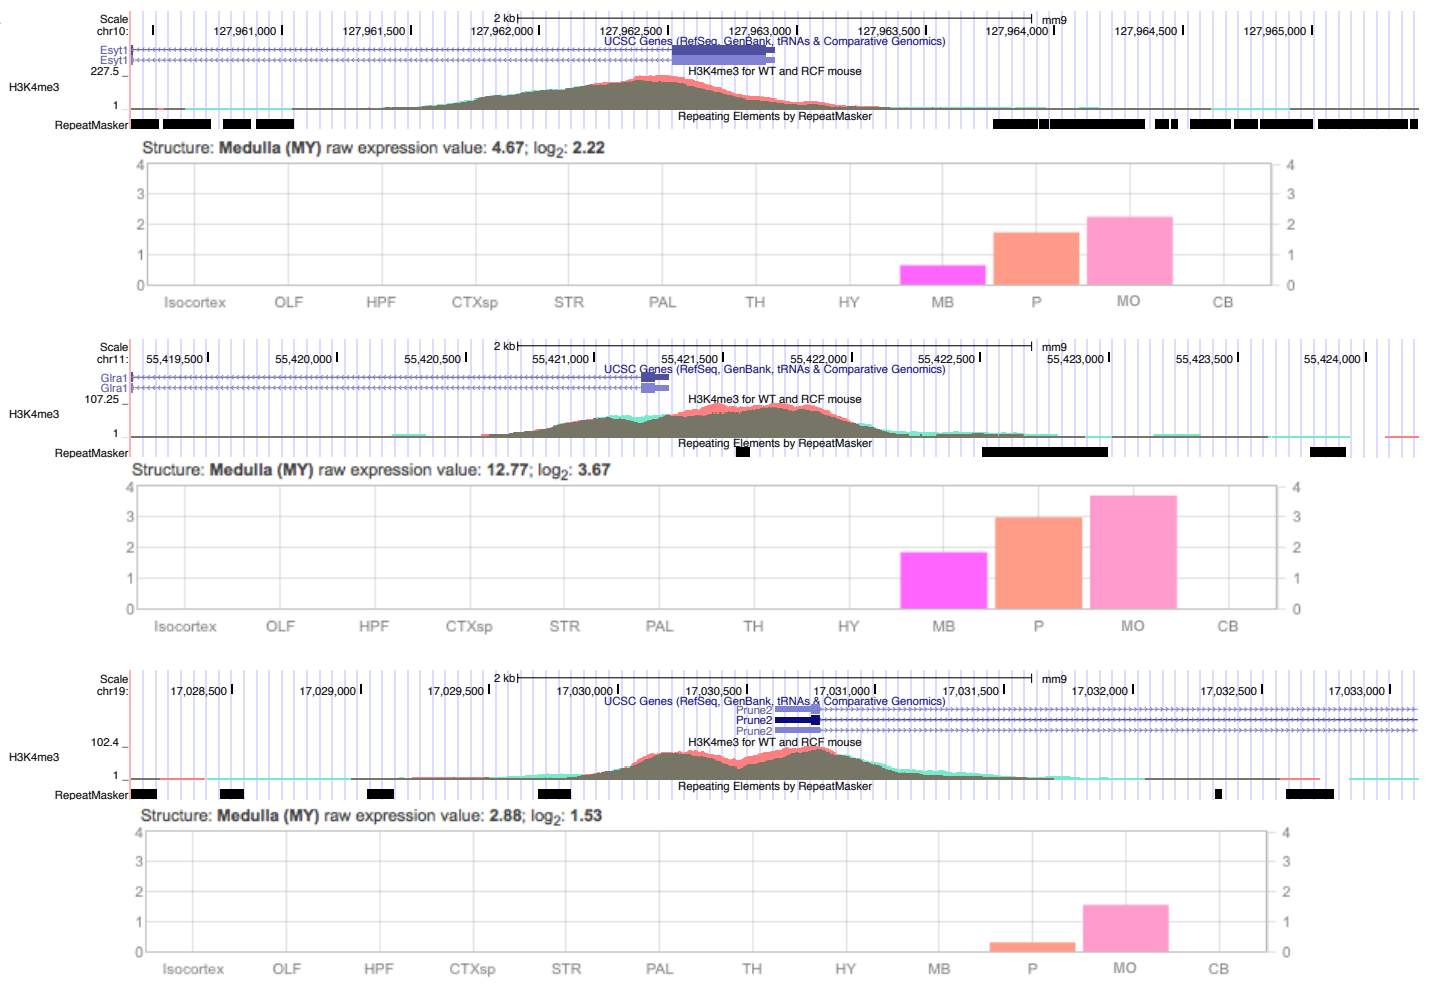

**B**

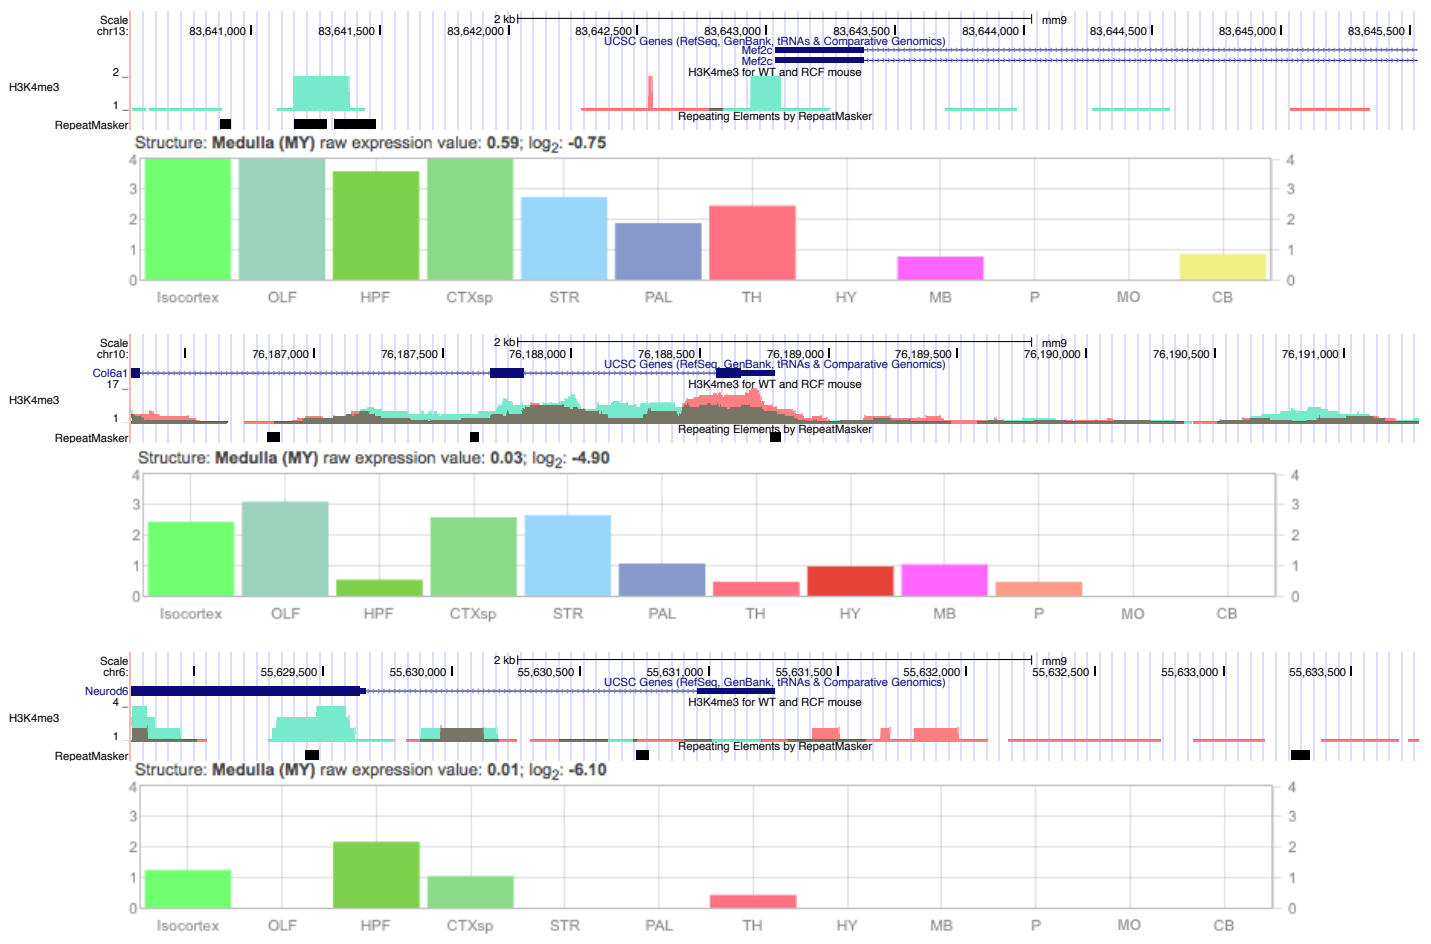

**Figure S2:** Scatterplot showing the relationship between fold change of significant peaks in all ChIP-seq experiments and the fold change of the corresponding transcript level according to SAGE. Labeled genes were simultaneously and significantly different between RCF and CT animals for enrichment at the ChIP-seq analyses and altered expression at the SAGE

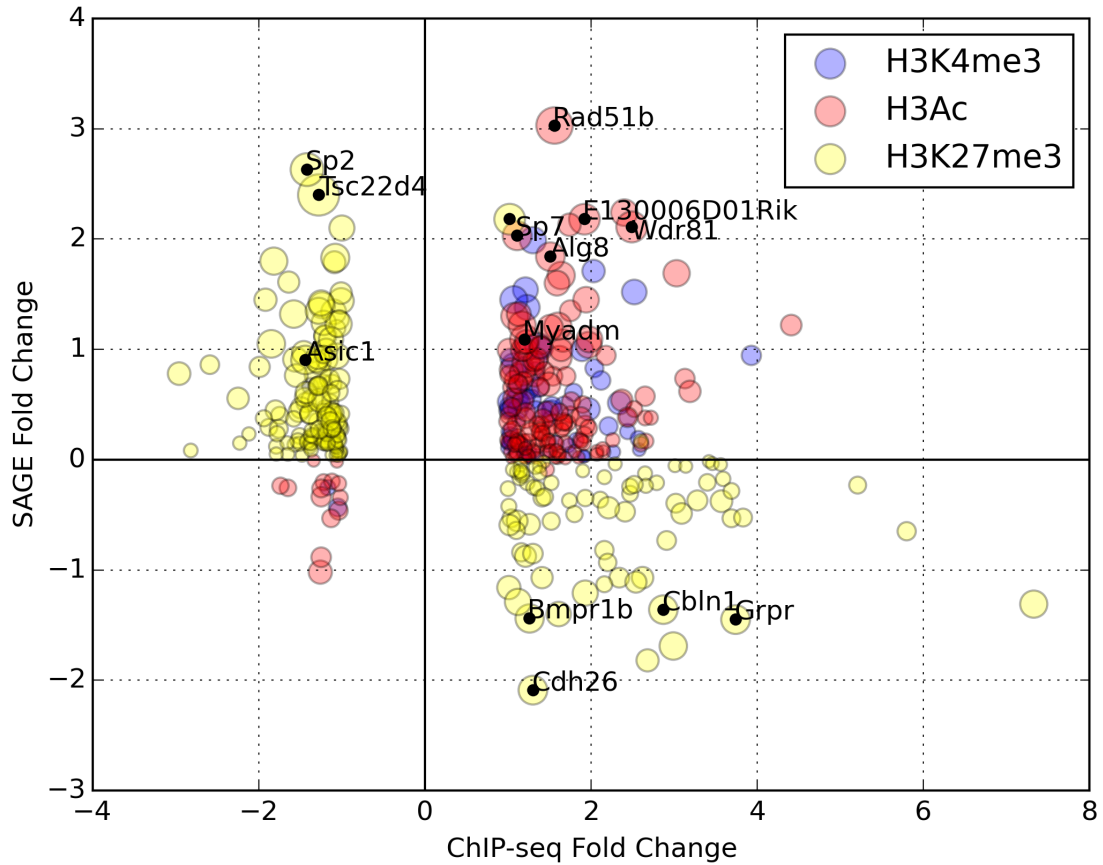

**Figure S3: Synopsis of methods employed for the epigenetic analyses**

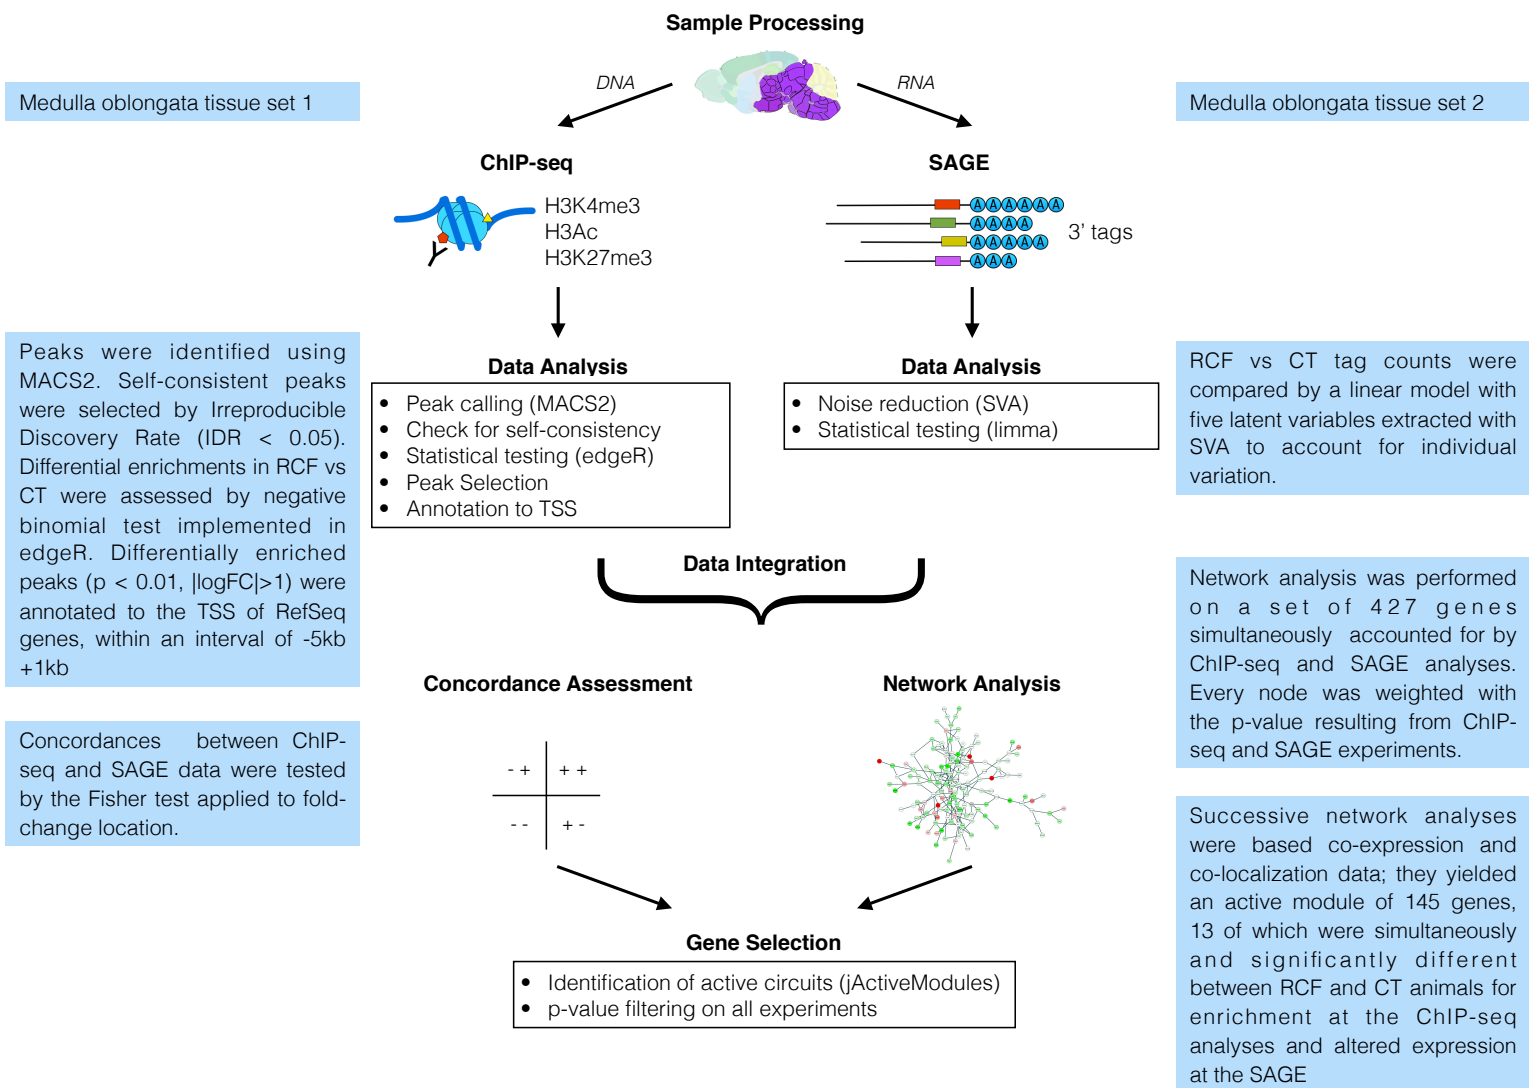

**Table S1:** Number of reads recovered for each ChIP-seq experiment

| <b>Marker</b> | <b>Condition</b> | <b>Total reads</b> |
|---------------|------------------|--------------------|
| H3Ac          | CT               | 17127549           |
| H3K27me3      | CT               | 12136204           |
| H3K4me3       | CT               | 10877097           |
| Control       | CT               | 27182302           |
| H3Ac          | RCF              | 21085548           |
| H3K27me3      | RCF              | 17818983           |
| H3K4me3       | RCF              | 12717825           |
| Control       | RCF              | 27784026           |

**Table S2:** Counts of TSS-proximal peaks (-5kb+1kb) that are significantly different in enrichment comparing RCF to CT mice.

|                 | <b>H3K4me3</b> | <b>H3Ac</b> | <b>H3K27me3</b> |
|-----------------|----------------|-------------|-----------------|
| <b>Enriched</b> | 232            | 459         | 439             |
| <b>Depleted</b> | 12             | 53          | 572             |
| <b>Total</b>    | <b>244</b>     | <b>512</b>  | <b>1011</b>     |

**Table S3:** List of genes associated with at least one significantly different peak in any ChIP-seq experiment in their TSS-proximal region when comparing RCF to CT mice.

| MGI symbol    | Entrez ID | Description                |
|---------------|-----------|----------------------------|
| 0610031J06Rik | .         | .                          |
| 0610040B10Rik | 67672     | RIKEN cDNA 0610040B10 gene |
| 0610040B10Rik | .         | .                          |
| 1600029I14Rik | 69797     | RIKEN cDNA 1600029I14 gene |
| 1700003M07Rik | 72225     | RIKEN cDNA 1700003M07 gene |
| 1700003M07Rik | .         | .                          |
| 1700011A15Rik | 66322     | RIKEN cDNA 1700011A15 gene |
| 1700012D01Rik | 72243     | RIKEN cDNA 1700012D01 gene |
| 1700019O17Rik | 71863     | RIKEN cDNA 1700019O17 gene |
| 1700021N21Rik | .         | .                          |
| 1700021N21Rik | 69409     | RIKEN cDNA 1700021N21 gene |
| 1700025G04Rik | 69399     | RIKEN cDNA 1700025G04 gene |
| 1700028D13Rik | .         | .                          |
| 1700028D13Rik | 75569     | RIKEN cDNA 1700028D13 gene |
| 1700029F12Rik | 66479     | RIKEN cDNA 1700029F12 gene |
| 1700029M20Rik | 73937     | RIKEN cDNA 1700029M20 gene |
| 1700029M20Rik | .         | .                          |
| 1700031F05Rik | 73300     | RIKEN cDNA 1700031F05 gene |
| 1700034H15Rik | 98736     | RIKEN cDNA 1700034H15 gene |
| 1700034H15Rik | .         | .                          |
| 1700044C05Rik | .         | .                          |
| 1700044C05Rik | 73306     | RIKEN cDNA 1700044C05 gene |
| 1700084C01Rik | 78465     | RIKEN cDNA 1700084C01 gene |
| 1700102P08Rik | 112418    | RIKEN cDNA 1700102P08 gene |
| 1700113H08Rik | 76640     | RIKEN cDNA 1700113H08 gene |
| 1700125G02Rik | .         | .                          |
| 1700125G02Rik | 73628     | RIKEN cDNA 1700125G02 gene |
| 1810009A15Rik | 66276     | RIKEN cDNA 1810009A15 gene |
| 1810013A23Rik | 69050     | RIKEN cDNA 1810013A23 gene |
| 1810044D09Rik | .         | .                          |
| 1810044D09Rik | 69798     | RIKEN cDNA 1810044D09 gene |
| 2310036O22Rik | 68544     | RIKEN cDNA 2310036O22 gene |
| 2310045N01Rik | 72368     | RIKEN cDNA 2310045N01 gene |
| 2410004I01Rik | .         | .                          |
| 2410004I01Rik | 69739     | RIKEN cDNA 2410004I01 gene |
| 2410016O06Rik | 71952     | RIKEN cDNA 2410016O06 gene |
| 2410124H12Rik | .         | .                          |
| 2410124H12Rik | 76785     | RIKEN cDNA 2410124H12 gene |

|                      |           |                            |
|----------------------|-----------|----------------------------|
| <b>2610002J02Rik</b> | .         | .                          |
| <b>2610028E06Rik</b> | 72395     | RIKEN cDNA 2610028E06 gene |
| <b>2610028E06Rik</b> | .         | .                          |
| <b>2610206C17Rik</b> | .         | .                          |
| <b>2610206C17Rik</b> | 72495     | RIKEN cDNA 2610206C17 gene |
| <b>2610306M01Rik</b> | 67170     | RIKEN cDNA 2610306M01 gene |
| <b>2610306M01Rik</b> | .         | .                          |
| <b>2810408I11Rik</b> | .         | .                          |
| <b>2810408I11Rik</b> | 69941     | RIKEN cDNA 2810408I11 gene |
| <b>2900076A07Rik</b> | .         | .                          |
| <b>2900076A07Rik</b> | 100504421 | RIKEN cDNA 2900076A07 gene |
| <b>3110007F17Rik</b> | .         | .                          |
| <b>3110009E18Rik</b> | 73103     | RIKEN cDNA 3110009E18 gene |
| <b>3200001D21Rik</b> | 71818     | RIKEN cDNA 3200001D21 gene |
| <b>4631405J19Rik</b> | 433456    | RIKEN cDNA 4631405J19 gene |
| <b>4631405J19Rik</b> | .         | .                          |
| <b>4732416N19Rik</b> | 320737    | RIKEN cDNA 4732416N19 gene |
| <b>4732491K20Rik</b> | .         | .                          |
| <b>4732491K20Rik</b> | 224523    | RIKEN cDNA 4732491K20 gene |
| <b>4833420G17Rik</b> | 67392     | RIKEN cDNA 4833420G17 gene |
| <b>4921504E06Rik</b> | 70909     | RIKEN cDNA 4921504E06 gene |
| <b>4921509O07Rik</b> | 70917     | RIKEN cDNA 4921509O07 gene |
| <b>4921513I03Rik</b> | .         | .                          |
| <b>4921513I03Rik</b> | 70874     | RIKEN cDNA 4921513I03 gene |
| <b>4921530L21Rik</b> | 66732     | RIKEN cDNA 4921530L21 gene |
| <b>4930413E15Rik</b> | 74627     | RIKEN cDNA 4930413E15 gene |
| <b>4930432J09Rik</b> | 73877     | RIKEN cDNA 4930432J09 gene |
| <b>4930455H04Rik</b> | .         | .                          |
| <b>4930455H04Rik</b> | 74654     | RIKEN cDNA 4930455H04 gene |
| <b>4930470P17Rik</b> | .         | .                          |
| <b>4930470P17Rik</b> | 67637     | RIKEN cDNA 4930470P17 gene |
| <b>4930471M09Rik</b> | .         | .                          |
| <b>4930471M09Rik</b> | 75787     | RIKEN cDNA 4930471M09 gene |
| <b>4930483J18Rik</b> | .         | .                          |
| <b>4930483J18Rik</b> | 67638     | RIKEN cDNA 4930483J18 gene |
| <b>4930483O08Rik</b> | 74970     | RIKEN cDNA 4930483O08 gene |
| <b>4930500F04Rik</b> | 70969     | RIKEN cDNA 4930500F04 gene |
| <b>4930519F16Rik</b> | .         | .                          |
| <b>4930519F16Rik</b> | 75106     | RIKEN cDNA 4930519F16 gene |
| <b>4930522H14Rik</b> | 67646     | RIKEN cDNA 4930522H14 gene |
| <b>4930543E12Rik</b> | 75239     | RIKEN cDNA 4930543E12 gene |
| <b>4930570G19Rik</b> | .         | .                          |
| <b>4930570G19Rik</b> | 329782    | RIKEN cDNA 4930570G19 gene |



|                      |           |                            |
|----------------------|-----------|----------------------------|
| <b>4931428F04Rik</b> | 74356     | RIKEN cDNA 4931428F04 gene |
| <b>4933406K04Rik</b> | .         | .                          |
| <b>4933406K04Rik</b> | 71033     | RIKEN cDNA 4933406K04 gene |
| <b>4933407E24Rik</b> | 108809    | RIKEN cDNA 4933407E24 gene |
| <b>4933407E24Rik</b> | .         | .                          |
| <b>4933416E03Rik</b> | .         | .                          |
| <b>4933416E03Rik</b> | 71081     | RIKEN cDNA 4933416E03 gene |
| <b>4933417O13Rik</b> | 71153     | RIKEN cDNA 4933417O13 gene |
| <b>4933417O13Rik</b> | .         | .                          |
| <b>4933428G20Rik</b> | 100141474 | RIKEN cDNA 4933428G20 gene |
| <b>4933432K03Rik</b> | 75793     | RIKEN cDNA 4933432K03 gene |
| <b>4933433G15Rik</b> | 71274     | RIKEN cDNA 4933433G15 gene |
| <b>4933433G15Rik</b> | .         | .                          |
| <b>4933434E20Rik</b> | 99650     | RIKEN cDNA 4933434E20 gene |
| <b>4933439K11Rik</b> | 71319     | RIKEN cDNA 4933439K11 gene |
| <b>4933439K11Rik</b> | .         | .                          |
| <b>5530601H04Rik</b> | 71445     | RIKEN cDNA 5530601H04 gene |
| <b>5530601H04Rik</b> | .         | .                          |
| <b>5730408K05Rik</b> | 67531     | RIKEN cDNA 5730408K05 gene |
| <b>5830416I19Rik</b> | 74757     | RIKEN cDNA 5830416I19 gene |
| <b>6030408B16Rik</b> | .         | .                          |
| <b>6030408B16Rik</b> | 77717     | RIKEN cDNA 6030408B16 gene |
| <b>6530411M01Rik</b> | .         | .                          |
| <b>6530411M01Rik</b> | 67791     | RIKEN cDNA 6530411M01 gene |
| <b>8430408G22Rik</b> | 213393    | RIKEN cDNA 8430408G22 gene |
| <b>9130023H24Rik</b> | 100043133 | RIKEN cDNA 9130023H24 gene |
| <b>9230105E05Rik</b> | .         | .                          |
| <b>9230105E05Rik</b> | 320626    | RIKEN cDNA 9230105E05 gene |
| <b>9330133O14Rik</b> | 100689703 | RIKEN cDNA 9330133O14 gene |
| <b>9330133O14Rik</b> | .         | .                          |
| <b>9430038I01Rik</b> | 77252     | RIKEN cDNA 9430038I01 gene |
| <b>9530080O11Rik</b> | .         | .                          |
| <b>9530080O11Rik</b> | 319247    | RIKEN cDNA 9530080O11 gene |
| <b>A130010J15Rik</b> | 319266    | RIKEN cDNA A130010J15 gene |
| <b>A230056J06Rik</b> | 319469    | RIKEN cDNA A230056J06 gene |
| <b>A330041J22Rik</b> | 319556    | RIKEN cDNA A330041J22 gene |
| <b>A330041J22Rik</b> | .         | .                          |
| <b>A330069E16Rik</b> | .         | .                          |
| <b>A330069E16Rik</b> | 606735    | RIKEN cDNA A330069E16 gene |
| <b>A330070K13Rik</b> | 381673    | RIKEN cDNA A330070K13 gene |
| <b>A630019I02Rik</b> | 408254    | RIKEN cDNA A630019I02 gene |
| <b>A630075F10Rik</b> | .         | .                          |
| <b>A630075F10Rik</b> | 100043910 | RIKEN cDNA A630075F10 gene |

|                      |           |                                                                   |
|----------------------|-----------|-------------------------------------------------------------------|
| <b>A730018C14Rik</b> | 100504733 | RIKEN cDNA A730018C14 gene                                        |
| <b>A730043L09Rik</b> | 330958    | RIKEN cDNA A730043L09 gene                                        |
| <b>AU015836</b>      | 385493    | expressed sequence AU015836                                       |
| <b>AU015836</b>      | .         | .                                                                 |
| <b>AU040320</b>      | 100317    | expressed sequence AU040320                                       |
| <b>Aak1</b>          | 269774    | AP2 associated kinase 1                                           |
| <b>Aanat</b>         | 11298     | arylalkylamine N-acetyltransferase                                |
| <b>Abcf3</b>         | 27406     | ATP-binding cassette, sub-family F (GCN20), member 3              |
| <b>Abhd4</b>         | 105501    | abhydrolase domain containing 4                                   |
| <b>Abi3</b>          | 66610     | ABI gene family, member 3                                         |
| <b>Acn9</b>          | .         | .                                                                 |
| <b>Aco2</b>          | 11429     | aconitase 2, mitochondrial                                        |
| <b>Acot11</b>        | 329910    | acyl-CoA thioesterase 11                                          |
| <b>Acot13</b>        | 66834     | acyl-CoA thioesterase 13                                          |
| <b>Acox3</b>         | 80911     | acyl-Coenzyme A oxidase 3, pristanoyl                             |
| <b>Actl10</b>        | 70362     | actin-like 10                                                     |
| <b>Actrt2</b>        | 73353     | actin-related protein T2                                          |
| <b>Adam11</b>        | 11488     | a disintegrin and metallopeptidase domain 11                      |
| <b>Adam33</b>        | 110751    | a disintegrin and metallopeptidase domain 33                      |
| <b>Adap1</b>         | 231821    | ArfGAP with dual PH domains 1                                     |
| <b>Add2</b>          | 11519     | adducin 2 (beta)                                                  |
| <b>Adrbk2</b>        | 320129    | adrenergic receptor kinase, beta 2                                |
| <b>Agbl2</b>         | 271813    | ATP/GTP binding protein-like 2                                    |
| <b>Agmat</b>         | 75986     | agmatine ureohydrolase (agmatinase)                               |
| <b>Ago2</b>          | 239528    | argonate RISC catalytic subunit 2                                 |
| <b>Agpat9</b>        | 231510    | 1-acylglycerol-3-phosphate O-acyltransferase 9                    |
| <b>Ahdcl1</b>        | 230793    | AT hook, DNA binding motif, containing 1                          |
| <b>Aicda</b>         | 11628     | activation-induced cytidine deaminase                             |
| <b>Ak4</b>           | 11639     | adenylate kinase 4                                                |
| <b>Akap3</b>         | 11642     | A kinase (PRKA) anchor protein 3                                  |
| <b>Akap6</b>         | 238161    | A kinase (PRKA) anchor protein 6                                  |
| <b>Akr1b10</b>       | 67861     | aldo-keto reductase family 1, member B10 (aldose reductase)       |
| <b>Akt2</b>          | 11652     | thymoma viral proto-oncogene 2                                    |
| <b>Alg13</b>         | 67574     | asparagine-linked glycosylation 13                                |
| <b>Alg8</b>          | 381903    | asparagine-linked glycosylation 8 (alpha-1,3-glucosyltransferase) |
| <b>Alkbh4</b>        | 72041     | alkB, alkylation repair homolog 4 (E. coli)                       |
| <b>Alkbh6</b>        | 233065    | alkB, alkylation repair homolog 6 (E. coli)                       |
| <b>Alpk1</b>         | 71481     | alpha-kinase 1                                                    |
| <b>Amer1</b>         | 72345     | APC membrane recruitment 1                                        |
| <b>Amn</b>           | 93835     | amnionless                                                        |
| <b>Ankrd34a</b>      | 545554    | ankyrin repeat domain 34A                                         |
| <b>Ankrd42</b>       | 73845     | ankyrin repeat domain 42                                          |
| <b>Ano2</b>          | 243634    | anoctamin 2                                                       |

|                      |        |                                                                          |
|----------------------|--------|--------------------------------------------------------------------------|
| <b>Ap1b1</b>         | 11764  | adaptor protein complex AP-1, beta 1 subunit                             |
| <b>Ap5z1</b>         | 231855 | adaptor-related protein complex 5, zeta 1 subunit                        |
| <b>Apeh</b>          | 235606 | acylpeptide hydrolase                                                    |
| <b>Apoo</b>          | 68316  | apolipoprotein O                                                         |
| <b>Apoo-ps</b>       | 621156 | apolipoprotein O, pseudogene                                             |
| <b>Apoo-ps</b>       | .      | .                                                                        |
| <b>Apool</b>         | 68117  | apolipoprotein O-like                                                    |
| <b>Aqp2</b>          | 11827  | aquaporin 2                                                              |
| <b>Arhgap26</b>      | 71302  | Rho GTPase activating protein 26                                         |
| <b>Arhgdia</b>       | 192662 | Rho GDP dissociation inhibitor (GDI) alpha                               |
| <b>Arl5c</b>         | 217151 | ADP-ribosylation factor-like 5C                                          |
| <b>Arl6ip5</b>       | 65106  | ADP-ribosylation factor-like 6 interacting protein 5                     |
| <b>Arl8a</b>         | 68724  | ADP-ribosylation factor-like 8A                                          |
| <b>Arpc5l</b>        | 74192  | actin related protein 2/3 complex, subunit 5-like                        |
| <b>Arrdc2</b>        | 70807  | arrestin domain containing 2                                             |
| <b>Arsg</b>          | 74008  | arylsulfatase G                                                          |
| <b>Asb16</b>         | 217217 | ankyrin repeat and SOCS box-containing 16                                |
| <b>Asf1b</b>         | 66929  | anti-silencing function 1B histone chaperone                             |
| <b>Asic1</b>         | 11419  | acid-sensing (proton-gated) ion channel 1                                |
| <b>Asna1</b>         | 56495  | arsA arsenite transporter, ATP-binding, homolog 1 (bacterial)            |
| <b>Asphd2</b>        | 72898  | aspartate beta-hydroxylase domain containing 2                           |
| <b>Asprv1</b>        | 67855  | aspartic peptidase, retroviral-like 1                                    |
| <b>Aste1</b>         | 66595  | asteroid homolog 1 (Drosophila)                                          |
| <b>Atf5</b>          | 107503 | activating transcription factor 5                                        |
| <b>Atg4a</b>         | 666468 | autophagy related 4A, cysteine peptidase                                 |
| <b>Atp1b1</b>        | 11931  | ATPase, Na <sup>+</sup> /K <sup>+</sup> transporting, beta 1 polypeptide |
| <b>Auts2</b>         | .      | .                                                                        |
| <b>Auts2</b>         | 319974 | autism susceptibility candidate 2                                        |
| <b>Avp</b>           | 11998  | arginine vasopressin                                                     |
| <b>Awat2</b>         | 245532 | acyl-CoA wax alcohol acyltransferase 2                                   |
| <b>B230217C12Rik</b> | 68127  | RIKEN cDNA B230217C12 gene                                               |
| <b>B3galt5</b>       | 93961  | UDP-Gal:betaGlcNAc beta 1,3-galactosyltransferase, polypeptide 5         |
| <b>B3glct</b>        | 381694 | beta-3-glucosyltransferase                                               |
| <b>B4galnt1</b>      | 14421  | beta-1,4-N-acetyl-galactosaminyl transferase 1                           |
| <b>B4galnt3</b>      | 330406 | beta-1,4-N-acetyl-galactosaminyl transferase 3                           |
| <b>B930059L03Rik</b> | 319786 | RIKEN cDNA B930059L03 gene                                               |
| <b>BC018473</b>      | 193217 | cDNA sequence BC018473                                                   |
| <b>BC018473</b>      | .      | .                                                                        |
| <b>BC029214</b>      | 227622 | cDNA sequence BC029214                                                   |
| <b>BC030867</b>      | 217216 | cDNA sequence BC030867                                                   |
| <b>BC039966</b>      | .      | .                                                                        |
| <b>BC039966</b>      | 407793 | cDNA sequence BC039966                                                   |
| <b>BC048562</b>      | 434439 | cDNA sequence BC048562                                                   |

|                      |           |                                                                                                 |
|----------------------|-----------|-------------------------------------------------------------------------------------------------|
| <b>Bach1</b>         | 12013     | BTB and CNC homology 1                                                                          |
| <b>Bag3</b>          | 29810     | BCL2-associated athanogene 3                                                                    |
| <b>Banp</b>          | 53325     | BTG3 associated nuclear protein                                                                 |
| <b>Barhl1</b>        | 54422     | BarH-like 1 (Drosophila)                                                                        |
| <b>Baz2a</b>         | 116848    | bromodomain adjacent to zinc finger domain, 2A                                                  |
| <b>Bcl6b</b>         | 12029     | B cell CLL/lymphoma 6, member B                                                                 |
| <b>Best3</b>         | 382427    | bestrophin 3                                                                                    |
| <b>Bet1</b>          | 12068     | blocked early in transport 1 homolog (S. cerevisiae)                                            |
| <b>Bhlha15</b>       | 17341     | basic helix-loop-helix family, member a15                                                       |
| <b>Bhmt</b>          | 12116     | betaine-homocysteine methyltransferase                                                          |
| <b>Bmpr1b</b>        | 12167     | bone morphogenetic protein receptor, type 1B                                                    |
| <b>Boll</b>          | 75388     | bol, boule-like (Drosophila)                                                                    |
| <b>Brd8</b>          | 78656     | bromodomain containing 8                                                                        |
| <b>Brinp2</b>        | 240843    | bone morphogenic protein/retinoic acid inducible neural-specific 2                              |
| <b>Brip1</b>         | 237911    | BRCA1 interacting protein C-terminal helicase 1                                                 |
| <b>Btaf1</b>         | 107182    | BTAf1 RNA polymerase II, B-TFIID transcription factor-associated, (Mot1 homolog, S. cerevisiae) |
| <b>Btbd11</b>        | 74007     | BTB (POZ) domain containing 11                                                                  |
| <b>Btbd18</b>        | 100270744 | BTB (POZ) domain containing 18                                                                  |
| <b>Btbd19</b>        | .         | .                                                                                               |
| <b>Btbd19</b>        | 78611     | BTB (POZ) domain containing 19                                                                  |
| <b>Btbd2</b>         | 208198    | BTB (POZ) domain containing 2                                                                   |
| <b>Btbd3</b>         | 228662    | BTB (POZ) domain containing 3                                                                   |
| <b>Bysl</b>          | 53414     | bystin-like                                                                                     |
| <b>C1ql4</b>         | 239659    | complement component 1, q subcomponent-like 4                                                   |
| <b>C1rl</b>          | 232371    | complement component 1, r subcomponent-like                                                     |
| <b>C330006A16Rik</b> | .         | .                                                                                               |
| <b>C330006A16Rik</b> | 109299    | RIKEN cDNA C330006A16 gene                                                                      |
| <b>C77080</b>        | 97130     | expressed sequence C77080                                                                       |
| <b>Cabp1</b>         | 29867     | calcium binding protein 1                                                                       |
| <b>Cacnb3</b>        | 12297     | calcium channel, voltage-dependent, beta 3 subunit                                              |
| <b>Cacng4</b>        | 54377     | calcium channel, voltage-dependent, gamma subunit 4                                             |
| <b>Cacng5</b>        | 140723    | calcium channel, voltage-dependent, gamma subunit 5                                             |
| <b>Calca</b>         | 12310     | calcitonin/calcitonin-related polypeptide, alpha                                                |
| <b>Calcb</b>         | 116903    | calcitonin-related polypeptide, beta                                                            |
| <b>Cald1</b>         | 109624    | caldesmon 1                                                                                     |
| <b>Camk1g</b>        | 215303    | calcium/calmodulin-dependent protein kinase I gamma                                             |
| <b>Cap1</b>          | 12331     | CAP, adenylate cyclase-associated protein 1 (yeast)                                             |
| <b>Car11</b>         | 12348     | carbonic anhydrase 11                                                                           |
| <b>Car14</b>         | 23831     | carbonic anhydrase 14                                                                           |
| <b>Car5a</b>         | 12352     | carbonic anhydrase 5a, mitochondrial                                                            |
| <b>Cartpt</b>        | 27220     | CART prepropeptide                                                                              |
| <b>Cbfa2t3</b>       | 12398     | core-binding factor, runt domain, alpha subunit 2, translocated to, 3 (human)                   |

|                |        |                                                               |
|----------------|--------|---------------------------------------------------------------|
| <b>Cbln1</b>   | 12404  | cerebellin 1 precursor protein                                |
| <b>Cbx8</b>    | 30951  | chromobox 8                                                   |
| <b>Ccdc113</b> | 244608 | coiled-coil domain containing 113                             |
| <b>Ccdc132</b> | 73288  | coiled-coil domain containing 132                             |
| <b>Ccdc174</b> | 232236 | coiled-coil domain containing 174                             |
| <b>Ccdc24</b>  | 381546 | coiled-coil domain containing 24                              |
| <b>Ccdc36</b>  | 434438 | coiled-coil domain containing 36                              |
| <b>Ccdc58</b>  | 381045 | coiled-coil domain containing 58                              |
| <b>Ccdc60</b>  | 269693 | coiled-coil domain containing 60                              |
| <b>Ccdc64</b>  | 75665  | coiled-coil domain containing 64                              |
| <b>Ccdc65</b>  | 105833 | coiled-coil domain containing 65                              |
| <b>Ccdc74a</b> | 72315  | coiled-coil domain containing 74A                             |
| <b>Ccdc85c</b> | 668158 | coiled-coil domain containing 85C                             |
| <b>Ccdc93</b>  | 70829  | coiled-coil domain containing 93                              |
| <b>Cnd3</b>    | 12445  | cyclin D3                                                     |
| <b>Cng2</b>    | 12452  | cyclin G2                                                     |
| <b>Cny11</b>   | 227210 | cyclin Y-like 1                                               |
| <b>Ccr10</b>   | 12777  | chemokine (C-C motif) receptor 10                             |
| <b>Ccr4</b>    | 12773  | chemokine (C-C motif) receptor 4                              |
| <b>Ccr12</b>   | 54199  | chemokine (C-C motif) receptor-like 2                         |
| <b>Cd16311</b> | 244233 | CD163 molecule-like 1                                         |
| <b>Cd164</b>   | 53599  | CD164 antigen                                                 |
| <b>Cdc34</b>   | 216150 | cell division cycle 34                                        |
| <b>Cdca3</b>   | 14793  | cell division cycle associated 3                              |
| <b>Cdca5</b>   | 67849  | cell division cycle associated 5                              |
| <b>Cdcp2</b>   | 242603 | CUB domain containing protein 2                               |
| <b>Cdh26</b>   | 381409 | cadherin-like 26                                              |
| <b>Cdh4</b>    | 12561  | cadherin 4                                                    |
| <b>Cdk8</b>    | 264064 | cyclin-dependent kinase 8                                     |
| <b>Cdk9</b>    | 107951 | cyclin-dependent kinase 9 (CDC2-related kinase)               |
| <b>Cdkn1b</b>  | 12576  | cyclin-dependent kinase inhibitor 1B                          |
| <b>Cdkn1c</b>  | 12577  | cyclin-dependent kinase inhibitor 1C (P57)                    |
| <b>Cdt1</b>    | 67177  | chromatin licensing and DNA replication factor 1              |
| <b>Cdv3</b>    | 321022 | carnitine deficiency-associated gene expressed in ventricle 3 |
| <b>Ccer2</b>   | 330409 | cat eye syndrome chromosome region, candidate 2               |
| <b>Cel</b>     | 12613  | carboxyl ester lipase                                         |
| <b>Celrr</b>   | 98452  | cerebellum expressed regulatory RNA                           |
| <b>Celrr</b>   | .      | .                                                             |
| <b>Cenpi</b>   | 102920 | centromere protein I                                          |
| <b>Cenpl</b>   | 70454  | centromere protein L                                          |
| <b>Cenpu</b>   | 71876  | centromere protein U                                          |
| <b>Cerk</b>    | 223753 | ceramide kinase                                               |
| <b>Ces2h</b>   | 436059 | carboxylesterase 2H                                           |

|                |        |                                                                        |
|----------------|--------|------------------------------------------------------------------------|
| <b>Ces3b</b>   | 13909  | carboxylesterase 3B                                                    |
| <b>Ces4a</b>   | 234677 | carboxylesterase 4A                                                    |
| <b>Chic2</b>   | 74277  | cysteine-rich hydrophobic domain 2                                     |
| <b>Chml</b>    | 12663  | choroideremia-like                                                     |
| <b>Chn1</b>    | 108699 | chimerin 1                                                             |
| <b>Chrne</b>   | 11448  | cholinergic receptor, nicotinic, epsilon polypeptide                   |
| <b>Chst1</b>   | 76969  | carbohydrate (keratan sulfate Gal-6) sulfotransferase 1                |
| <b>Chst15</b>  | 77590  | carbohydrate (N-acetylgalactosamine 4-sulfate 6-O) sulfotransferase 15 |
| <b>Chtop</b>   | 66511  | chromatin target of PRMT1                                              |
| <b>Cisd1</b>   | 52637  | CDGSH iron sulfur domain 1                                             |
| <b>Ckap2l</b>  | 70466  | cytoskeleton associated protein 2-like                                 |
| <b>Cldn11</b>  | 18417  | claudin 11                                                             |
| <b>Cldn13</b>  | 57255  | claudin 13                                                             |
| <b>Cldn14</b>  | 56173  | claudin 14                                                             |
| <b>Cldn15</b>  | 60363  | claudin 15                                                             |
| <b>Cldn2</b>   | 12738  | claudin 2                                                              |
| <b>Clec16a</b> | 74374  | C-type lectin domain family 16, member A                               |
| <b>Clec1b</b>  | 56760  | C-type lectin domain family 1, member b                                |
| <b>Clec4a1</b> | 269799 | C-type lectin domain family 4, member a1                               |
| <b>Clic4</b>   | 29876  | chloride intracellular channel 4 (mitochondrial)                       |
| <b>Clk2</b>    | 12748  | CDC-like kinase 2                                                      |
| <b>Clptm1</b>  | 56457  | cleft lip and palate associated transmembrane protein 1                |
| <b>Clstn3</b>  | 232370 | calsyntenin 3                                                          |
| <b>Cmas</b>    | 12764  | cytidine monophospho-N-acetylneuraminic acid synthetase                |
| <b>Cmtm7</b>   | 102545 | CKLF-like MARVEL transmembrane domain containing 7                     |
| <b>Cnksr2</b>  | 245684 | connector enhancer of kinase suppressor of Ras 2                       |
| <b>Cnn2</b>    | 12798  | calponin 2                                                             |
| <b>Cnn3</b>    | 71994  | calponin 3, acidic                                                     |
| <b>Cntd1</b>   | 68107  | cyclin N-terminal domain containing 1                                  |
| <b>Cog1</b>    | 16834  | component of oligomeric golgi complex 1                                |
| <b>Cog2</b>    | 76332  | component of oligomeric golgi complex 2                                |
| <b>Col6a3</b>  | 12835  | collagen, type VI, alpha 3                                             |
| <b>Cox4i1</b>  | 12857  | cytochrome c oxidase subunit IV isoform 1                              |
| <b>Cox6b1</b>  | 110323 | cytochrome c oxidase, subunit VIb polypeptide 1                        |
| <b>Cox7a2</b>  | 12866  | cytochrome c oxidase subunit VIIa 2                                    |
| <b>Cox7b</b>   | 66142  | cytochrome c oxidase subunit VIIb                                      |
| <b>Cpeb1</b>   | 12877  | cytoplasmic polyadenylation element binding protein 1                  |
| <b>Cpt1c</b>   | 78070  | carnitine palmitoyltransferase 1c                                      |
| <b>Crhr1</b>   | 12921  | corticotropin releasing hormone receptor 1                             |
| <b>Crip1</b>   | 12925  | cysteine-rich protein 1 (intestinal)                                   |
| <b>Csf3</b>    | 12985  | colony stimulating factor 3 (granulocyte)                              |
| <b>Csrnp3</b>  | 77771  | cysteine-serine-rich nuclear protein 3                                 |
| <b>Cstf1</b>   | 67337  | cleavage stimulation factor, 3' pre-RNA, subunit 1                     |

|                      |        |                                                                                     |
|----------------------|--------|-------------------------------------------------------------------------------------|
| <b>Ctbp2</b>         | 13017  | C-terminal binding protein 2                                                        |
| <b>Ctcflos</b>       | 74161  | CCCTC-binding factor (zinc finger protein)-like, opposite strand                    |
| <b>Ctcflos</b>       | .      | .                                                                                   |
| <b>Ctdsp2</b>        | 52468  | CTD (carboxy-terminal domain, RNA polymerase II, polypeptide A) small phosphatase 2 |
| <b>Cth</b>           | 107869 | cystathionase (cystathionine gamma-lyase)                                           |
| <b>Ctxn2</b>         | 381418 | cortexin 2                                                                          |
| <b>Cwc25</b>         | 67480  | CWC25 spliceosome-associated protein homolog ( <i>S. cerevisiae</i> )               |
| <b>Cwc27</b>         | 67285  | CWC27 spliceosome-associated protein homolog ( <i>S. cerevisiae</i> )               |
| <b>Cxcl10</b>        | 15945  | chemokine (C-X-C motif) ligand 10                                                   |
| <b>Cxcr3</b>         | 12766  | chemokine (C-X-C motif) receptor 3                                                  |
| <b>Cxxc4</b>         | 319478 | CXXC finger 4                                                                       |
| <b>Cyb561a3</b>      | 225912 | cytochrome b561 family, member A3                                                   |
| <b>Cyth1</b>         | 19157  | cytohesin 1                                                                         |
| <b>D130040H23Rik</b> | 211135 | RIKEN cDNA D130040H23 gene                                                          |
| <b>D3Bwg0562e</b>    | .      | .                                                                                   |
| <b>D430020J02Rik</b> | 319545 | RIKEN cDNA D430020J02 gene                                                          |
| <b>D430041D05Rik</b> | 241589 | RIKEN cDNA D430041D05 gene                                                          |
| <b>D630010B17Rik</b> | 328594 | RIKEN cDNA D630010B17 gene                                                          |
| <b>D6Ertd527e</b>    | 52372  | DNA segment, Chr 6, ERATO Doi 527, expressed                                        |
| <b>D7Ertd443e</b>    | 71007  | DNA segment, Chr 7, ERATO Doi 443, expressed                                        |
| <b>Daam2</b>         | 76441  | dishevelled associated activator of morphogenesis 2                                 |
| <b>Dars2</b>         | 226539 | aspartyl-tRNA synthetase 2 (mitochondrial)                                          |
| <b>Dbi</b>           | 13167  | diazepam binding inhibitor                                                          |
| <b>Dcaf13</b>        | 223499 | DDB1 and CUL4 associated factor 13                                                  |
| <b>Delre1c</b>       | 227525 | DNA cross-link repair 1C, PSO2 homolog ( <i>S. cerevisiae</i> )                     |
| <b>Dctn2</b>         | 69654  | dynactin 2                                                                          |
| <b>Ddb2</b>          | 107986 | damage specific DNA binding protein 2                                               |
| <b>Ddx10</b>         | 77591  | DEAD (Asp-Glu-Ala-Asp) box polypeptide 10                                           |
| <b>Ddx17</b>         | 67040  | DEAD (Asp-Glu-Ala-Asp) box polypeptide 17                                           |
| <b>Ddx39b</b>        | 53817  | DEAD (Asp-Glu-Ala-Asp) box polypeptide 39B                                          |
| <b>Ddx5</b>          | 13207  | DEAD (Asp-Glu-Ala-Asp) box polypeptide 5                                            |
| <b>Dennd1b</b>       | 329260 | DENN/MADD domain containing 1B                                                      |
| <b>Dgat2l6</b>       | 668257 | diacylglycerol O-acyltransferase 2-like 6                                           |
| <b>Dhx8</b>          | 217207 | DEAH (Asp-Glu-Ala-His) box polypeptide 8                                            |
| <b>Diap2</b>         | 54004  | diaphanous homolog 2 ( <i>Drosophila</i> )                                          |
| <b>Dido1</b>         | 23856  | death inducer-obliterator 1                                                         |
| <b>Disp2</b>         | 214240 | dispatched homolog 2 ( <i>Drosophila</i> )                                          |
| <b>Dlg1</b>          | 13383  | discs, large homolog 1 ( <i>Drosophila</i> )                                        |
| <b>Dmtn</b>          | 13829  | dematin actin binding protein                                                       |
| <b>Dnajc14</b>       | 74330  | DnaJ (Hsp40) homolog, subfamily C, member 14                                        |
| <b>Dnajc6</b>        | 72685  | DnaJ (Hsp40) homolog, subfamily C, member 6                                         |
| <b>Dnali1</b>        | 75563  | dynein, axonemal, light intermediate polypeptide 1                                  |

|                      |        |                                                                            |
|----------------------|--------|----------------------------------------------------------------------------|
| <b>Dner</b>          | 227325 | delta/notch-like EGF-related receptor                                      |
| <b>Dock9</b>         | 105445 | dedicator of cytokinesis 9                                                 |
| <b>Dpep3</b>         | 71854  | dipeptidase 3                                                              |
| <b>Dpf3</b>          | 70127  | D4, zinc and double PHD fingers, family 3                                  |
| <b>Dppa3</b>         | 73708  | developmental pluripotency-associated 3                                    |
| <b>Drg2</b>          | 13495  | developmentally regulated GTP binding protein 2                            |
| <b>Drp2</b>          | 13497  | dystrophin related protein 2                                               |
| <b>Dtwd2</b>         | 68857  | DTW domain containing 2                                                    |
| <b>Dtx1</b>          | 14357  | deltex 1 homolog (Drosophila)                                              |
| <b>Dusp15</b>        | 252864 | dual specificity phosphatase-like 15                                       |
| <b>Dyrk2</b>         | 69181  | dual-specificity tyrosine-(Y)-phosphorylation regulated kinase 2           |
| <b>Dyrk3</b>         | 226419 | dual-specificity tyrosine-(Y)-phosphorylation regulated kinase 3           |
| <b>E130006D01Rik</b> | 269683 | RIKEN cDNA E130006D01 gene                                                 |
| <b>E130006D01Rik</b> | .      | .                                                                          |
| <b>E130218I03Rik</b> | .      | .                                                                          |
| <b>E130218I03Rik</b> | 77490  | RIKEN cDNA E130218I03 gene                                                 |
| <b>E2f1</b>          | 13555  | E2F transcription factor 1                                                 |
| <b>E2f4</b>          | 104394 | E2F transcription factor 4                                                 |
| <b>E2f7</b>          | 52679  | E2F transcription factor 7                                                 |
| <b>Ebna1bp2</b>      | 69072  | EBNA1 binding protein 2                                                    |
| <b>Ech1</b>          | 51798  | enoyl coenzyme A hydratase 1, peroxisomal                                  |
| <b>Eci3</b>          | 69123  | enoyl-Coenzyme A delta isomerase 3                                         |
| <b>Eda2r</b>         | 245527 | ectodysplasin A2 receptor                                                  |
| <b>Edf1</b>          | 59022  | endothelial differentiation-related factor 1                               |
| <b>Efna1</b>         | 13636  | ephrin A1                                                                  |
| <b>Efna2</b>         | 13637  | ephrin A2                                                                  |
| <b>Egr4</b>          | 13656  | early growth response 4                                                    |
| <b>Eid3</b>          | 66341  | EP300 interacting inhibitor of differentiation 3                           |
| <b>Eif4b</b>         | 75705  | eukaryotic translation initiation factor 4B                                |
| <b>Eif4e3</b>        | 66892  | eukaryotic translation initiation factor 4E member 3                       |
| <b>Elavl2</b>        | 15569  | ELAV (embryonic lethal, abnormal vision, Drosophila)-like 2 (Hu antigen B) |
| <b>Elavl4</b>        | 15572  | ELAV (embryonic lethal, abnormal vision, Drosophila)-like 4 (Hu antigen D) |
| <b>Emb</b>           | 13723  | embigin                                                                    |
| <b>Eme1</b>          | 268465 | essential meiotic endonuclease 1 homolog 1 (S. pombe)                      |
| <b>Endou</b>         | 19011  | endonuclease, polyU-specific                                               |
| <b>Eno4</b>          | 226265 | enolase 4                                                                  |
| <b>Enpep</b>         | 13809  | glutamyl aminopeptidase                                                    |
| <b>Entpd6</b>        | 12497  | ectonucleoside triphosphate diphosphohydrolase 6                           |
| <b>Epb4.1</b>        | 269587 | erythrocyte protein band 4.1                                               |
| <b>Epc1</b>          | 13831  | enhancer of polycomb homolog 1 (Drosophila)                                |
| <b>Ephb1</b>         | 270190 | Eph receptor B1                                                            |
| <b>Ephb2</b>         | 13844  | Eph receptor B2                                                            |



|                 |        |                                                                                       |
|-----------------|--------|---------------------------------------------------------------------------------------|
| <b>Eppin</b>    | 75526  | epididymal peptidase inhibitor                                                        |
| <b>Ercc3</b>    | 13872  | excision repair cross-complementing rodent repair deficiency, complementation group 3 |
| <b>Erg</b>      | 13876  | avian erythroblastosis virus E-26 (v-ets) oncogene related                            |
| <b>Ergic2</b>   | 67456  | ERGIC and golgi 2                                                                     |
| <b>Erh</b>      | 13877  | enhancer of rudimentary homolog (Drosophila)                                          |
| <b>Esrp2</b>    | 77411  | epithelial splicing regulatory protein 2                                              |
| <b>Esrra</b>    | 26379  | estrogen related receptor, alpha                                                      |
| <b>Evalc</b>    | 70967  | eva-1 homolog C (C. elegans)                                                          |
| <b>Evi5l</b>    | 213027 | ecotropic viral integration site 5 like                                               |
| <b>Exoc3l</b>   | 277978 | exocyst complex component 3-like                                                      |
| <b>Ext1</b>     | 14042  | exostoses (multiple) 1                                                                |
| <b>Ezh1</b>     | 14055  | enhancer of zeste homolog 1 (Drosophila)                                              |
| <b>F3</b>       | 14066  | coagulation factor III                                                                |
| <b>F5</b>       | 14067  | coagulation factor V                                                                  |
| <b>Fabp3</b>    | 14077  | fatty acid binding protein 3, muscle and heart                                        |
| <b>Faim2</b>    | 72393  | Fas apoptotic inhibitory molecule 2                                                   |
| <b>Fam109a</b>  | 231717 | family with sequence similarity 109, member A                                         |
| <b>Fam162a</b>  | 70186  | family with sequence similarity 162, member A                                         |
| <b>Fam169a</b>  | 320557 | family with sequence similarity 169, member A                                         |
| <b>Fam171a1</b> | 269233 | family with sequence similarity 171, member A1                                        |
| <b>Fam19a5</b>  | 106014 | family with sequence similarity 19, member A5                                         |
| <b>Fam210a</b>  | 108654 | family with sequence similarity 210, member A                                         |
| <b>Fam222a</b>  | 433940 | family with sequence similarity 222, member A                                         |
| <b>Fam229a</b>  | 68233  | family with sequence similarity 229, member A                                         |
| <b>Fam78b</b>   | 226610 | family with sequence similarity 78, member B                                          |
| <b>Fam83d</b>   | 71878  | family with sequence similarity 83, member D                                          |
| <b>Fancl</b>    | 67030  | Fanconi anemia, complementation group L                                               |
| <b>Farp1</b>    | 223254 | FERM, RhoGEF (Arhgef) and pleckstrin domain protein 1 (chondrocyte-derived)           |
| <b>Fastkd5</b>  | 380601 | FAST kinase domains 5                                                                 |
| <b>Fbln5</b>    | 23876  | fibulin 5                                                                             |
| <b>Fbrsl1</b>   | 381668 | fibrosin-like 1                                                                       |
| <b>Fbx119</b>   | 233902 | F-box and leucine-rich repeat protein 19                                              |
| <b>Fbx15</b>    | 242960 | F-box and leucine-rich repeat protein 5                                               |
| <b>Fcgr4</b>    | 246256 | Fc receptor, IgG, low affinity IV                                                     |
| <b>Fchsd1</b>   | 319262 | FCH and double SH3 domains 1                                                          |
| <b>Fen1</b>     | 14156  | flap structure specific endonuclease 1                                                |
| <b>Fes</b>      | 14159  | feline sarcoma oncogene                                                               |
| <b>Fgf14</b>    | 14169  | fibroblast growth factor 14                                                           |
| <b>Fgf23</b>    | 64654  | fibroblast growth factor 23                                                           |
| <b>Fgf3</b>     | 14174  | fibroblast growth factor 3                                                            |
| <b>Fhod1</b>    | 234686 | formin homology 2 domain containing 1                                                 |
| <b>Figln2</b>   | 668225 | fidetin-like 2                                                                        |

|                |           |                                                                                          |
|----------------|-----------|------------------------------------------------------------------------------------------|
| <b>Fis1</b>    | 66437     | fission 1 (mitochondrial outer membrane) homolog (yeast)                                 |
| <b>Fjx1</b>    | 14221     | four jointed box 1 (Drosophila)                                                          |
| <b>Fmn1</b>    | 57778     | formin-like 1                                                                            |
| <b>Fndc5</b>   | 384061    | fibronectin type III domain containing 5                                                 |
| <b>Foxd2</b>   | 17301     | forkhead box D2                                                                          |
| <b>Foxg1</b>   | 15228     | forkhead box G1                                                                          |
| <b>Foxp1</b>   | 108655    | forkhead box P1                                                                          |
| <b>Foxs1</b>   | 14239     | forkhead box S1                                                                          |
| <b>Fpgt</b>    | 75540     | fucose-1-phosphate guanylyltransferase                                                   |
| <b>Frmd4b</b>  | 232288    | FERM domain containing 4B                                                                |
| <b>Frmd6</b>   | 319710    | FERM domain containing 6                                                                 |
| <b>Frmd8</b>   | 67457     | FERM domain containing 8                                                                 |
| <b>Frmpd3</b>  | 245643    | FERM and PDZ domain containing 3                                                         |
| <b>Fscn1</b>   | 14086     | fascin homolog 1, actin bundling protein (Strongylocentrotus purpuratus)                 |
| <b>Fzd7</b>    | 14369     | frizzled homolog 7 (Drosophila)                                                          |
| <b>Gabrd</b>   | 14403     | gamma-aminobutyric acid (GABA) A receptor, subunit delta                                 |
| <b>Gal3st3</b> | 545276    | galactose-3-O-sulfotransferase 3                                                         |
| <b>Ganc</b>    | 76051     | glucosidase, alpha; neutral C                                                            |
| <b>Gcnt4</b>   | 218476    | glucosaminyl (N-acetyl) transferase 4, core 2 (beta-1,6-N-acetylglucosaminyltransferase) |
| <b>Gdap111</b> | 228858    | ganglioside-induced differentiation-associated protein 1-like 1                          |
| <b>Gdf11</b>   | 14561     | growth differentiation factor 11                                                         |
| <b>Ghrh</b>    | 14601     | growth hormone releasing hormone                                                         |
| <b>Gid8</b>    | 76425     | GID complex subunit 8 homolog (S. cerevisiae)                                            |
| <b>Gin1</b>    | 252876    | gypsy retrotransposon integrase 1                                                        |
| <b>Gip</b>     | 14607     | gastric inhibitory polypeptide                                                           |
| <b>Gja8</b>    | 14616     | gap junction protein, alpha 8                                                            |
| <b>Gjb5</b>    | 14622     | gap junction protein, beta 5                                                             |
| <b>Glr4</b>    | 14657     | glycine receptor, alpha 4 subunit                                                        |
| <b>Gltp</b>    | 56356     | glycolipid transfer protein                                                              |
| <b>Gm10584</b> | 100043682 | predicted gene 10584                                                                     |
| <b>Gm11562</b> | 100502803 | predicted gene 11562                                                                     |
| <b>Gm11595</b> | 100040276 | predicted gene 11595                                                                     |
| <b>Gm12695</b> | 620779    | predicted gene 12695                                                                     |
| <b>Gm12718</b> | 622167    | predicted gene 12718                                                                     |
| <b>Gm12718</b> | .         | .                                                                                        |
| <b>Gm13238</b> | .         | .                                                                                        |
| <b>Gm13238</b> | 236069    | carnitine deficiency-associated gene expressed in ventricle 3 pseudogene                 |
| <b>Gm13826</b> | .         | .                                                                                        |
| <b>Gm13889</b> | 620695    | predicted gene 13889                                                                     |
| <b>Gm14023</b> | .         | .                                                                                        |
| <b>Gm14023</b> | 100503468 | predicted gene 14023                                                                     |
| <b>Gm14164</b> | .         | .                                                                                        |

|                |           |                                                                            |
|----------------|-----------|----------------------------------------------------------------------------|
| <b>Gm14164</b> | 791417    | predicted gene 14164                                                       |
| <b>Gm15412</b> | .         | .                                                                          |
| <b>Gm15412</b> | 670727    | predicted gene 15412                                                       |
| <b>Gm1564</b>  | 268491    | predicted gene 1564                                                        |
| <b>Gm15663</b> | .         | .                                                                          |
| <b>Gm15663</b> | 327812    | predicted gene 15663                                                       |
| <b>Gm15760</b> | .         | .                                                                          |
| <b>Gm15760</b> | 100042948 | mitochondrial ribosomal protein S18B pseudogene                            |
| <b>Gm16063</b> | 330183    | predicted gene 16063                                                       |
| <b>Gm16063</b> | .         | .                                                                          |
| <b>Gm166</b>   | 233899    | predicted gene 166                                                         |
| <b>Gm16701</b> | .         | .                                                                          |
| <b>Gm16701</b> | .         | .                                                                          |
| <b>Gm16701</b> | 100503962 | predicted gene, 16701                                                      |
| <b>Gm17296</b> | 212728    | predicted gene, 17296                                                      |
| <b>Gm2061</b>  | 100039138 | predicted gene 2061                                                        |
| <b>Gm2061</b>  | .         | .                                                                          |
| <b>Gm2109</b>  | .         | .                                                                          |
| <b>Gm2109</b>  | 100039222 | predicted gene 2109                                                        |
| <b>Gm2694</b>  | .         | .                                                                          |
| <b>Gm2694</b>  | 100040294 | predicted gene 2694                                                        |
| <b>Gm4013</b>  | 100042757 | predicted gene 4013                                                        |
| <b>Gm4262</b>  | .         | .                                                                          |
| <b>Gm4262</b>  | 100043147 | predicted gene 4262                                                        |
| <b>Gm4980</b>  | 100503386 | predicted gene 4980                                                        |
| <b>Gm5166</b>  | .         | .                                                                          |
| <b>Gm5166</b>  | 382233    | DMRT-like family pseudogene                                                |
| <b>Gm53</b>    | 193022    | predicted gene 53                                                          |
| <b>Gm53</b>    | .         | .                                                                          |
| <b>Gm5475</b>  | .         | .                                                                          |
| <b>Gm5475</b>  | 432982    | predicted gene 5475                                                        |
| <b>Gm5477</b>  | 432986    | type II keratin Kb16P                                                      |
| <b>Gm6042</b>  | 574415    | type II keratin Kb32P                                                      |
| <b>Gm614</b>   | 245536    | predicted gene 614                                                         |
| <b>Gm7157</b>  | .         | .                                                                          |
| <b>Gm7538</b>  | 665194    | predicted gene 7538                                                        |
| <b>Gm826</b>   | 329554    | predicted gene 826                                                         |
| <b>Gmfg</b>    | 63986     | glia maturation factor, gamma                                              |
| <b>Gnai3</b>   | 14679     | guanine nucleotide binding protein (G protein), alpha inhibiting 3         |
| <b>Gnas</b>    | 14683     | GNAS (guanine nucleotide binding protein, alpha stimulating) complex locus |
| <b>Gnb3</b>    | 14695     | guanine nucleotide binding protein (G protein), beta 3                     |
| <b>Gopc</b>    | 94221     | golgi associated PDZ and coiled-coil motif containing                      |

|                   |        |                                                                  |
|-------------------|--------|------------------------------------------------------------------|
| <b>Gpc1</b>       | 14733  | glypican 1                                                       |
| <b>Gpc6</b>       | 23888  | glypican 6                                                       |
| <b>Gpr133</b>     | .      | .                                                                |
| <b>Gpr143</b>     | 18241  | G protein-coupled receptor 143                                   |
| <b>Gpr182</b>     | 11536  | G protein-coupled receptor 182                                   |
| <b>Gpr27</b>      | 14761  | G protein-coupled receptor 27                                    |
| <b>Gpr3</b>       | 14748  | G-protein coupled receptor 3                                     |
| <b>Gpr84</b>      | 80910  | G protein-coupled receptor 84                                    |
| <b>Gprc5b</b>     | 64297  | G protein-coupled receptor, family C, group 5, member B          |
| <b>Gpsm1</b>      | 67839  | G-protein signalling modulator 1 (AGS3-like, <i>C. elegans</i> ) |
| <b>Gpx7</b>       | 67305  | glutathione peroxidase 7                                         |
| <b>Grik3</b>      | 14807  | glutamate receptor, ionotropic, kainate 3                        |
| <b>Grip1</b>      | 74053  | glutamate receptor interacting protein 1                         |
| <b>Grpr</b>       | 14829  | gastrin releasing peptide receptor                               |
| <b>Gsdma</b>      | 57911  | gasdermin A                                                      |
| <b>Gsg1l</b>      | 269994 | GSG1-like                                                        |
| <b>Gsr</b>        | 14782  | glutathione reductase                                            |
| <b>Gtf2a2</b>     | 235459 | general transcription factor II A, 2                             |
| <b>Gtf3c6</b>     | 67371  | general transcription factor IIIC, polypeptide 6, alpha          |
| <b>Gtsf1</b>      | 74174  | gametocyte specific factor 1                                     |
| <b>Hamp2</b>      | 66438  | hepcidin antimicrobial peptide 2                                 |
| <b>Haus5</b>      | 71909  | HAUS augmin-like complex, subunit 5                              |
| <b>Hcn3</b>       | 15168  | hyperpolarization-activated, cyclic nucleotide-gated K+ 3        |
| <b>Hdac8</b>      | 70315  | histone deacetylase 8                                            |
| <b>Helz</b>       | 78455  | helicase with zinc finger domain                                 |
| <b>Hepacam2</b>   | 101202 | HEPACAM family member 2                                          |
| <b>Hexim1</b>     | 192231 | hexamethylene bis-acetamide inducible 1                          |
| <b>Higd1c</b>     | 380975 | HIG1 domain family, member 1C                                    |
| <b>Higd2a</b>     | 67044  | HIG1 domain family, member 2A                                    |
| <b>Hist2h2aa1</b> | 15267  | histone cluster 2, H2aa1                                         |
| <b>Hist2h2aa2</b> | 319192 | histone cluster 2, H2aa2                                         |
| <b>Hist2h3c1</b>  | 15077  | histone cluster 2, H3c1                                          |
| <b>Hist2h3c2</b>  | 97114  | histone cluster 2, H3c2                                          |
| <b>Hlf</b>        | 217082 | hepatic leukemia factor                                          |
| <b>Hmx2</b>       | 15372  | H6 homeobox 2                                                    |
| <b>Hnrnp1</b>     | 15388  | heterogeneous nuclear ribonucleoprotein L                        |
| <b>Hook1</b>      | 77963  | hook homolog 1 ( <i>Drosophila</i> )                             |
| <b>Hook2</b>      | 170833 | hook homolog 2 ( <i>Drosophila</i> )                             |
| <b>Hoxa5</b>      | 15402  | homeobox A5                                                      |
| <b>Hoxa6</b>      | 15403  | homeobox A6                                                      |
| <b>Hoxb2</b>      | 103889 | homeobox B2                                                      |
| <b>Hoxc8</b>      | 15426  | homeobox C8                                                      |
| <b>Hp</b>         | 15439  | haptoglobin                                                      |

|                 |        |                                                                                 |
|-----------------|--------|---------------------------------------------------------------------------------|
| <b>Hpd1</b>     | 242642 | 4-hydroxyphenylpyruvate dioxygenase-like                                        |
| <b>Hrh3</b>     | 99296  | histamine receptor H3                                                           |
| <b>Hs6st3</b>   | 50787  | heparan sulfate 6-O-sulfotransferase 3                                          |
| <b>Hsd17b14</b> | 66065  | hydroxysteroid (17-beta) dehydrogenase 14                                       |
| <b>Hsd17b2</b>  | 15486  | hydroxysteroid (17-beta) dehydrogenase 2                                        |
| <b>Hunk</b>     | 26559  | hormonally upregulated Neu-associated kinase                                    |
| <b>Ier2</b>     | 15936  | immediate early response 2                                                      |
| <b>Iffo2</b>    | 212632 | intermediate filament family orphan 2                                           |
| <b>Ifitm10</b>  | 320802 | interferon induced transmembrane protein 10                                     |
| <b>Ift122</b>   | 81896  | intraflagellar transport 122                                                    |
| <b>Ift46</b>    | 76568  | intraflagellar transport 46                                                     |
| <b>Igbp1</b>    | 18518  | immunoglobulin (CD79A) binding protein 1                                        |
| <b>Igbp1b</b>   | 50540  | immunoglobulin (CD79A) binding protein 1b                                       |
| <b>Igf2bp1</b>  | 140486 | insulin-like growth factor 2 mRNA binding protein 1                             |
| <b>Igfals</b>   | 16005  | insulin-like growth factor binding protein, acid labile subunit                 |
| <b>Igsf9</b>    | 93842  | immunoglobulin superfamily, member 9                                            |
| <b>Il12b</b>    | 16160  | interleukin 12b                                                                 |
| <b>Il4ra</b>    | 16190  | interleukin 4 receptor, alpha                                                   |
| <b>Ints5</b>    | 109077 | integrator complex subunit 5                                                    |
| <b>Ipmk</b>     | 69718  | inositol polyphosphate multikinase                                              |
| <b>Iqsec1</b>   | 232227 | IQ motif and Sec7 domain 1                                                      |
| <b>Iqsec2</b>   | 245666 | IQ motif and Sec7 domain 2                                                      |
| <b>Irf9</b>     | 16391  | interferon regulatory factor 9                                                  |
| <b>Irgm1</b>    | 15944  | immunity-related GTPase family M member 1                                       |
| <b>Irs4</b>     | 16370  | insulin receptor substrate 4                                                    |
| <b>Isyna1</b>   | 71780  | myo-inositol 1-phosphate synthase A1                                            |
| <b>Itga3</b>    | 16400  | integrin alpha 3                                                                |
| <b>Itgb7</b>    | 16421  | integrin beta 7                                                                 |
| <b>Itpril2</b>  | 319622 | inositol 1,4,5-triphosphate receptor interacting protein-like 2                 |
| <b>Junb</b>     | 16477  | jun B proto-oncogene                                                            |
| <b>Kcnab2</b>   | 16498  | potassium voltage-gated channel, shaker-related subfamily, beta member 2        |
| <b>Kcnc4</b>    | 99738  | potassium voltage gated channel, Shaw-related subfamily, member 4               |
| <b>Kcnd3</b>    | 56543  | potassium voltage-gated channel, Shal-related family, member 3                  |
| <b>Kcnd3os</b>  | .      | .                                                                               |
| <b>Kcnd3os</b>  | 78635  | potassium voltage-gated channel, Shal-related family, member 3, opposite strand |
| <b>Kcne2</b>    | 246133 | potassium voltage-gated channel, Isk-related subfamily, gene 2                  |
| <b>Kcnj10</b>   | 16513  | potassium inwardly-rectifying channel, subfamily J, member 10                   |
| <b>Kcnj12</b>   | 16515  | potassium inwardly-rectifying channel, subfamily J, member 12                   |
| <b>Kcnk15</b>   | 241769 | potassium channel, subfamily K, member 15                                       |
| <b>Kctd12</b>   | 239217 | potassium channel tetramerisation domain containing 12                          |
| <b>Kctd13</b>   | 233877 | potassium channel tetramerisation domain containing 13                          |
| <b>Kctd3</b>    | 226823 | potassium channel tetramerisation domain containing 3                           |

|                     |        |                                                                         |
|---------------------|--------|-------------------------------------------------------------------------|
| <b>Khsrp</b>        | 16549  | KH-type splicing regulatory protein                                     |
| <b>Kif20a</b>       | 19348  | kinesin family member 20A                                               |
| <b>Kif22</b>        | 110033 | kinesin family member 22                                                |
| <b>Kif5a</b>        | 16572  | kinesin family member 5A                                                |
| <b>Kifc3</b>        | 16582  | kinesin family member C3                                                |
| <b>Kiss1</b>        | 280287 | KiSS-1 metastasis-suppressor                                            |
| <b>Klf15</b>        | 66277  | Kruppel-like factor 15                                                  |
| <b>Klhdc8a</b>      | 213417 | kelch domain containing 8A                                              |
| <b>Klh136</b>       | 234796 | kelch-like 36                                                           |
| <b>Klh142</b>       | 232539 | kelch-like 42                                                           |
| <b>Klk1b4</b>       | 18048  | kallikrein 1-related peptidase b4                                       |
| <b>Klk1b5</b>       | 16622  | kallikrein 1-related peptidase b5                                       |
| <b>Klk8</b>         | 259277 | kallikrein related-peptidase 8                                          |
| <b>Klr1c</b>        | 17059  | killer cell lectin-like receptor subfamily B member 1C                  |
| <b>Kpna7</b>        | 381686 | karyopherin alpha 7 (importin alpha 8)                                  |
| <b>Krt10</b>        | 16661  | keratin 10                                                              |
| <b>Krt13</b>        | 16663  | keratin 13                                                              |
| <b>Krt2</b>         | 16681  | keratin 2                                                               |
| <b>Krt5</b>         | 110308 | keratin 5                                                               |
| <b>Krt6a</b>        | 16687  | keratin 6A                                                              |
| <b>Krt77</b>        | 406220 | keratin 77                                                              |
| <b>Krtap17-1</b>    | 77914  | keratin associated protein 17-1                                         |
| <b>Krtap2-4</b>     | 71453  | keratin associated protein 2-4                                          |
| <b>Krtap4-6</b>     | 68768  | keratin associated protein 4-6                                          |
| <b>Krtap4-8</b>     | 665992 | keratin associated protein 4-8                                          |
| <b>Krtap4-9</b>     | 665998 | keratin associated protein 4-9                                          |
| <b>Krtap9-3</b>     | 75586  | keratin associated protein 9-3                                          |
| <b>Krtcap2</b>      | 66059  | keratinocyte associated protein 2                                       |
| <b>LOC100503676</b> | .      | .                                                                       |
| <b>LOC100504703</b> | .      | .                                                                       |
| <b>LOC381967</b>    | .      | .                                                                       |
| <b>Lama5</b>        | 16776  | laminin, alpha 5                                                        |
| <b>Lce1b</b>        | 68720  | late cornified envelope 1B                                              |
| <b>Lck</b>          | 16818  | lymphocyte protein tyrosine kinase                                      |
| <b>Ldhd</b>         | 16832  | lactate dehydrogenase B                                                 |
| <b>Ldlrap1</b>      | 100017 | low density lipoprotein receptor adaptor protein 1                      |
| <b>Ldoc1l</b>       | 223732 | leucine zipper, down-regulated in cancer 1-like                         |
| <b>Lef1</b>         | 16842  | lymphoid enhancer binding factor 1                                      |
| <b>Leo1</b>         | 235497 | Leo1, Paf1/RNA polymerase II complex component, homolog (S. cerevisiae) |
| <b>Lepr</b>         | 16847  | leptin receptor                                                         |
| <b>Lin28a</b>       | 83557  | lin-28 homolog A (C. elegans)                                           |
| <b>Lingo4</b>       | 320747 | leucine rich repeat and Ig domain containing 4                          |

|                  |           |                                                                               |
|------------------|-----------|-------------------------------------------------------------------------------|
| <b>Liph</b>      | 239759    | lipase, member H                                                              |
| <b>Litaf</b>     | 56722     | LPS-induced TN factor                                                         |
| <b>Lix1l</b>     | 280411    | Lix1-like                                                                     |
| <b>Lkaaeear1</b> | 277496    | LKAAEAR motif containing 1 (IKAAEAR murine motif)                             |
| <b>Lgl1</b>      | 16897     | lethal giant larvae homolog 1 (Drosophila)                                    |
| <b>Lmo4</b>      | 16911     | LIM domain only 4                                                             |
| <b>Lmod1</b>     | 93689     | leiomodulin 1 (smooth muscle)                                                 |
| <b>Lmtk2</b>     | 231876    | lemur tyrosine kinase 2                                                       |
| <b>Lpar5</b>     | 381810    | lysophosphatidic acid receptor 5                                              |
| <b>Lpin2</b>     | 64898     | lipin 2                                                                       |
| <b>Lpin3</b>     | 64899     | lipin 3                                                                       |
| <b>Lrig2</b>     | 269473    | leucine-rich repeats and immunoglobulin-like domains 2                        |
| <b>Lrp1</b>      | 16971     | low density lipoprotein receptor-related protein 1                            |
| <b>Lrp8</b>      | 16975     | low density lipoprotein receptor-related protein 8, apolipoprotein e receptor |
| <b>Lrrc38</b>    | 242735    | leucine rich repeat containing 38                                             |
| <b>Lrrc4c</b>    | 241568    | leucine rich repeat containing 4C                                             |
| <b>Lrriq3</b>    | 74435     | leucine-rich repeats and IQ motif containing 3                                |
| <b>Lrrn1</b>     | 16979     | leucine rich repeat protein 1, neuronal                                       |
| <b>Lrwd1</b>     | 71735     | leucine-rich repeats and WD repeat domain containing 1                        |
| <b>Luzp4</b>     | 105246601 | leucine zipper protein 4                                                      |
| <b>Luzp4</b>     | 434865    | leucine zipper protein 4                                                      |
| <b>Ly6g5c</b>    | 114652    | lymphocyte antigen 6 complex, locus G5C                                       |
| <b>Lyzl6</b>     | 69444     | lysozyme-like 6                                                               |
| <b>Macf1</b>     | 11426     | microtubule-actin crosslinking factor 1                                       |
| <b>Maf</b>       | 17132     | avian musculoaponeurotic fibrosarcoma (v-maf) AS42 oncogene homolog           |
| <b>Maged1</b>    | 94275     | melanoma antigen, family D, 1                                                 |
| <b>Magi3</b>     | 99470     | membrane associated guanylate kinase, WW and PDZ domain containing 3          |
| <b>Magt1</b>     | 67075     | magnesium transporter 1                                                       |
| <b>Malat1</b>    | .         | .                                                                             |
| <b>Malat1</b>    | 72289     | metastasis associated lung adenocarcinoma transcript 1 (non-coding RNA)       |
| <b>Maneal</b>    | 215090    | mannosidase, endo-alpha-like                                                  |
| <b>Mansc4</b>    | 545893    | MANSC domain containing 4                                                     |
| <b>Map2k6</b>    | 26399     | mitogen-activated protein kinase kinase 6                                     |
| <b>Map3k1</b>    | 26401     | mitogen-activated protein kinase kinase kinase 1                              |
| <b>Map6</b>      | 17760     | microtubule-associated protein 6                                              |
| <b>Mapkapk3</b>  | 102626    | mitogen-activated protein kinase-activated protein kinase 3                   |
| <b>Marcks</b>    | 17118     | myristoylated alanine rich protein kinase C substrate                         |
| <b>Marveld3</b>  | 73608     | MARVEL (membrane-associating) domain containing 3                             |
| <b>Mbd4</b>      | 17193     | methyl-CpG binding domain protein 4                                           |
| <b>Mc3r</b>      | 17201     | melanocortin 3 receptor                                                       |
| <b>Mcm2</b>      | 17216     | minichromosome maintenance deficient 2 mitotin (S. cerevisiae)                |
| <b>Mdk</b>       | 17242     | midkine                                                                       |
| <b>Mdm1</b>      | 17245     | transformed mouse 3T3 cell double minute 1                                    |

|                 |           |                                                   |
|-----------------|-----------|---------------------------------------------------|
| <b>Me1</b>      | 17436     | malic enzyme 1, NADP(+)-dependent, cytosolic      |
| <b>Med18</b>    | 67219     | mediator complex subunit 18                       |
| <b>Med19</b>    | 381379    | mediator complex subunit 19                       |
| <b>Med20</b>    | 56771     | mediator complex subunit 20                       |
| <b>Meig1</b>    | 104362    | meiosis expressed gene 1                          |
| <b>Mettl11b</b> | 240879    | methyltransferase like 11B                        |
| <b>Mfsd5</b>    | 106073    | major facilitator superfamily domain containing 5 |
| <b>Mgat3</b>    | 17309     | mannoside acetylglucosaminyltransferase 3         |
| <b>Mid1</b>     | 17318     | midline 1                                         |
| <b>Mid2</b>     | 23947     | midline 2                                         |
| <b>Mif4gd</b>   | 69674     | MIF4G domain containing                           |
| <b>Mir130a</b>  | .         | .                                                 |
| <b>Mir130a</b>  | 387149    | microRNA 130a                                     |
| <b>Mir138-1</b> | 387156    | microRNA 138-1                                    |
| <b>Mir138-1</b> | .         | .                                                 |
| <b>Mir141</b>   | .         | .                                                 |
| <b>Mir141</b>   | 387159    | microRNA 141                                      |
| <b>Mir17</b>    | 723905    | microRNA 17                                       |
| <b>Mir17</b>    | .         | .                                                 |
| <b>Mir17hg</b>  | .         | .                                                 |
| <b>Mir17hg</b>  | 75957     | Mir17 host gene (non-protein coding)              |
| <b>Mir18</b>    | .         | .                                                 |
| <b>Mir18</b>    | 387135    | microRNA 18                                       |
| <b>Mir181c</b>  | .         | .                                                 |
| <b>Mir181c</b>  | 723819    | microRNA 181c                                     |
| <b>Mir181d</b>  | 100049549 | microRNA 181d                                     |
| <b>Mir181d</b>  | .         | .                                                 |
| <b>Mir184</b>   | .         | .                                                 |
| <b>Mir184</b>   | 387179    | microRNA 184                                      |
| <b>Mir1893</b>  | 100316773 | microRNA 1893                                     |
| <b>Mir1893</b>  | .         | .                                                 |
| <b>Mir1895</b>  | 100316832 | microRNA 1895                                     |
| <b>Mir1895</b>  | .         | .                                                 |
| <b>Mir1905</b>  | 100316808 | microRNA 1905                                     |
| <b>Mir1905</b>  | .         | .                                                 |
| <b>Mir1934</b>  | .         | .                                                 |
| <b>Mir1934</b>  | 100316840 | microRNA 1934                                     |
| <b>Mir1940</b>  | .         | .                                                 |
| <b>Mir195a</b>  | .         | .                                                 |
| <b>Mir195a</b>  | 387190    | microRNA 195a                                     |
| <b>Mir1966</b>  | 100316712 | microRNA 1966                                     |
| <b>Mir1966</b>  | .         | .                                                 |
| <b>Mir1981</b>  | .         | .                                                 |



|                 |           |                                      |
|-----------------|-----------|--------------------------------------|
| <b>Mir1981</b>  | 100316821 | microRNA 1981                        |
| <b>Mir19a</b>   | .         | .                                    |
| <b>Mir19a</b>   | 723891    | microRNA 19a                         |
| <b>Mir19b-1</b> | .         | .                                    |
| <b>Mir19b-1</b> | 751527    | microRNA 19b-1                       |
| <b>Mir200c</b>  | .         | .                                    |
| <b>Mir200c</b>  | 723944    | microRNA 200c                        |
| <b>Mir20a</b>   | .         | .                                    |
| <b>Mir20a</b>   | 387139    | microRNA 20a                         |
| <b>Mir22</b>    | .         | .                                    |
| <b>Mir22</b>    | 387141    | microRNA 22                          |
| <b>Mir22hg</b>  | .         | .                                    |
| <b>Mir22hg</b>  | 100042498 | Mir22 host gene (non-protein coding) |
| <b>Mir26a-2</b> | 723962    | microRNA 26a-2                       |
| <b>Mir26a-2</b> | .         | .                                    |
| <b>Mir2861</b>  | .         | .                                    |
| <b>Mir2861</b>  | 100499514 | microRNA 2861                        |
| <b>Mir3065</b>  | 100526518 | microRNA 3065                        |
| <b>Mir3076</b>  | .         | .                                    |
| <b>Mir3076</b>  | 100526475 | microRNA 3076                        |
| <b>Mir3088</b>  | .         | .                                    |
| <b>Mir3088</b>  | 100526498 | microRNA 3088                        |
| <b>Mir3093</b>  | .         | .                                    |
| <b>Mir3093</b>  | 100526540 | microRNA 3093                        |
| <b>Mir30c-1</b> | .         | .                                    |
| <b>Mir30c-1</b> | 387227    | microRNA 30c-1                       |
| <b>Mir30f</b>   | 102466650 | microRNA 30f                         |
| <b>Mir3102</b>  | .         | .                                    |
| <b>Mir3102</b>  | 100526508 | microRNA 3102                        |
| <b>Mir3108</b>  | .         | .                                    |
| <b>Mir3108</b>  | 100526511 | microRNA 3108                        |
| <b>Mir326</b>   | 723840    | microRNA 326                         |
| <b>Mir326</b>   | .         | .                                    |
| <b>Mir3475</b>  | .         | .                                    |
| <b>Mir3475</b>  | 100499512 | microRNA 3475                        |
| <b>Mir3960</b>  | 100628606 | microRNA 3960                        |
| <b>Mir449a</b>  | .         | .                                    |
| <b>Mir449a</b>  | 723868    | microRNA 449a                        |
| <b>Mir449b</b>  | .         | .                                    |
| <b>Mir449b</b>  | 100190765 | microRNA 449b                        |
| <b>Mir497</b>   | 751537    | microRNA 497                         |
| <b>Mir497b</b>  | 102465891 | microRNA 497b                        |
| <b>Mir497b</b>  | .         | .                                    |

|                |           |               |
|----------------|-----------|---------------|
| <b>Mir499</b>  | 735275    | microRNA 499  |
| <b>Mir499</b>  | .         | .             |
| <b>Mir5114</b> | 100628619 | microRNA 5114 |
| <b>Mir5114</b> | .         | .             |
| <b>Mir5126</b> | .         | .             |
| <b>Mir5126</b> | 100628595 | microRNA 5126 |
| <b>Mir5130</b> | .         | .             |
| <b>Mir5130</b> | 100628599 | microRNA 5130 |
| <b>Mir5136</b> | 100628605 | microRNA 5136 |
| <b>Mir5136</b> | .         | .             |
| <b>Mir6391</b> | .         | .             |
| <b>Mir6391</b> | 102465208 | microRNA 6391 |
| <b>Mir672</b>  | .         | .             |
| <b>Mir672</b>  | 751535    | microRNA 672  |
| <b>Mir676</b>  | .         | .             |
| <b>Mir676</b>  | 751534    | microRNA 676  |
| <b>Mir6916</b> | .         | .             |
| <b>Mir6916</b> | 102465552 | microRNA 6916 |
| <b>Mir6931</b> | 102466988 | microRNA 6931 |
| <b>Mir6931</b> | .         | .             |
| <b>Mir6934</b> | .         | .             |
| <b>Mir6934</b> | 102465563 | microRNA 6934 |
| <b>Mir6959</b> | .         | .             |
| <b>Mir6959</b> | 102465981 | microRNA 6959 |
| <b>Mir6975</b> | .         | .             |
| <b>Mir6975</b> | 102465589 | microRNA 6975 |
| <b>Mir6977</b> | 102465590 | microRNA 6977 |
| <b>Mir6977</b> | .         | .             |
| <b>Mir7003</b> | .         | .             |
| <b>Mir7003</b> | 102465607 | microRNA 7003 |
| <b>Mir7004</b> | 102466784 | microRNA 7004 |
| <b>Mir702</b>  | 735283    | microRNA 702  |
| <b>Mir702</b>  | .         | .             |
| <b>Mir7022</b> | .         | .             |
| <b>Mir7022</b> | 102465619 | microRNA 7022 |
| <b>Mir7054</b> | .         | .             |
| <b>Mir7054</b> | 102466218 | microRNA 7054 |
| <b>Mir7072</b> | 102466800 | microRNA 7072 |
| <b>Mir7072</b> | .         | .             |
| <b>Mir7088</b> | 102466914 | microRNA 7088 |
| <b>Mir7088</b> | .         | .             |
| <b>Mir7222</b> | .         | .             |
| <b>Mir7222</b> | 102465704 | microRNA 7222 |

|                 |           |                                                   |
|-----------------|-----------|---------------------------------------------------|
| <b>Mir7233</b>  | 102466996 | microRNA 7233                                     |
| <b>Mir7235</b>  | 102466822 | microRNA 7235                                     |
| <b>Mir7235</b>  | .         | .                                                 |
| <b>Mir763</b>   | 791076    | microRNA 763                                      |
| <b>Mir763</b>   | .         | .                                                 |
| <b>Mir7678</b>  | .         | .                                                 |
| <b>Mir7678</b>  | 102465780 | microRNA 7678                                     |
| <b>Mir7686</b>  | 102465788 | microRNA mir-7686                                 |
| <b>Mir7687</b>  | .         | .                                                 |
| <b>Mir7687</b>  | 102466849 | microRNA 7687                                     |
| <b>Mir802</b>   | .         | .                                                 |
| <b>Mir802</b>   | 791074    | microRNA 802                                      |
| <b>Mir8103</b>  | 102465893 | microRNA 8103                                     |
| <b>Mir8103</b>  | .         | .                                                 |
| <b>Mir8107</b>  | .         | .                                                 |
| <b>Mir8107</b>  | 102466885 | microRNA 8107                                     |
| <b>Mir9-1</b>   | 387133    | microRNA 9-1                                      |
| <b>Mir92-1</b>  | .         | .                                                 |
| <b>Mir92-1</b>  | 751549    | microRNA 92-1                                     |
| <b>Mirlet7k</b> | .         | .                                                 |
| <b>Mixl1</b>    | 27217     | Mix1 homeobox-like 1 ( <i>Xenopus laevis</i> )    |
| <b>Mlxipl</b>   | 58805     | MLX interacting protein-like                      |
| <b>Mmd</b>      | 67468     | monocyte to macrophage differentiation-associated |
| <b>Mmp23</b>    | 26561     | matrix metalloproteinase 23                       |
| <b>Mmp24</b>    | 17391     | matrix metalloproteinase 24                       |
| <b>Mn1</b>      | 433938    | meningioma 1                                      |
| <b>Mnat1</b>    | 17420     | menage a trois 1                                  |
| <b>Mon1b</b>    | 270096    | MON1 homolog b (yeast)                            |
| <b>Mon2</b>     | 67074     | MON2 homolog (yeast)                              |
| <b>Mospd3</b>   | 68929     | motile sperm domain containing 3                  |
| <b>Mpdu1</b>    | 24070     | mannose-P-dolichol utilization defect 1           |
| <b>Mpped2</b>   | 77015     | metallophosphoesterase domain containing 2        |
| <b>Mpv17</b>    | 17527     | MpV17 mitochondrial inner membrane protein        |
| <b>Mrc2</b>     | 17534     | mannose receptor, C type 2                        |
| <b>Mrgpre</b>   | 244238    | MAS-related GPR, member E                         |
| <b>Mroh1</b>    | 223658    | maestro heat-like repeat family member 1          |
| <b>Mrpl18</b>   | 67681     | mitochondrial ribosomal protein L18               |
| <b>Mrpl27</b>   | 94064     | mitochondrial ribosomal protein L27               |
| <b>Mrpl32</b>   | 75398     | mitochondrial ribosomal protein L32               |
| <b>Mrps17</b>   | 66258     | mitochondrial ribosomal protein S17               |
| <b>Mrps6</b>    | 121022    | mitochondrial ribosomal protein S6                |
| <b>Mrvil</b>    | 17540     | MRV integration site 1                            |
| <b>Msi1</b>     | 17690     | musashi RNA-binding protein 1                     |

|                |           |                                                          |
|----------------|-----------|----------------------------------------------------------|
| <b>Msmg</b>    | 100039672 | microseminoprotein, prostate associated                  |
| <b>Msrbl</b>   | 27361     | methionine sulfoxide reductase B1                        |
| <b>Msrbl3</b>  | 320183    | methionine sulfoxide reductase B3                        |
| <b>Mst1</b>    | 15235     | macrophage stimulating 1 (hepatocyte growth factor-like) |
| <b>Mt4</b>     | 17752     | metallothionein 4                                        |
| <b>Mterfd3</b> | .         | .                                                        |
| <b>Mtmr4</b>   | 170749    | myotubularin related protein 4                           |
| <b>Muc6</b>    | 353328    | mucin 6, gastric                                         |
| <b>Muc6</b>    | .         | .                                                        |
| <b>Mvd</b>     | 192156    | mevalonate (diphospho) decarboxylase                     |
| <b>Mvp</b>     | 78388     | major vault protein                                      |
| <b>Mxd4</b>    | 17122     | Max dimerization protein 4                               |
| <b>Myadm</b>   | 50918     | myeloid-associated differentiation marker                |
| <b>Myadml2</b> | 68515     | myeloid-associated differentiation marker-like 2         |
| <b>Mybph</b>   | 53311     | myosin binding protein H                                 |
| <b>Myl10</b>   | 59310     | myosin, light chain 10, regulatory                       |
| <b>Myo1a</b>   | 432516    | myosin IA                                                |
| <b>Myo9a</b>   | 270163    | myosin IXa                                               |
| <b>Myog</b>    | 17928     | myogenin                                                 |
| <b>Naa35</b>   | 78689     | N(alpha)-acetyltransferase 35, NatC auxiliary subunit    |
| <b>Nalcn</b>   | 338370    | sodium leak channel, non-selective                       |
| <b>Ncapg2</b>  | 76044     | non-SMC condensin II complex, subunit G2                 |
| <b>Nckap5</b>  | 210356    | NCK-associated protein 5                                 |
| <b>Nctc1</b>   | 330677    | non-coding transcript 1                                  |
| <b>Nctc1</b>   | .         | .                                                        |
| <b>Ndnl2</b>   | 66647     | necdin-like 2                                            |
| <b>Ndufa3</b>  | 66091     | NADH dehydrogenase (ubiquinone) 1 alpha subcomplex, 3    |
| <b>Ndufa9</b>  | 66108     | NADH dehydrogenase (ubiquinone) 1 alpha subcomplex, 9    |
| <b>Ndufb2</b>  | 68198     | NADH dehydrogenase (ubiquinone) 1 beta subcomplex, 2     |
| <b>Negr1</b>   | 320840    | neuronal growth regulator 1                              |
| <b>Neurod4</b> | 11923     | neurogenic differentiation 4                             |
| <b>Nfib</b>    | 18028     | nuclear factor I/B                                       |
| <b>Ngdn</b>    | 68966     | neuroguidin, EIF4E binding protein                       |
| <b>Ngf</b>     | 18049     | nerve growth factor                                      |
| <b>Nhsl2</b>   | 100042480 | NHS-like 2                                               |
| <b>Nipal3</b>  | 74552     | NIPA-like domain containing 3                            |
| <b>Nisch</b>   | 64652     | nischarin                                                |
| <b>Nkd1</b>    | 93960     | naked cuticle 1 homolog (Drosophila)                     |
| <b>Nlrp6</b>   | 101613    | NLR family, pyrin domain containing 6                    |
| <b>Nme5</b>    | 75533     | NME/NM23 family member 5                                 |
| <b>Nme9</b>    | .         | .                                                        |
| <b>Nme9</b>    | 623534    | NME/NM23 family member 9                                 |
| <b>Nmnat2</b>  | 226518    | nicotinamide nucleotide adenylyltransferase 2            |

|                |           |                                                                      |
|----------------|-----------|----------------------------------------------------------------------|
| <b>Nmur1</b>   | 14767     | neuromedin U receptor 1                                              |
| <b>Nnat</b>    | 18111     | neuronatin                                                           |
| <b>Nop16</b>   | 28126     | NOP16 nucleolar protein                                              |
| <b>Noxa1</b>   | 241275    | NADPH oxidase activator 1                                            |
| <b>Nphp4</b>   | 260305    | nephronophthisis 4 (juvenile) homolog (human)                        |
| <b>Npl</b>     | 74091     | N-acetylneuraminate pyruvate lyase                                   |
| <b>Nppa</b>    | 230899    | natriuretic peptide type A                                           |
| <b>Nps</b>     | 100043254 | neuropeptide S                                                       |
| <b>Nptxr</b>   | 73340     | neuronal pentraxin receptor                                          |
| <b>Nr1h3</b>   | 22259     | nuclear receptor subfamily 1, group H, member 3                      |
| <b>Nr4a1</b>   | 15370     | nuclear receptor subfamily 4, group A, member 1                      |
| <b>Nr5a2</b>   | 26424     | nuclear receptor subfamily 5, group A, member 2                      |
| <b>Nt5c1a</b>  | 230718    | 5'-nucleotidase, cytosolic IA                                        |
| <b>Nt5e</b>    | 23959     | 5' nucleotidase, ecto                                                |
| <b>Ntm</b>     | 235106    | neurotrimin                                                          |
| <b>Nuak2</b>   | 74137     | NUAK family, SNF1-like kinase, 2                                     |
| <b>Nyap1</b>   | 243300    | neuronal tyrosine-phosphorylated phosphoinositide 3-kinase adaptor 1 |
| <b>Oas1f</b>   | 243262    | 2'-5' oligoadenylate synthetase 1F                                   |
| <b>Oasl1</b>   | 231655    | 2'-5' oligoadenylate synthetase-like 1                               |
| <b>Ocln</b>    | 18260     | occludin                                                             |
| <b>Ogg1</b>    | 18294     | 8-oxoguanine DNA-glycosylase 1                                       |
| <b>Olfm3</b>   | 229759    | olfactomedin 3                                                       |
| <b>Olf1410</b> | 258484    | olfactory receptor 1410                                              |
| <b>Olf1412</b> | 258274    | olfactory receptor 1412                                              |
| <b>Olf1414</b> | 259041    | olfactory receptor 1414                                              |
| <b>Olf1416</b> | 259040    | olfactory receptor 1416                                              |
| <b>Olf214</b>  | 258754    | olfactory receptor 214                                               |
| <b>Olf283</b>  | 259038    | olfactory receptor 283                                               |
| <b>Olf286</b>  | 629524    | olfactory receptor 286                                               |
| <b>Olf287</b>  | 634104    | olfactory receptor 287                                               |
| <b>Olf522</b>  | 258954    | olfactory receptor 522                                               |
| <b>Olf62</b>   | 18363     | olfactory receptor 62                                                |
| <b>Olf632</b>  | 259123    | olfactory receptor 632                                               |
| <b>Opa3</b>    | 403187    | optic atrophy 3                                                      |
| <b>Opn3</b>    | 13603     | opsin 3                                                              |
| <b>Ormdl2</b>  | 66844     | ORM1-like 2 ( <i>S. cerevisiae</i> )                                 |
| <b>Oscar</b>   | 232790    | osteoclast associated receptor                                       |
| <b>Oser1</b>   | 66680     | oxidative stress responsive serine rich 1                            |
| <b>Otub2</b>   | 68149     | OTU domain, ubiquitin aldehyde binding 2                             |
| <b>P2rx7</b>   | 18439     | purinergic receptor P2X, ligand-gated ion channel, 7                 |
| <b>P2ry2</b>   | 18442     | purinergic receptor P2Y, G-protein coupled 2                         |
| <b>Pacsin3</b> | 80708     | protein kinase C and casein kinase substrate in neurons 3            |
| <b>Pafah2</b>  | 100163    | platelet-activating factor acetylhydrolase 2                         |

|                |        |                                                                              |
|----------------|--------|------------------------------------------------------------------------------|
| <b>Pak6</b>    | 214230 | p21 protein (Cdc42/Rac)-activated kinase 6                                   |
| <b>Palmd</b>   | 114301 | palmdelphin                                                                  |
| <b>Papolb</b>  | 56522  | poly (A) polymerase beta (testis specific)                                   |
| <b>Pappa2</b>  | 23850  | pappalysin 2                                                                 |
| <b>Paqr9</b>   | 75552  | progesterin and adipoQ receptor family member IX                             |
| <b>Pard3</b>   | 93742  | par-3 family cell polarity regulator                                         |
| <b>Pars2</b>   | 230577 | prolyl-tRNA synthetase (mitochondrial)(putative)                             |
| <b>Pawr</b>    | 114774 | PRKC, apoptosis, WT1, regulator                                              |
| <b>Pax6</b>    | 18508  | paired box 6                                                                 |
| <b>Pax6os1</b> | 402728 | paired box 6 opposite strand 1                                               |
| <b>Pax6os1</b> | .      | .                                                                            |
| <b>Paxip1</b>  | 55982  | PAX interacting (with transcription-activation domain) protein 1             |
| <b>Pcdh9</b>   | 211712 | protocadherin 9                                                              |
| <b>Pcdhga5</b> | 93713  | protocadherin gamma subfamily A, 5                                           |
| <b>Pcp4</b>    | 18546  | Purkinje cell protein 4                                                      |
| <b>Pcyt1b</b>  | 236899 | phosphate cytidyltransferase 1, choline, beta isoform                        |
| <b>Pdcl</b>    | 67466  | phosducin-like                                                               |
| <b>Pddc1</b>   | 213350 | Parkinson disease 7 domain containing 1                                      |
| <b>Pde10a</b>  | 23984  | phosphodiesterase 10A                                                        |
| <b>Pde1b</b>   | 18574  | phosphodiesterase 1B, Ca <sup>2+</sup> -calmodulin dependent                 |
| <b>Pde3a</b>   | 54611  | phosphodiesterase 3A, cGMP inhibited                                         |
| <b>Pde6h</b>   | 78600  | phosphodiesterase 6H, cGMP-specific, cone, gamma                             |
| <b>Pdia4</b>   | 12304  | protein disulfide isomerase associated 4                                     |
| <b>Pdyn</b>    | 18610  | prodynorphin                                                                 |
| <b>Pes1</b>    | 64934  | pescadillo homolog 1, containing BRCT domain (zebrafish)                     |
| <b>Pfdn4</b>   | 109054 | prefoldin 4                                                                  |
| <b>Pfdn6</b>   | 14976  | prefoldin subunit 6                                                          |
| <b>Pgbd5</b>   | 209966 | piggyBac transposable element derived 5                                      |
| <b>Pgk1</b>    | 18655  | phosphoglycerate kinase 1                                                    |
| <b>Phactr3</b> | 74189  | phosphatase and actin regulator 3                                            |
| <b>Phb</b>     | 18673  | prohibitin                                                                   |
| <b>Phf21a</b>  | 192285 | PHD finger protein 21A                                                       |
| <b>Phf5a</b>   | 68479  | PHD finger protein 5A                                                        |
| <b>Phip</b>    | 83946  | pleckstrin homology domain interacting protein                               |
| <b>Pianp</b>   | 319352 | PILR alpha associated neural protein                                         |
| <b>Pid1</b>    | 98496  | phosphotyrosine interaction domain containing 1                              |
| <b>Pik3cd</b>  | 18707  | phosphatidylinositol 3-kinase catalytic delta polypeptide                    |
| <b>Pin4</b>    | 69713  | protein (peptidyl-prolyl cis/trans isomerase) NIMA-interacting, 4 (parvulin) |
| <b>Pitpnm2</b> | 19679  | phosphatidylinositol transfer protein, membrane-associated 2                 |
| <b>Piwil1</b>  | 57749  | piwi-like RNA-mediated gene silencing 1                                      |
| <b>Pklr</b>    | 18770  | pyruvate kinase liver and red blood cell                                     |
| <b>Pla2g2a</b> | 18780  | phospholipase A2, group IIA (platelets, synovial fluid)                      |
| <b>Pla2g2a</b> | .      | .                                                                            |

|                   |           |                                                                                                           |
|-------------------|-----------|-----------------------------------------------------------------------------------------------------------|
| <b>Pla2g2d</b>    | 18782     | phospholipase A2, group IID                                                                               |
| <b>Plcx1</b>      | 403178    | phosphatidylinositol-specific phospholipase C, X domain containing 1                                      |
| <b>Plk2</b>       | 20620     | polo-like kinase 2                                                                                        |
| <b>Pls1</b>       | 102502    | plastin 1 (I-isoform)                                                                                     |
| <b>Plxna1</b>     | 18844     | plexin A1                                                                                                 |
| <b>Pmvk</b>       | 68603     | phosphomevalonate kinase                                                                                  |
| <b>Polg</b>       | 18975     | polymerase (DNA directed), gamma                                                                          |
| <b>Polh</b>       | 80905     | polymerase (DNA directed), eta (RAD 30 related)                                                           |
| <b>Polr3gl</b>    | 69870     | polymerase (RNA) III (DNA directed) polypeptide G like                                                    |
| <b>Pou3f1</b>     | 18991     | POU domain, class 3, transcription factor 1                                                               |
| <b>Pou6f1</b>     | 19009     | POU domain, class 6, transcription factor 1                                                               |
| <b>Pparg</b>      | 19016     | peroxisome proliferator activated receptor gamma                                                          |
| <b>Ppfia4</b>     | 68507     | protein tyrosine phosphatase, receptor type, f polypeptide (PTPRF), interacting protein (liprin), alpha 4 |
| <b>Ppfibp1</b>    | 67533     | PTPRF interacting protein, binding protein 1 (liprin beta 1)                                              |
| <b>Ppif</b>       | 105675    | peptidylprolyl isomerase F (cyclophilin F)                                                                |
| <b>Ppip5k2</b>    | 227399    | diphosphoinositol pentakisphosphate kinase 2                                                              |
| <b>Ppp1r14d</b>   | 72112     | protein phosphatase 1, regulatory (inhibitor) subunit 14D                                                 |
| <b>Ppp4r1l-ps</b> | .         | .                                                                                                         |
| <b>Ppp4r1l-ps</b> | 100043911 | protein phosphatase 4, regulatory subunit 1-like, pseudogene                                              |
| <b>Ppp4r4</b>     | 74521     | protein phosphatase 4, regulatory subunit 4                                                               |
| <b>Pptc7</b>      | 320717    | PTC7 protein phosphatase homolog (S. cerevisiae)                                                          |
| <b>Ppy</b>        | 19064     | pancreatic polypeptide                                                                                    |
| <b>Prex1</b>      | 277360    | phosphatidylinositol-3,4,5-trisphosphate-dependent Rac exchange factor 1                                  |
| <b>Prickle2</b>   | 243548    | prickle homolog 2 (Drosophila)                                                                            |
| <b>Prkcb</b>      | 18751     | protein kinase C, beta                                                                                    |
| <b>Prkce</b>      | 18754     | protein kinase C, epsilon                                                                                 |
| <b>Prmt8</b>      | 381813    | protein arginine N-methyltransferase 8                                                                    |
| <b>Prok1</b>      | 246691    | prokineticin 1                                                                                            |
| <b>Prss36</b>     | 77613     | protease, serine 36                                                                                       |
| <b>Psma2</b>      | 19166     | proteasome (prosome, macropain) subunit, alpha type 2                                                     |
| <b>Psmb6</b>      | 19175     | proteasome (prosome, macropain) subunit, beta type 6                                                      |
| <b>Psm10</b>      | 53380     | proteasome (prosome, macropain) 26S subunit, non-ATPase, 10                                               |
| <b>Ptbp1</b>      | 19205     | polypyrimidine tract binding protein 1                                                                    |
| <b>Ptger3</b>     | 19218     | prostaglandin E receptor 3 (subtype EP3)                                                                  |
| <b>Pth1r</b>      | 19228     | parathyroid hormone 1 receptor                                                                            |
| <b>Ptp4a3</b>     | 19245     | protein tyrosine phosphatase 4a3                                                                          |
| <b>Ptpre</b>      | 19267     | protein tyrosine phosphatase, receptor type, E                                                            |
| <b>Ptpn</b>       | 19275     | protein tyrosine phosphatase, receptor type, N                                                            |
| <b>Purb</b>       | 19291     | purine rich element binding protein B                                                                     |
| <b>Pxylp1</b>     | 235534    | 2-phosphoxylose phosphatase 1                                                                             |
| <b>Pycr1</b>      | 209027    | pyrroline-5-carboxylate reductase 1                                                                       |
| <b>Qrfpr</b>      | 229214    | pyroglutamylated RFamide peptide receptor                                                                 |

|                |        |                                                                            |
|----------------|--------|----------------------------------------------------------------------------|
| <b>R74862</b>  | 97423  | expressed sequence R74862                                                  |
| <b>R74862</b>  | .      | .                                                                          |
| <b>Rab22a</b>  | 19334  | RAB22A, member RAS oncogene family                                         |
| <b>Rab7</b>    | 19349  | RAB7, member RAS oncogene family                                           |
| <b>Rac3</b>    | 170758 | RAS-related C3 botulinum substrate 3                                       |
| <b>Rad51b</b>  | 19363  | RAD51 homolog B                                                            |
| <b>Ralgps2</b> | 78255  | Ral GEF with PH domain and SH3 binding motif 2                             |
| <b>Ranbp1</b>  | 19385  | RAN binding protein 1                                                      |
| <b>Rapsn</b>   | 19400  | receptor-associated protein of the synapse                                 |
| <b>Rara</b>    | 19401  | retinoic acid receptor, alpha                                              |
| <b>Rarg</b>    | 19411  | retinoic acid receptor, gamma                                              |
| <b>Rasgrp3</b> | 240168 | RAS, guanyl releasing protein 3                                            |
| <b>Rasl1a</b>  | 68895  | RAS-like, family 11, member A                                              |
| <b>Rassf10</b> | 78748  | Ras association (RalGDS/AF-6) domain family (N-terminal) member 10         |
| <b>Raver2</b>  | 242570 | ribonucleoprotein, PTB-binding 2                                           |
| <b>Rbm12b2</b> | 77604  | RNA binding motif protein 12 B2                                            |
| <b>Rbm15</b>   | 229700 | RNA binding motif protein 15                                               |
| <b>Rbm27</b>   | 225432 | RNA binding motif protein 27                                               |
| <b>Rbp1</b>    | 19659  | retinol binding protein 1, cellular                                        |
| <b>Rbp7</b>    | 63954  | retinol binding protein 7, cellular                                        |
| <b>Rcn1</b>    | 19672  | reticulocalbin 1                                                           |
| <b>Rcsd1</b>   | 226594 | RCSD domain containing 1                                                   |
| <b>Reep4</b>   | 72549  | receptor accessory protein 4                                               |
| <b>Rer1</b>    | 67830  | RER1 retention in endoplasmic reticulum 1 homolog ( <i>S. cerevisiae</i> ) |
| <b>Rfx4</b>    | 71137  | regulatory factor X, 4 (influences HLA class II expression)                |
| <b>Rfxank</b>  | 19727  | regulatory factor X-associated ankyrin-containing protein                  |
| <b>Rgs19</b>   | 56470  | regulator of G-protein signaling 19                                        |
| <b>Rgs7bp</b>  | 52882  | regulator of G-protein signalling 7 binding protein                        |
| <b>Rhbdf2</b>  | 217344 | rhomboid 5 homolog 2 ( <i>Drosophila</i> )                                 |
| <b>Rheb</b>    | 19744  | Ras homolog enriched in brain                                              |
| <b>Ric3</b>    | 320360 | resistance to inhibitors of cholinesterase 3 homolog ( <i>C. elegans</i> ) |
| <b>Rimbp2</b>  | 231760 | RIMS binding protein 2                                                     |
| <b>Rimk1a</b>  | 194237 | ribosomal modification protein rimK-like family member A                   |
| <b>Rims3</b>   | 242662 | regulating synaptic membrane exocytosis 3                                  |
| <b>Ripply2</b> | 382089 | rippy2 homolog (zebrafish)                                                 |
| <b>Rnf152</b>  | 320311 | ring finger protein 152                                                    |
| <b>Rnf40</b>   | 233900 | ring finger protein 40                                                     |
| <b>Rnh1</b>    | 107702 | ribonuclease/angiogenin inhibitor 1                                        |
| <b>Rnmt</b>    | 67897  | RNA (guanine-7-) methyltransferase                                         |
| <b>Rnps1</b>   | 19826  | ribonucleic acid binding protein S1                                        |
| <b>Robo3</b>   | 19649  | roundabout homolog 3 ( <i>Drosophila</i> )                                 |
| <b>Rpl35</b>   | 66489  | ribosomal protein L35                                                      |
| <b>Rpl41</b>   | 67945  | ribosomal protein L41                                                      |



|                 |           |                                                                                        |
|-----------------|-----------|----------------------------------------------------------------------------------------|
| <b>Rprml</b>    | 104582    | reprimin-like                                                                          |
| <b>Rps4x</b>    | 20102     | ribosomal protein S4, X-linked                                                         |
| <b>Rps5</b>     | 20103     | ribosomal protein S5                                                                   |
| <b>Rps6ka2</b>  | 20112     | ribosomal protein S6 kinase, polypeptide 2                                             |
| <b>Rps6ka4</b>  | 56613     | ribosomal protein S6 kinase, polypeptide 4                                             |
| <b>Rps9</b>     | 76846     | ribosomal protein S9                                                                   |
| <b>Rras</b>     | 20130     | Harvey rat sarcoma oncogene, subgroup R                                                |
| <b>Rsrp1</b>    | 27981     | arginine/serine rich protein 1                                                         |
| <b>Rtfdc1</b>   | 66404     | replication termination factor 2 domain containing 1                                   |
| <b>Rtn4r</b>    | 65079     | reticulon 4 receptor                                                                   |
| <b>Rusc1</b>    | 72296     | RUN and SH3 domain containing 1                                                        |
| <b>Rxfp2</b>    | 140498    | relaxin/insulin-like family peptide receptor 2                                         |
| <b>Rxrg</b>     | 20183     | retinoid X receptor gamma                                                              |
| <b>Rybp</b>     | 56353     | RING1 and YY1 binding protein                                                          |
| <b>S100a1</b>   | 20193     | S100 calcium binding protein A1                                                        |
| <b>S100a13</b>  | 20196     | S100 calcium binding protein A13                                                       |
| <b>S100a16</b>  | 67860     | S100 calcium binding protein A16                                                       |
| <b>S100g</b>    | 12309     | S100 calcium binding protein G                                                         |
| <b>Samd14</b>   | 217125    | sterile alpha motif domain containing 14                                               |
| <b>Samd4b</b>   | 233033    | sterile alpha motif domain containing 4B                                               |
| <b>Sap130</b>   | 269003    | Sin3A associated protein                                                               |
| <b>Sarnp</b>    | 66118     | SAP domain containing ribonucleoprotein                                                |
| <b>Scaf1</b>    | 233208    | SR-related CTD-associated factor 1                                                     |
| <b>Scara5</b>   | 71145     | scavenger receptor class A, member 5 (putative)                                        |
| <b>Scarna17</b> | 100217466 | small Cajal body-specific RNA 17                                                       |
| <b>Scarna17</b> | .         | .                                                                                      |
| <b>Scd1</b>     | 20249     | stearoyl-Coenzyme A desaturase 1                                                       |
| <b>Scgb1c1</b>  | 338417    | secretoglobin, family 1C, member 1                                                     |
| <b>Scn10a</b>   | 20264     | sodium channel, voltage-gated, type X, alpha                                           |
| <b>Scn2b</b>    | 72821     | sodium channel, voltage-gated, type II, beta                                           |
| <b>Scnn1b</b>   | 20277     | sodium channel, nonvoltage-gated 1 beta                                                |
| <b>Sec1</b>     | 56546     | secretory blood group 1                                                                |
| <b>Sec24d</b>   | 69608     | Sec24 related gene family, member D (S. cerevisiae)                                    |
| <b>Sec61a1</b>  | 53421     | Sec61 alpha 1 subunit (S. cerevisiae)                                                  |
| <b>Selk</b>     | 80795     | selenoprotein K                                                                        |
| <b>Selplg</b>   | 20345     | selectin, platelet (p-selectin) ligand                                                 |
| <b>Sema3f</b>   | 20350     | sema domain, immunoglobulin domain (Ig), short basic domain, secreted, (semaphorin) 3F |
| <b>Sema6c</b>   | 20360     | sema domain, transmembrane domain (TM), and cytoplasmic domain, (semaphorin) 6C        |
| <b>Senp8</b>    | 71599     | SUMO/sentrin specific peptidase 8                                                      |
| <b>Sep-11</b>   | 52398     | septin 11                                                                              |
| <b>Serinc2</b>  | 230779    | serine incorporator 2                                                                  |

|                  |        |                                                                                                    |
|------------------|--------|----------------------------------------------------------------------------------------------------|
| <b>Serpina10</b> | 217847 | serine (or cysteine) peptidase inhibitor, clade A (alpha-1 antiproteinase, antitrypsin), member 10 |
| <b>Serpinf1</b>  | 20317  | serine (or cysteine) peptidase inhibitor, clade F, member 1                                        |
| <b>Serpinh1</b>  | 12406  | serine (or cysteine) peptidase inhibitor, clade H, member 1                                        |
| <b>Setd6</b>     | 66083  | SET domain containing 6                                                                            |
| <b>Sf3b2</b>     | 319322 | splicing factor 3b, subunit 2                                                                      |
| <b>Sfn</b>       | 55948  | stratifin                                                                                          |
| <b>Sh2b3</b>     | 16923  | SH2B adaptor protein 3                                                                             |
| <b>Sh3gl2</b>    | 20404  | SH3-domain GRB2-like 2                                                                             |
| <b>Sh3kbp1</b>   | 58194  | SH3-domain kinase binding protein 1                                                                |
| <b>Shank3</b>    | 58234  | SH3/ankyrin domain gene 3                                                                          |
| <b>Shroom2</b>   | 110380 | shroom family member 2                                                                             |
| <b>Skap1</b>     | 78473  | src family associated phosphoprotein 1                                                             |
| <b>Slain1</b>    | 105439 | SLAIN motif family, member 1                                                                       |
| <b>Slamf8</b>    | 74748  | SLAM family member 8                                                                               |
| <b>Slc11a2</b>   | 18174  | solute carrier family 11 (proton-coupled divalent metal ion transporters), member 2                |
| <b>Slc12a5</b>   | 57138  | solute carrier family 12, member 5                                                                 |
| <b>Slc16a6</b>   | 104681 | solute carrier family 16 (monocarboxylic acid transporters), member 6                              |
| <b>Slc1a3</b>    | 20512  | solute carrier family 1 (glial high affinity glutamate transporter), member 3                      |
| <b>Slc25a17</b>  | 20524  | solute carrier family 25 (mitochondrial carrier, peroxisomal membrane protein), member 17          |
| <b>Slc25a32</b>  | 69906  | solute carrier family 25, member 32                                                                |
| <b>Slc25a45</b>  | 107375 | solute carrier family 25, member 45                                                                |
| <b>Slc26a11</b>  | 268512 | solute carrier family 26, member 11                                                                |
| <b>Slc2a13</b>   | 239606 | solute carrier family 2 (facilitated glucose transporter), member 13                               |
| <b>Slc2a3</b>    | 20527  | solute carrier family 2 (facilitated glucose transporter), member 3                                |
| <b>Slc2a9</b>    | 117591 | solute carrier family 2 (facilitated glucose transporter), member 9                                |
| <b>Slc30a10</b>  | 226781 | solute carrier family 30, member 10                                                                |
| <b>Slc35g2</b>   | 245020 | solute carrier family 35, member G2                                                                |
| <b>Slc38a2</b>   | 67760  | solute carrier family 38, member 2                                                                 |
| <b>Slc38a7</b>   | 234595 | solute carrier family 38, member 7                                                                 |
| <b>Slc39a9</b>   | 328133 | solute carrier family 39 (zinc transporter), member 9                                              |
| <b>Slc3a1</b>    | 20532  | solute carrier family 3, member 1                                                                  |
| <b>Slc45a1</b>   | 242773 | solute carrier family 45, member 1                                                                 |
| <b>Slc45a3</b>   | 212980 | solute carrier family 45, member 3                                                                 |
| <b>Slc48a1</b>   | 67739  | solute carrier family 48 (heme transporter), member 1                                              |
| <b>Slc4a1</b>    | 20533  | solute carrier family 4 (anion exchanger), member 1                                                |
| <b>Slc52a3</b>   | 69698  | solute carrier protein family 52, member 3                                                         |
| <b>Slc5a3</b>    | 53881  | solute carrier family 5 (inositol transporters), member 3                                          |
| <b>Slc6a15</b>   | 103098 | solute carrier family 6 (neurotransmitter transporter), member 15                                  |
| <b>Slc6a2</b>    | 20538  | solute carrier family 6 (neurotransmitter transporter, noradrenalin), member 2                     |
| <b>Slc7a1</b>    | 11987  | solute carrier family 7 (cationic amino acid transporter, y <sup>+</sup> system), member 1         |

|                 |           |                                                                                                   |
|-----------------|-----------|---------------------------------------------------------------------------------------------------|
| <b>Slc9a5</b>   | 277973    | solute carrier family 9 (sodium/hydrogen exchanger), member 5                                     |
| <b>Slpi</b>     | 20568     | secretory leukocyte peptidase inhibitor                                                           |
| <b>Smad5</b>    | 17129     | SMAD family member 5                                                                              |
| <b>Smardc1</b>  | 83797     | SWI/SNF related, matrix associated, actin dependent regulator of chromatin, subfamily d, member 1 |
| <b>Smco3</b>    | 654818    | single-pass membrane protein with coiled-coil domains 3                                           |
| <b>Smg5</b>     | 229512    | Smg-5 homolog, nonsense mediated mRNA decay factor ( <i>C. elegans</i> )                          |
| <b>Smg9</b>     | 71997     | smg-9 homolog, nonsense mediated mRNA decay factor ( <i>C. elegans</i> )                          |
| <b>Smpd3</b>    | 58994     | sphingomyelin phosphodiesterase 3, neutral                                                        |
| <b>Smtnl1</b>   | 68678     | smoothelin-like 1                                                                                 |
| <b>Snf8</b>     | 27681     | SNF8, ESCRT-II complex subunit, homolog ( <i>S. cerevisiae</i> )                                  |
| <b>Snhg12</b>   | 100039864 | small nucleolar RNA host gene 12                                                                  |
| <b>Snhg12</b>   | .         | .                                                                                                 |
| <b>Snhg7</b>    | 72091     | small nucleolar RNA host gene 7                                                                   |
| <b>Snhg7</b>    | .         | .                                                                                                 |
| <b>Snip1</b>    | 76793     | Smad nuclear interacting protein 1                                                                |
| <b>Snora16a</b> | 100310813 | small nucleolar RNA, H/ACA box 16A                                                                |
| <b>Snora16a</b> | .         | .                                                                                                 |
| <b>Snora17</b>  | .         | .                                                                                                 |
| <b>Snora17</b>  | .         | .                                                                                                 |
| <b>Snora17</b>  | .         | .                                                                                                 |
| <b>Snora17</b>  | .         | .                                                                                                 |
| <b>Snora17</b>  | .         | .                                                                                                 |
| <b>Snora17</b>  | .         | .                                                                                                 |
| <b>Snora17</b>  | 100306954 | small nucleolar RNA, H/ACA box 17                                                                 |
| <b>Snora43</b>  | .         | .                                                                                                 |
| <b>Snora43</b>  | .         | .                                                                                                 |
| <b>Snora43</b>  | .         | .                                                                                                 |
| <b>Snora43</b>  | .         | .                                                                                                 |
| <b>Snora43</b>  | .         | .                                                                                                 |
| <b>Snora43</b>  | 100306955 | small nucleolar RNA, H/ACA box 43                                                                 |
| <b>Snora44</b>  | .         | .                                                                                                 |
| <b>Snora44</b>  | 100217418 | small nucleolar RNA, H/ACA box 44                                                                 |
| <b>Snora47</b>  | 100217450 | small nucleolar RNA, H/ACA box 47                                                                 |
| <b>Snora47</b>  | .         | .                                                                                                 |
| <b>Snora61</b>  | 100217440 | small nucleolar RNA, H/ACA box 61                                                                 |
| <b>Snora61</b>  | .         | .                                                                                                 |
| <b>Snord99</b>  | .         | .                                                                                                 |
| <b>Snord99</b>  | 100217437 | small nucleolar RNA, C/D box 99                                                                   |
| <b>Sox21</b>    | 223227    | SRY (sex determining region Y)-box 21                                                             |
| <b>Sp2</b>      | 78912     | Sp2 transcription factor                                                                          |
| <b>Sp7</b>      | 170574    | Sp7 transcription factor 7                                                                        |
| <b>Sp8</b>      | 320145    | trans-acting transcription factor 8                                                               |

|                   |        |                                                                                                              |
|-------------------|--------|--------------------------------------------------------------------------------------------------------------|
| <b>Spn</b>        | 56381  | SPEN homolog, transcriptional regulator ( <i>Drosophila</i> )                                                |
| <b>Spn-ps</b>     | 20738  | sialophorin, pseudogene                                                                                      |
| <b>Spns2</b>      | 216892 | spinster homolog 2                                                                                           |
| <b>Spo11</b>      | 26972  | SPO11 meiotic protein covalently bound to DSB homolog ( <i>S. cerevisiae</i> )                               |
| <b>Sppl3</b>      | 74585  | signal peptide peptidase 3                                                                                   |
| <b>Spz1</b>       | 79401  | spermatogenic leucine zipper 1                                                                               |
| <b>Srcin1</b>     | 56013  | SRC kinase signaling inhibitor 1                                                                             |
| <b>Srek1ip1</b>   | 67288  | splicing regulatory glutamine/lysine-rich protein 1 interacting protein 1                                    |
| <b>Srrm1</b>      | 51796  | serine/arginine repetitive matrix 1                                                                          |
| <b>St6galnac3</b> | 20447  | ST6 (alpha-N-acetyl-neuraminyl-2,3-beta-galactosyl-1,3)-N-acetylglactosaminide alpha-2,6-sialyltransferase 3 |
| <b>Stampb</b>     | 70527  | STAM binding protein                                                                                         |
| <b>Star</b>       | 20845  | steroidogenic acute regulatory protein                                                                       |
| <b>Ston2</b>      | 108800 | stonin 2                                                                                                     |
| <b>Stpg1</b>      | 78806  | sperm tail PG rich repeat containing 1                                                                       |
| <b>Strip2</b>     | 320609 | striatin interacting protein 2                                                                               |
| <b>Suclg2</b>     | 20917  | succinate-Coenzyme A ligase, GDP-forming, beta subunit                                                       |
| <b>Supt4a</b>     | 20922  | suppressor of Ty 4A                                                                                          |
| <b>Susd4</b>      | 96935  | sushi domain containing 4                                                                                    |
| <b>Susd5</b>      | 382111 | sushi domain containing 5                                                                                    |
| <b>Svop</b>       | 68666  | SV2 related protein                                                                                          |
| <b>Syce2</b>      | 71846  | synaptonemal complex central element protein 2                                                               |
| <b>Syce3</b>      | 75459  | synaptonemal complex central element protein 3                                                               |
| <b>Sycp1</b>      | 20957  | synaptonemal complex protein 1                                                                               |
| <b>Syne2</b>      | 319565 | spectrin repeat containing, nuclear envelope 2                                                               |
| <b>Syne3</b>      | 212073 | spectrin repeat containing, nuclear envelope family member 3                                                 |
| <b>Syngr1</b>     | 20972  | synaptogyrin 1                                                                                               |
| <b>Syt14</b>      | 329324 | synaptotagmin XIV                                                                                            |
| <b>Syt17</b>      | 110058 | synaptotagmin XVII                                                                                           |
| <b>Syt9</b>       | 60510  | synaptotagmin IX                                                                                             |
| <b>Sytl1</b>      | 269589 | synaptotagmin-like 1                                                                                         |
| <b>Sytl2</b>      | 83671  | synaptotagmin-like 2                                                                                         |
| <b>Tac4</b>       | 93670  | tachykinin 4                                                                                                 |
| <b>Taf10</b>      | 24075  | TAF10 RNA polymerase II, TATA box binding protein (TBP)-associated factor                                    |
| <b>Taf8</b>       | 63856  | TAF8 RNA polymerase II, TATA box binding protein (TBP)-associated factorq                                    |
| <b>Taldo1</b>     | 21351  | transaldolase 1                                                                                              |
| <b>Tapbp</b>      | 21356  | TAP binding protein                                                                                          |
| <b>Tbc1d22a</b>   | 223754 | TBC1 domain family, member 22a                                                                               |
| <b>Tbc1d9</b>     | 71310  | TBC1 domain family, member 9                                                                                 |
| <b>Tbce</b>       | 70430  | tubulin-specific chaperone E                                                                                 |
| <b>Tbkbp1</b>     | 73174  | TBK1 binding protein 1                                                                                       |
| <b>Tbrg4</b>      | 21379  | transforming growth factor beta regulated gene 4                                                             |

|                   |           |                                                                                          |
|-------------------|-----------|------------------------------------------------------------------------------------------|
| <b>Tbx19</b>      | 83993     | T-box 19                                                                                 |
| <b>Tbx22</b>      | 245572    | T-box 22                                                                                 |
| <b>Tbx3os2</b>    | .         | .                                                                                        |
| <b>Tbx3os2</b>    | 433944    | T-box 3, opposite strand 2                                                               |
| <b>Tceal5</b>     | 331532    | transcription elongation factor A (SII)-like 5                                           |
| <b>Tceal8</b>     | 66684     | transcription elongation factor A (SII)-like 8                                           |
| <b>Tcirg1</b>     | 27060     | T cell, immune regulator 1, ATPase, H <sup>+</sup> transporting, lysosomal V0 protein A3 |
| <b>Tcp1</b>       | 21454     | t-complex protein 1                                                                      |
| <b>Tctex1d1</b>   | 67344     | Tctex1 domain containing 1                                                               |
| <b>Tctex1d4</b>   | 242646    | Tctex1 domain containing 4                                                               |
| <b>Tdp2</b>       | 56196     | tyrosyl-DNA phosphodiesterase 2                                                          |
| <b>Tead1</b>      | 21676     | TEA domain family member 1                                                               |
| <b>Tesc</b>       | 57816     | tescalcin                                                                                |
| <b>Tet2</b>       | 214133    | tet methylcytosine dioxygenase 2                                                         |
| <b>Tex13a</b>     | 67944     | testis expressed 13A                                                                     |
| <b>Tfb2m</b>      | 15278     | transcription factor B2, mitochondrial                                                   |
| <b>Tfcp2l1</b>    | 81879     | transcription factor CP2-like 1                                                          |
| <b>Tgfb1i1</b>    | 21804     | transforming growth factor beta 1 induced transcript 1                                   |
| <b>Tgif1</b>      | 21815     | TGFB-induced factor homeobox 1                                                           |
| <b>Tgoln1</b>     | 22134     | trans-golgi network protein                                                              |
| <b>Tgoln2</b>     | 22135     | trans-golgi network protein 2                                                            |
| <b>Tgtp1</b>      | 21822     | T cell specific GTPase 1                                                                 |
| <b>Tgtp2</b>      | 100039796 | T cell specific GTPase 2                                                                 |
| <b>Thbs2</b>      | 21826     | thrombospondin 2                                                                         |
| <b>Ticam1</b>     | 106759    | toll-like receptor adaptor molecule 1                                                    |
| <b>Timm10</b>     | 30059     | translocase of inner mitochondrial membrane 10                                           |
| <b>Timp3</b>      | 21859     | tissue inhibitor of metalloproteinase 3                                                  |
| <b>Tmed1</b>      | 17083     | transmembrane emp24 domain containing 1                                                  |
| <b>Tmem100</b>    | 67888     | transmembrane protein 100                                                                |
| <b>Tmem116</b>    | 77462     | transmembrane protein 116                                                                |
| <b>Tmem120a</b>   | 215210    | transmembrane protein 120A                                                               |
| <b>Tmem121</b>    | 69195     | transmembrane protein 121                                                                |
| <b>Tmem132a</b>   | 98170     | transmembrane protein 132A                                                               |
| <b>Tmem132cos</b> | 67351     | transmembrane protein 132C, opposite strand                                              |
| <b>Tmem132cos</b> | .         | .                                                                                        |
| <b>Tmem132d</b>   | 243274    | transmembrane protein 132D                                                               |
| <b>Tmem138</b>    | 72982     | transmembrane protein 138                                                                |
| <b>Tmem177</b>    | 66343     | transmembrane protein 177                                                                |
| <b>Tmem179</b>    | 104885    | transmembrane protein 179                                                                |
| <b>Tmem258</b>    | 69038     | transmembrane protein 258                                                                |
| <b>Tmem259</b>    | 216157    | transmembrane protein 259                                                                |
| <b>Tmem51</b>     | 214359    | transmembrane protein 51                                                                 |

|                  |           |                                                          |
|------------------|-----------|----------------------------------------------------------|
| <b>Tmem51os1</b> | 100038693 | Tmem51 opposite strand 1                                 |
| <b>Tmem51os1</b> | .         | .                                                        |
| <b>Tmem54</b>    | 66260     | transmembrane protein 54                                 |
| <b>Tmem67</b>    | 329795    | transmembrane protein 67                                 |
| <b>Tmem87a</b>   | 211499    | transmembrane protein 87A                                |
| <b>Tmem88b</b>   | 320587    | transmembrane protein 88B                                |
| <b>Tmprss12</b>  | 75002     | transmembrane (C-terminal) protease, serine 12           |
| <b>Tmsb4x</b>    | 19241     | thymosin, beta 4, X chromosome                           |
| <b>Tmtc2</b>     | 278279    | transmembrane and tetratricopeptide repeat containing 2  |
| <b>Tmx2</b>      | 66958     | thioredoxin-related transmembrane protein 2              |
| <b>Tnfrsf9</b>   | 21942     | tumor necrosis factor receptor superfamily, member 9     |
| <b>Tnnc1</b>     | 21924     | troponin C, cardiac/slow skeletal                        |
| <b>Tpcn2</b>     | 233979    | two pore segment channel 2                               |
| <b>Tpp1</b>      | 12751     | tripeptidyl peptidase I                                  |
| <b>Tppp3</b>     | 67971     | tubulin polymerization-promoting protein family member 3 |
| <b>Tpra1</b>     | 24100     | transmembrane protein, adipocyte associated 1            |
| <b>Traf7</b>     | 224619    | TNF receptor-associated factor 7                         |
| <b>Traip</b>     | 22036     | TRAF-interacting protein                                 |
| <b>Tram111</b>   | 229801    | translocation associated membrane protein 1-like 1       |
| <b>Trap1a</b>    | 22037     | tumor rejection antigen P1A                              |
| <b>Trappc8</b>   | 75964     | trafficking protein particle complex 8                   |
| <b>Trib3</b>     | 228775    | tribbles homolog 3 (Drosophila)                          |
| <b>Trim46</b>    | 360213    | tripartite motif-containing 46                           |
| <b>Trim52</b>    | 212085    | tripartite motif-containing 52                           |
| <b>Trim67</b>    | 330863    | tripartite motif-containing 67                           |
| <b>Trnp1</b>     | 69539     | TMF1-regulated nuclear protein 1                         |
| <b>Troap</b>     | 78733     | trophinin associated protein                             |
| <b>Tsc22d4</b>   | 78829     | TSC22 domain family, member 4                            |
| <b>Tspan11</b>   | 68498     | tetraspanin 11                                           |
| <b>Tspan18</b>   | 241556    | tetraspanin 18                                           |
| <b>Tspan31</b>   | 67125     | tetraspanin 31                                           |
| <b>Tsr1</b>      | 104662    | TSR1 20S rRNA accumulation                               |
| <b>Tssk3</b>     | 58864     | testis-specific serine kinase 3                          |
| <b>Tsx</b>       | 22127     | testis specific X-linked gene                            |
| <b>Ttc25</b>     | 74407     | tetratricopeptide repeat domain 25                       |
| <b>Ttl9</b>      | 74711     | tubulin tyrosine ligase-like family, member 9            |
| <b>Tuba8</b>     | 53857     | tubulin, alpha 8                                         |
| <b>Tut1</b>      | 70044     | terminal uridylyl transferase 1, U6 snRNA-specific       |
| <b>Txlng</b>     | 353170    | taxilin gamma                                            |
| <b>Tyw1</b>      | 100929    | tRNA-yW synthesizing protein 1 homolog (S. cerevisiae)   |
| <b>Ubap2l</b>    | 74383     | ubiquitin-associated protein 2-like                      |
| <b>Ubox5</b>     | 140629    | U box domain containing 5                                |
| <b>Ucp2</b>      | 22228     | uncoupling protein 2 (mitochondrial, proton carrier)     |

|                |        |                                                                                  |
|----------------|--------|----------------------------------------------------------------------------------|
| <b>Ufc1</b>    | 66155  | ubiquitin-fold modifier conjugating enzyme 1                                     |
| <b>Unc5c</b>   | 22253  | unc-5 homolog C ( <i>C. elegans</i> )                                            |
| <b>Upp2</b>    | 76654  | uridine phosphorylase 2                                                          |
| <b>Urad</b>    | 231903 | ureidoimidazoline (2-oxo-4-hydroxy-4-carboxy-5) decarboxylase                    |
| <b>Urb1</b>    | 207932 | URB1 ribosome biogenesis 1 homolog ( <i>S. cerevisiae</i> )                      |
| <b>Usp12</b>   | 22217  | ubiquitin specific peptidase 12                                                  |
| <b>Usp19</b>   | 71472  | ubiquitin specific peptidase 19                                                  |
| <b>Usp35</b>   | 244144 | ubiquitin specific peptidase 35                                                  |
| <b>Usp5</b>    | 22225  | ubiquitin specific peptidase 5 (isopeptidase T)                                  |
| <b>Utp3</b>    | 65961  | UTP3, small subunit (SSU) processome component, homolog ( <i>S. cerevisiae</i> ) |
| <b>Vac14</b>   | 234729 | Vac14 homolog ( <i>S. cerevisiae</i> )                                           |
| <b>Vash1</b>   | 238328 | vasohibin 1                                                                      |
| <b>Vdr</b>     | 22337  | vitamin D receptor                                                               |
| <b>Vmn2r9</b>  | 435864 | vomer nasal 2, receptor 9                                                        |
| <b>Vrk1</b>    | 22367  | vaccinia related kinase 1                                                        |
| <b>Vsig1</b>   | 78789  | V-set and immunoglobulin domain containing 1                                     |
| <b>Vsig8</b>   | 240916 | V-set and immunoglobulin domain containing 8                                     |
| <b>Vstm2l</b>  | 277432 | V-set and transmembrane domain containing 2-like                                 |
| <b>Vwa1</b>    | 246228 | von Willebrand factor A domain containing 1                                      |
| <b>Vwf</b>     | 22371  | Von Willebrand factor homolog                                                    |
| <b>Wbscr17</b> | 212996 | Williams-Beuren syndrome chromosome region 17 homolog (human)                    |
| <b>Wbscr28</b> | 76629  | Williams-Beuren syndrome chromosome region 28 (human)                            |
| <b>Wdr34</b>   | 71820  | WD repeat domain 34                                                              |
| <b>Wdr46</b>   | 57315  | WD repeat domain 46                                                              |
| <b>Wdr55</b>   | 67936  | WD repeat domain 55                                                              |
| <b>Wdr81</b>   | 192652 | WD repeat domain 81                                                              |
| <b>Wfdc11</b>  | 629761 | WAP four-disulfide core domain 11                                                |
| <b>Wfikkn2</b> | 278507 | WAP, follistatin/kazal, immunoglobulin, kunitz and netrin domain containing 2    |
| <b>Wipfl</b>   | 215280 | WAS/WASL interacting protein family, member 1                                    |
| <b>Wnt4</b>    | 22417  | wingless-type MMTV integration site family, member 4                             |
| <b>Wnt7a</b>   | 22421  | wingless-type MMTV integration site family, member 7A                            |
| <b>Wscd2</b>   | 320916 | WSC domain containing 2                                                          |
| <b>Xbp1</b>    | 22433  | X-box binding protein 1                                                          |
| <b>Xpo5</b>    | 72322  | exportin 5                                                                       |
| <b>Zbtb22</b>  | 81630  | zinc finger and BTB domain containing 22                                         |
| <b>Zbtb40</b>  | 230848 | zinc finger and BTB domain containing 40                                         |
| <b>Zbtb46</b>  | 72147  | zinc finger and BTB domain containing 46                                         |
| <b>Zbtb8a</b>  | 73680  | zinc finger and BTB domain containing 8a                                         |
| <b>Zc3h10</b>  | 103284 | zinc finger CCCH type containing 10                                              |
| <b>Zc3hc1</b>  | 232679 | zinc finger, C3HC type 1                                                         |
| <b>Zcwpw1</b>  | 381678 | zinc finger, CW type with PWWP domain 1                                          |
| <b>Zdhhc4</b>  | 72881  | zinc finger, DHHC domain containing 4                                            |

|                |        |                                              |
|----------------|--------|----------------------------------------------|
| <b>Zfp128</b>  | 243833 | zinc finger protein 128                      |
| <b>Zfp219</b>  | 69890  | zinc finger protein 219                      |
| <b>Zfp286</b>  | 192651 | zinc finger protein 286                      |
| <b>Zfp318</b>  | 57908  | zinc finger protein 318                      |
| <b>Zfp384</b>  | 269800 | zinc finger protein 384                      |
| <b>Zfp420</b>  | 233058 | zinc finger protein 420                      |
| <b>Zfp455</b>  | 218311 | zinc finger protein 455                      |
| <b>Zfp456</b>  | 408065 | zinc finger protein 456                      |
| <b>Zfp51</b>   | 22709  | zinc finger protein 51                       |
| <b>Zfp536</b>  | 243937 | zinc finger protein 536                      |
| <b>Zfp54</b>   | 22712  | zinc finger protein 54                       |
| <b>Zfp58</b>   | 238693 | zinc finger protein 58                       |
| <b>Zfp593</b>  | 68040  | zinc finger protein 593                      |
| <b>Zfp608</b>  | 269023 | zinc finger protein 608                      |
| <b>Zfp612</b>  | 234725 | zinc finger protein 612                      |
| <b>Zfp641</b>  | 239652 | zinc finger protein 641                      |
| <b>Zfp646</b>  | 233905 | zinc finger protein 646                      |
| <b>Zfp653</b>  | 319601 | zinc finger protein 653                      |
| <b>Zfp668</b>  | 244219 | zinc finger protein 668                      |
| <b>Zfp740</b>  | 68744  | zinc finger protein 740                      |
| <b>Zfp759</b>  | 268670 | zinc finger protein 759                      |
| <b>Zfp760</b>  | 240034 | zinc finger protein 760                      |
| <b>Zfp78</b>   | 330463 | zinc finger protein 78                       |
| <b>Zfp874b</b> | 408067 | zinc finger protein 874b                     |
| <b>Zfp935</b>  | 71508  | zinc finger protein 935                      |
| <b>Zfp940</b>  | 233057 | zinc finger protein 940                      |
| <b>Zfp945</b>  | 240041 | zinc finger protein 945                      |
| <b>Zfp949</b>  | 71640  | zinc finger protein 949                      |
| <b>Zfp11</b>   | 81909  | zinc finger like protein 1                   |
| <b>Zfyve26</b> | 211978 | zinc finger, FYVE domain containing 26       |
| <b>Zic1</b>    | 22771  | zinc finger protein of the cerebellum 1      |
| <b>Zic4</b>    | 22774  | zinc finger protein of the cerebellum 4      |
| <b>Zmynd8</b>  | 228880 | zinc finger, MYND-type containing 8          |
| <b>Znhit1</b>  | 70103  | zinc finger, HIT domain containing 1         |
| <b>Zscan22</b> | 232878 | zinc finger and SCAN domain containing 22    |
| <b>Zxda</b>    | .      | .                                            |
| <b>Zxda</b>    | 668171 | zinc finger, X-linked, duplicated A          |
| <b>Zyg11a</b>  | 230590 | zyg-11 family member A, cell cycle regulator |



**Table S4:** Summary table reporting fold changes and p-values of RCF vs. CT contrasts for SAGE and all ChIP-seq experiments. Table reports only genes that could be analyzed at transcriptome and for least one histone mark.

| Gene Symbol          | FC SAGE   | FC H3K4me3 | FC H3Ac  | FC H3K27me3 | p.value SAGE | p.value H3K4me3 | p.value H3AC | p.value H3K27me3 |
|----------------------|-----------|------------|----------|-------------|--------------|-----------------|--------------|------------------|
| <b>Scaf1</b>         | 6.10E-01  | 1.79E+00   | .        | .           | 4.88E-01     | 3.39E-13        | .            | .                |
| <b>Pcp4</b>          | -5.86E-01 | .          | .        | 1.26E+00    | 2.66E-01     | .               | .            | 5.47E-05         |
| <b>Clptm1</b>        | 1.36E-01  | .          | 1.48E+00 | .           | 6.93E-01     | .               | 7.59E-08     | .                |
| <b>Ano2</b>          | -1.16E+00 | .          | .        | 1.01E+00    | 1.62E-01     | .               | .            | 1.77E-07         |
| <b>Pcyt1b</b>        | -4.72E-01 | .          | .        | 2.41E+00    | 3.32E-01     | .               | .            | 1.49E-19         |
| <b>Cpeb1</b>         | 5.80E-02  | .          | .        | -1.02E+00   | 9.67E-01     | .               | .            | 3.20E-10         |
| <b>Cbln1</b>         | -1.36E+00 | .          | .        | 2.87E+00    | 4.60E-02     | .               | .            | 1.37E-08         |
| <b>Ngdn</b>          | 9.95E-01  | .          | 1.22E+00 | .           | 1.91E-01     | .               | 1.96E-09     | .                |
| <b>Efnal</b>         | 2.82E-01  | .          | .        | -1.02E+00   | 5.50E-01     | .               | .            | 4.14E-07         |
| <b>Clec16a</b>       | 1.31E-01  | .          | 1.36E+00 | .           | 6.70E-01     | .               | 1.78E-07     | .                |
| <b>Med20</b>         | 9.22E-01  | .          | 1.62E+00 | .           | 1.33E-01     | .               | 5.61E-12     | .                |
| <b>Maf</b>           | 1.73E-01  | .          | .        | -1.19E+00   | 6.46E-01     | .               | .            | 7.07E-15         |
| <b>Clstn3</b>        | 3.03E-01  | 2.21E+00   | 1.66E+00 | .           | 4.32E-01     | 3.38E-21        | 3.07E-14     | .                |
| <b>Dhx8</b>          | 8.52E-01  | 1.07E+00   | .        | .           | 1.15E-01     | 1.84E-07        | .            | .                |
| <b>Shank3</b>        | 2.93E-01  | .          | .        | -1.88E+00   | 5.28E-01     | .               | .            | 1.04E-06         |
| <b>Mospd3</b>        | 7.52E-01  | .          | 1.32E+00 | .           | 3.20E-01     | .               | 1.88E-07     | .                |
| <b>B4galnt1</b>      | 5.19E-01  | .          | .        | -1.43E+00   | 3.39E-01     | .               | .            | 5.98E-10         |
| <b>Slc25a45</b>      | 4.09E-01  | .          | 1.75E+00 | .           | 5.69E-01     | .               | 5.47E-10     | .                |
| <b>Arsg</b>          | 3.43E-01  | .          | .        | -1.29E+00   | 4.47E-01     | .               | .            | 6.61E-03         |
| <b>Ptp4a3</b>        | 4.01E-01  | .          | 1.01E+00 | .           | 5.24E-01     | .               | 2.42E-04     | .                |
| <b>Sox21</b>         | -3.95E-01 | .          | .        | 3.02E+00    | 3.88E-01     | .               | .            | 1.84E-15         |
| <b>1700011A15Rik</b> | -5.50E-02 | .          | .        | 3.01E+00    | 9.31E-01     | .               | .            | 3.11E-08         |
| <b>Zfp384</b>        | 8.15E-01  | .          | 1.04E+00 | .           | 1.58E-01     | .               | 8.15E-07     | .                |
| <b>Zfp935</b>        | 7.35E-01  | .          | 3.13E+00 | .           | 3.39E-01     | .               | 4.92E-05     | .                |
| <b>Fzd7</b>          | 6.40E-02  | .          | .        | -1.02E+00   | 8.80E-01     | .               | .            | 2.45E-16         |
| <b>Gpsm1</b>         | 4.00E-02  | .          | 1.24E+00 | .           | 9.53E-01     | .               | 1.72E-06     | .                |
| <b>Ucp2</b>          | -3.09E-01 | .          | .        | 2.47E+00    | 6.22E-01     | .               | .            | 2.58E-03         |
| <b>Rad51b</b>        | 3.03E+00  | .          | 1.56E+00 | .           | 4.14E-03     | .               | 2.46E-03     | .                |
| <b>Msrb1</b>         | 3.32E-01  | .          | 1.72E+00 | .           | 6.15E-01     | .               | 4.97E-06     | .                |
| <b>Smg9</b>          | 1.04E+00  | .          | 1.97E+00 | .           | 8.45E-02     | .               | 7.53E-04     | .                |
| <b>Nt5e</b>          | 7.40E-02  | .          | .        | -1.01E+00   | 9.45E-01     | .               | .            | 2.93E-04         |
| <b>Dnajc6</b>        | 4.30E-02  | .          | .        | -1.12E+00   | 9.23E-01     | .               | .            | 1.47E-03         |
| <b>Dctn2</b>         | 1.24E-01  | .          | .        | -1.39E+00   | 7.00E-01     | .               | .            | 2.79E-06         |
| <b>Ccdc174</b>       | -4.80E-02 | .          | .        | 1.15E+00    | 8.83E-01     | .               | .            | 3.90E-07         |

|                      |           |          |               |           |          |          |          |          |
|----------------------|-----------|----------|---------------|-----------|----------|----------|----------|----------|
| <b>Cd164</b>         | 1.03E+00  | 1.36E+00 | .             | .         | 8.30E-02 | 1.56E-12 | .        | .        |
| <b>2410124H12Rik</b> | -2.10E-02 | .        | .             | 1.43E+00  | 9.82E-01 | .        | .        | 8.16E-10 |
| <b>Ech1</b>          | 1.76E-01  | .        | 1.11E+00      | .         | 7.32E-01 | .        | 4.04E-08 | .        |
| <b>Lmtk2</b>         | -3.80E-02 | .        | .             | 2.29E+00  | 9.05E-01 | .        | .        | 4.08E-10 |
| <b>Pafah2</b>        | 1.40E-01  | .        | 1.12E+00      | .         | 7.75E-01 | .        | 7.25E-06 | .        |
| <b>Vrk1</b>          | -2.09E-01 | .        | .             | 1.23E+00  | 7.32E-01 | .        | .        | 4.79E-09 |
| <b>Lrig2</b>         | 5.30E-01  | .        | 1.76E+00      | .         | 4.36E-01 | .        | 4.06E-08 | .        |
| <b>P2rx7</b>         | 8.43E-01  | .        | 1.34E+00      | .         | 5.53E-01 | .        | 1.84E-03 | .        |
| <b>E130006D01Rik</b> | 2.18E+00  | .        | 1.92E+00      | 1.02E+00  | 2.52E-02 | .        | 3.05E-07 | 4.71E-12 |
| <b>Frmf6</b>         | 5.24E-01  | 1.01E+00 | .             | .         | 2.05E-01 | 8.09E-06 | .        | .        |
| <b>Cecr2</b>         | 9.09E-01  | .        | .             | -1.56E+00 | 1.24E-01 | .        | .        | 3.56E-04 |
| <b>Mdm1</b>          | -1.31E+00 | .        | .             | 7.33E+00  | 6.59E-02 | .        | .        | 3.64E-12 |
| <b>Tceal5</b>        | -3.77E-01 | .        | .             | 3.57E+00  | 2.23E-01 | .        | .        | 2.60E-13 |
| <b>Ergic2</b>        | 6.90E-02  | .        | 2.15E+00      | .         | 8.33E-01 | .        | 6.93E-07 | .        |
| <b>Pde3a</b>         | 1.34E+00  | .        | .             | -1.10E+00 | 1.16E-01 | .        | .        | 8.50E-10 |
| <b>Map3k1</b>        | 9.70E-01  | .        | .             | -1.46E+00 | 1.62E-01 | .        | .        | 2.46E-03 |
| <b>Snora17</b>       | 1.54E+00  | 1.21E+00 | .             | .         | 1.12E-01 | 2.60E-09 | .        | .        |
| <b>Elavl4</b>        | 2.94E-01  | .        | .             | -1.05E+00 | 3.94E-01 | .        | .        | 3.26E-04 |
| <b>Slc7a1</b>        | 1.99E-01  | .        | .             | -1.32E+00 | 6.33E-01 | .        | .        | 1.84E-03 |
| <b>Msrb3</b>         | -1.60E-02 | .        | .             | 3.42E+00  | 9.72E-01 | .        | .        | 1.42E-13 |
| <b>Pacsin3</b>       | 2.28E-01  | .        | .             | -1.06E+00 | 6.75E-01 | .        | .        | 6.45E-06 |
| <b>Cenpu</b>         | 1.52E+00  | 2.52E+00 | .             | .         | 1.18E-01 | 3.14E-19 | .        | .        |
| <b>Pdia4</b>         | 3.19E-01  | .        | 1.40E+00      | .         | 6.11E-01 | .        | 6.43E-03 | .        |
| <b>Nlrp6</b>         | -2.52E-01 | .        | .             | 1.31E+00  | 7.01E-01 | .        | .        | 4.89E-07 |
| <b>Arhgap26</b>      | 7.00E-02  | 1.26E+00 | 1.03E+00      | .         | 8.65E-01 | 4.23E-07 | 1.85E-03 | .        |
| <b>Zfp760</b>        | 7.00E-02  | 2.27E+00 | 1.46E+00      | .         | 8.61E-01 | 1.39E-20 | 1.61E-11 | .        |
| <b>Eif4e3</b>        | 2.16E-01  | .        | .             | -1.15E+00 | 6.87E-01 | .        | .        | 2.63E-03 |
| <b>Gm7538</b>        | -5.32E-01 | .        | .             | 1.04E+00  | 4.58E-01 | .        | .        | 2.75E-06 |
| <b>Gmfg</b>          | 2.55E-01  | 2.44E+00 | .             | .         | 6.69E-01 | 6.35E-22 | .        | .        |
| <b>Pls1</b>          | 3.90E-02  | .        | .             | -1.48E+00 | 9.26E-01 | .        | .        | 2.64E-04 |
| <b>Zfp455</b>        | 1.22E+00  | .        | 4.41E+00      | .         | 2.73E-01 | .        | 1.52E-11 | .        |
| <b>Mmd</b>           | 3.34E-01  | .        | .             | -1.05E+00 | 4.24E-01 | .        | .        | 7.15E-03 |
| <b>Ezh1</b>          | -3.71E-01 | .        | .             | 1.74E+00  | 7.24E-01 | .        | .        | 1.34E-08 |
| <b>Emb</b>           | 3.86E-01  | .        | .             | -1.13E+00 | 4.50E-01 | .        | .        | 8.90E-09 |
| <b>Negr1</b>         | 1.79E-01  | .        | .             | -1.15E+00 | 5.90E-01 | .        | .        | 1.02E-04 |
| <b>Tbkbp1</b>        | 5.39E-01  | .        | 2.37E+00      | -1.36E+00 | 2.38E-01 | .        | 5.54E-06 | 6.47E-05 |
| <b>Brip1</b>         | 1.51E-01  | .        | 1.69E+00      | .         | 7.03E-01 | .        | 2.93E-05 | .        |
| <b>Zfp420</b>        | 4.45E-01  | 1.00E+00 | .             | .         | 4.70E-01 | 5.70E-06 | .        | .        |
| <b>Aco2</b>          | 1.76E-01  | .        | 1.00E+00      | .         | 6.24E-01 | .        | 8.56E-07 | .        |
| <b>Litaf</b>         | -2.56E-01 | .        | -<br>1.65E+00 | .         | 5.48E-01 | .        | 6.10E-10 | .        |
| <b>Stpg1</b>         | 2.54E-01  | .        | 1.38E+00      | .         | 7.15E-01 | .        | 7.22E-07 | .        |

|                           |           |          |               |           |          |          |          |          |
|---------------------------|-----------|----------|---------------|-----------|----------|----------|----------|----------|
| <b>Xbp1</b>               | 2.20E-01  | 1.03E+00 | .             | .         | 5.89E-01 | 1.33E-04 | .        | .        |
| <b>Atg4a</b>              | -1.13E-01 | .        | .             | 1.11E+00  | 7.78E-01 | .        | .        | 1.77E-06 |
| <b>A330070<br/>K13Rik</b> | 2.70E-02  | .        | 1.18E+00      | .         | 9.55E-01 | .        | 2.19E-03 | .        |
| <b>Psm10</b>              | -5.55E-01 | .        | .             | 1.11E+00  | 2.69E-01 | .        | .        | 1.77E-06 |
| <b>Cdv3</b>               | 4.69E-01  | .        | .             | -1.49E+00 | 2.54E-01 | .        | .        | 7.71E-08 |
| <b>Rnps1</b>              | 7.86E-01  | .        | 1.17E+00      | .         | 1.09E-01 | .        | 1.05E-03 | .        |
| <b>Spns2</b>              | 5.00E-01  | .        | 1.90E+00      | .         | 5.36E-01 | .        | 1.29E-06 | .        |
| <b>Pycr1</b>              | 6.85E-01  | .        | .             | -1.12E+00 | 3.77E-01 | .        | .        | 1.75E-07 |
| <b>Zic4</b>               | -1.21E+00 | .        | .             | 1.93E+00  | 1.06E-01 | .        | .        | 1.25E-18 |
| <b>Gabrd</b>              | -1.02E+00 | .        | -<br>1.26E+00 | .         | 1.62E-01 | .        | 1.41E-05 | .        |
| <b>Pptc7</b>              | 2.10E-02  | .        | 1.85E+00      | .         | 9.59E-01 | .        | 4.36E-09 | .        |
| <b>Abhd4</b>              | 1.38E+00  | 1.23E+00 | .             | .         | 1.06E-01 | 1.68E-12 | .        | .        |
| <b>Mxd4</b>               | 3.21E-01  | .        | 1.10E+00      | .         | 4.49E-01 | .        | 1.61E-03 | .        |
| <b>Daam2</b>              | 1.68E-01  | .        | 1.47E+00      | .         | 6.52E-01 | .        | 1.81E-08 | .        |
| <b>Cldn15</b>             | 3.78E-01  | .        | 2.65E+00      | .         | 7.11E-01 | .        | 5.67E-12 | .        |
| <b>Slc48a1</b>            | 1.88E-01  | .        | 1.38E+00      | .         | 6.49E-01 | .        | 1.12E-05 | .        |
| <b>Slc2a9</b>             | 1.62E-01  | 1.57E+00 | .             | .         | 8.61E-01 | 2.91E-09 | .        | .        |
| <b>8430408G<br/>22Rik</b> | 6.85E-01  | .        | .             | -1.23E+00 | 3.77E-01 | .        | .        | 5.07E-06 |
| <b>Drg2</b>               | 5.47E-01  | 1.11E+00 | .             | .         | 2.41E-01 | 4.17E-11 | .        | .        |
| <b>D430020J<br/>02Rik</b> | 6.56E-01  | .        | 1.05E+00      | .         | 4.30E-01 | .        | 2.04E-04 | .        |
| <b>Rbm15</b>              | 1.80E+00  | .        | .             | -1.82E+00 | 6.56E-02 | .        | .        | 3.88E-04 |
| <b>Akr1b10</b>            | 4.86E-01  | 1.68E+00 | .             | .         | 3.59E-01 | 9.34E-12 | .        | .        |
| <b>Pgbd5</b>              | 1.89E-01  | .        | .             | -1.39E+00 | 5.96E-01 | .        | .        | 4.97E-04 |
| <b>Scnn1b</b>             | -1.07E+00 | .        | .             | 2.34E+00  | 3.30E-01 | .        | .        | 3.39E-08 |
| <b>Usp19</b>              | 3.52E-01  | .        | .             | -1.07E+00 | 4.70E-01 | .        | .        | 8.44E-10 |
| <b>Bmpr1b</b>             | -1.44E+00 | .        | .             | 1.26E+00  | 4.95E-02 | .        | .        | 6.48E-05 |
| <b>Cox6b1</b>             | 7.22E-01  | .        | 1.07E+00      | .         | 3.88E-01 | .        | 1.54E-05 | .        |
| <b>Cldn2</b>              | -6.00E-02 | .        | .             | 3.14E+00  | 9.21E-01 | .        | .        | 1.64E-12 |
| <b>Tspan11</b>            | -2.63E-01 | .        | .             | 1.00E+00  | 7.23E-01 | .        | .        | 3.11E-16 |
| <b>Lin28a</b>             | -5.58E-01 | .        | .             | 1.52E+00  | 5.05E-01 | .        | .        | 2.53E-06 |
| <b>943003810<br/>1Rik</b> | 1.02E+00  | 1.22E+00 | .             | .         | 1.03E-01 | 8.29E-06 | .        | .        |
| <b>Mgat3</b>              | 1.81E-01  | .        | 1.87E+00      | .         | 7.22E-01 | .        | 2.08E-08 | .        |
| <b>Faim2</b>              | 7.73E-01  | .        | .             | -1.29E+00 | 7.92E-02 | .        | .        | 4.41E-04 |
| <b>Nr5a2</b>              | -5.32E-01 | .        | .             | 3.69E+00  | 4.58E-01 | .        | .        | 1.63E-06 |
| <b>Gpr3</b>               | 1.19E+00  | .        | .             | -1.06E+00 | 5.40E-01 | .        | .        | 5.28E-07 |
| <b>Frdm8</b>              | 1.35E+00  | .        | 1.75E+00      | .         | 2.63E-01 | .        | 5.47E-10 | .        |
| <b>Dyrk3</b>              | 8.87E-01  | .        | .             | -1.28E+00 | 1.35E-01 | .        | .        | 4.60E-03 |
| <b>Auts2</b>              | 5.21E-01  | .        | .             | -1.14E+00 | 5.89E-01 | .        | .        | 3.06E-04 |
| <b>Ccdc60</b>             | -6.42E-01 | .        | .             | 1.10E+00  | 5.04E-01 | .        | .        | 3.23E-13 |
| <b>Fis1</b>               | 5.75E-01  | .        | 2.65E+00      | .         | 3.46E-01 | .        | 5.67E-12 | .        |

|                 |           |          |          |           |          |          |          |          |
|-----------------|-----------|----------|----------|-----------|----------|----------|----------|----------|
| <b>Mpv17</b>    | 4.76E-01  | 1.02E+00 | .        | .         | 3.01E-01 | 1.43E-06 | .        | .        |
| <b>Lrrn1</b>    | 4.00E-01  | .        | .        | -1.75E+00 | 5.05E-01 | .        | .        | 4.18E-09 |
| <b>Taf8</b>     | 3.70E-01  | 1.50E+00 | .        | .         | 6.85E-01 | 1.23E-21 | .        | .        |
| <b>Traip</b>    | 1.12E+00  | .        | .        | -1.20E+00 | 2.11E-01 | .        | .        | 2.75E-08 |
| <b>P2ry2</b>    | -1.59E-01 | .        | .        | 2.16E+00  | 8.09E-01 | .        | .        | 8.60E-09 |
| <b>Maged1</b>   | -2.06E-01 | .        | .        | 3.40E+00  | 5.60E-01 | .        | .        | 1.62E-14 |
| <b>Ubp2l</b>    | 7.57E-01  | .        | 1.54E+00 | .         | 3.70E-01 | .        | 3.73E-08 | .        |
| <b>Tmsb4x</b>   | -6.10E-02 | .        | .        | 1.38E+00  | 8.98E-01 | .        | .        | 6.73E-06 |
| <b>Cnn3</b>     | 5.56E-01  | .        | .        | -2.25E+00 | 2.36E-01 | .        | .        | 9.26E-05 |
| <b>Tsc22d4</b>  | 2.40E+00  | .        | .        | -1.28E+00 | 7.80E-04 | .        | .        | 9.28E-05 |
| <b>Kcnd3os</b>  | 1.40E+00  | .        | .        | -1.24E+00 | 8.76E-02 | .        | .        | 2.92E-04 |
| <b>Iqsec1</b>   | 3.13E-01  | .        | 1.93E+00 | .         | 3.71E-01 | .        | 1.42E-04 | .        |
| <b>Slc26a11</b> | 2.80E-01  | .        | .        | -1.76E+00 | 4.47E-01 | .        | .        | 2.19E-06 |
| <b>Mapkapk3</b> | 8.41E-01  | .        | .        | -1.99E+00 | 3.01E-01 | .        | .        | 3.30E-09 |
| <b>Fbln5</b>    | -6.49E-01 | .        | .        | 5.80E+00  | 4.27E-01 | .        | .        | 5.44E-20 |
| <b>Irgm1</b>    | 2.25E-01  | .        | 1.92E+00 | .         | 5.70E-01 | .        | 5.50E-09 | .        |
| <b>Aqp2</b>     | 1.12E+00  | .        | .        | -1.21E+00 | 2.67E-01 | .        | .        | 1.01E-04 |
| <b>Gm17296</b>  | 9.05E-01  | .        | .        | -1.18E+00 | 2.63E-01 | .        | .        | 5.35E-07 |
| <b>Junb</b>     | 2.33E-01  | .        | .        | -2.12E+00 | 8.80E-01 | .        | .        | 4.59E-17 |
| <b>B3glct</b>   | 2.15E-01  | .        | .        | -1.51E+00 | 6.34E-01 | .        | .        | 3.86E-04 |
| <b>Plk2</b>     | 1.37E-01  | .        | .        | -1.57E+00 | 8.05E-01 | .        | .        | 2.93E-04 |
| <b>Ifitm10</b>  | 1.24E+00  | .        | .        | -1.22E+00 | 1.31E-01 | .        | .        | 2.00E-09 |
| <b>Mtmr4</b>    | 1.08E+00  | .        | 1.66E+00 | .         | 1.90E-01 | .        | 9.94E-10 | .        |
| <b>Wdr55</b>    | 1.29E-01  | 1.73E+00 | .        | .         | 7.92E-01 | 2.13E-20 | .        | .        |
| <b>Ntm</b>      | 4.43E-01  | 1.53E+00 | .        | .         | 2.67E-01 | 6.11E-15 | .        | .        |
| <b>Chml</b>     | 4.34E-01  | .        | .        | -1.52E+00 | 2.95E-01 | .        | .        | 9.04E-03 |
| <b>Pparg</b>    | 1.27E+00  | .        | .        | -1.03E+00 | 3.81E-01 | .        | .        | 6.03E-10 |
| <b>Epb4.1</b>   | 1.50E-01  | .        | .        | -2.23E+00 | 8.78E-01 | .        | .        | 1.92E-04 |
| <b>Rfxank</b>   | 9.00E-02  | 2.58E+00 | 1.31E+00 | .         | 9.36E-01 | 3.44E-25 | 3.62E-10 | .        |
| <b>Gnai3</b>    | 2.53E-01  | .        | .        | -1.21E+00 | 6.55E-01 | .        | .        | 1.31E-05 |
| <b>Fam19a5</b>  | 1.52E-01  | .        | .        | -1.20E+00 | 7.97E-01 | .        | .        | 6.43E-04 |
| <b>Rsrp1</b>    | 3.46E-01  | .        | 1.00E+00 | .         | 4.63E-01 | .        | 1.39E-03 | .        |
| <b>Pars2</b>    | 1.66E-01  | 1.03E+00 | .        | 2.60E+00  | 7.65E-01 | 5.94E-08 | .        | 1.94E-21 |
| <b>Nuak2</b>    | 8.61E-01  | .        | .        | -2.59E+00 | 4.02E-01 | .        | .        | 3.40E-05 |
| <b>Setd6</b>    | 2.10E+00  | .        | .        | -1.00E+00 | 1.08E-01 | .        | .        | 5.77E-07 |
| <b>AU040320</b> | 1.80E-02  | .        | 1.05E+00 | .         | 9.80E-01 | .        | 3.91E-06 | .        |
| <b>Brd8</b>     | 1.80E-02  | 1.26E+00 | .        | .         | 9.63E-01 | 2.59E-08 | .        | .        |
| <b>Banp</b>     | 1.30E+00  | .        | 1.08E+00 | .         | 6.70E-02 | .        | 4.50E-05 | .        |
| <b>Srcin1</b>   | 1.94E-01  | .        | .        | -1.13E+00 | 6.22E-01 | .        | .        | 2.56E-04 |
| <b>Elavl2</b>   | -6.80E-02 | .        | .        | 1.33E+00  | 8.34E-01 | .        | .        | 1.01E-07 |
| <b>Cap1</b>     | 1.68E-01  | .        | 2.66E+00 | .         | 6.85E-01 | .        | 5.67E-11 | .        |
| <b>Fjx1</b>     | 1.35E-01  | .        | .        | -1.19E+00 | 9.44E-01 | .        | .        | 4.16E-06 |

|                      |           |          |               |           |          |          |          |          |
|----------------------|-----------|----------|---------------|-----------|----------|----------|----------|----------|
| <b>Amn</b>           | 2.75E-01  | .        | .             | -1.14E+00 | 6.48E-01 | .        | .        | 2.94E-10 |
| <b>Rps6ka2</b>       | 4.85E-01  | 1.53E+00 | .             | .         | 3.93E-01 | 3.14E-14 | .        | .        |
| <b>Ccdc93</b>        | 9.40E-01  | .        | .             | -1.06E+00 | 1.14E-01 | .        | .        | 2.19E-03 |
| <b>Bach1</b>         | 1.60E-02  | .        | 1.60E+00      | .         | 9.67E-01 | .        | 3.80E-06 | .        |
| <b>Zfp456</b>        | 2.76E-01  | .        | 1.49E+00      | .         | 6.79E-01 | .        | 2.87E-04 | .        |
| <b>Hook1</b>         | 2.58E-01  | .        | .             | -1.25E+00 | 7.00E-01 | .        | .        | 2.09E-06 |
| <b>Scd1</b>          | 3.23E-01  | .        | 1.54E+00      | .         | 3.46E-01 | .        | 8.44E-07 | .        |
| <b>Btbd19</b>        | 1.04E+00  | .        | 1.40E+00      | .         | 3.71E-01 | .        | 1.02E-07 | .        |
| <b>Car5a</b>         | 3.80E-02  | .        | 1.08E+00      | .         | 9.65E-01 | .        | 4.50E-05 | .        |
| <b>Samd4b</b>        | 3.84E-01  | 2.44E+00 | .             | .         | 5.47E-01 | 6.35E-22 | .        | .        |
| <b>Rtn4r</b>         | -2.05E-01 | .        | -<br>1.22E+00 | .         | 5.84E-01 | .        | 2.24E-04 | .        |
| <b>Ier2</b>          | 1.90E-01  | 2.57E+00 | 1.04E+00      | -1.05E+00 | 6.44E-01 | 1.82E-26 | 3.69E-08 | 8.51E-10 |
| <b>Itpripl2</b>      | -1.25E-01 | .        | .             | 2.65E+00  | 8.05E-01 | .        | .        | 1.71E-09 |
| <b>Magi3</b>         | 1.50E-01  | .        | .             | -1.38E+00 | 7.31E-01 | .        | .        | 1.26E-04 |
| <b>Mfsd5</b>         | 4.35E-01  | .        | 1.48E+00      | .         | 2.69E-01 | .        | 4.32E-06 | .        |
| <b>Mc3r</b>          | -8.40E-01 | .        | .             | 1.16E+00  | 4.27E-01 | .        | .        | 6.46E-05 |
| <b>Rnf40</b>         | 2.10E-01  | .        | 1.12E+00      | .         | 6.90E-01 | .        | 1.16E-04 | .        |
| <b>Gjb5</b>          | 9.95E-01  | .        | .             | -1.19E+00 | 1.91E-01 | .        | .        | 1.09E-03 |
| <b>Awat2</b>         | -1.69E+00 | .        | .             | 2.99E+00  | 6.16E-02 | .        | .        | 1.08E-15 |
| <b>Disp2</b>         | 4.60E-01  | 1.12E+00 | .             | .         | 3.08E-01 | 4.42E-05 | .        | .        |
| <b>Tmem258</b>       | 9.95E-01  | 1.89E+00 | 1.01E+00      | .         | 1.91E-01 | 1.89E-14 | 2.91E-04 | .        |
| <b>Iqsec2</b>        | -1.29E+00 | .        | .             | 1.12E+00  | 8.25E-02 | .        | .        | 1.80E-07 |
| <b>Smad5</b>         | 8.73E-01  | .        | 1.22E+00      | .         | 5.33E-02 | .        | 3.13E-04 | .        |
| <b>Kif20a</b>        | 6.34E-01  | 1.26E+00 | .             | .         | 4.22E-01 | 2.59E-08 | .        | .        |
| <b>Sppl3</b>         | 3.90E-02  | .        | .             | -1.04E+00 | 9.05E-01 | .        | .        | 5.92E-03 |
| <b>Smg5</b>          | 1.44E-01  | .        | .             | -1.51E+00 | 7.95E-01 | .        | .        | 1.27E-05 |
| <b>Ppp4r1l-ps</b>    | 4.58E-01  | 1.03E+00 | .             | .         | 3.79E-01 | 1.98E-05 | .        | .        |
| <b>Tmem177</b>       | 1.71E-01  | .        | .             | -1.53E+00 | 6.92E-01 | .        | .        | 3.89E-05 |
| <b>Zfp759</b>        | 4.59E-01  | .        | 2.52E+00      | .         | 6.01E-01 | .        | 8.97E-06 | .        |
| <b>Nfib</b>          | 5.31E-01  | .        | 1.18E+00      | .         | 2.53E-01 | .        | 7.79E-03 | .        |
| <b>Fam171a1</b>      | -4.62E-01 | .        | -<br>1.04E+00 | .         | 4.23E-01 | .        | 4.07E-03 | .        |
| <b>S100a16</b>       | 6.20E-02  | .        | 1.62E+00      | .         | 9.06E-01 | .        | 4.34E-07 | .        |
| <b>Vwa1</b>          | 7.80E-01  | .        | .             | -2.96E+00 | 1.88E-01 | .        | .        | 4.03E-04 |
| <b>Gpc6</b>          | 1.47E-01  | .        | .             | -1.08E+00 | 8.25E-01 | .        | .        | 6.42E-09 |
| <b>Rbm27</b>         | 1.40E-02  | .        | 1.35E+00      | .         | 9.67E-01 | .        | 3.81E-05 | .        |
| <b>Slc11a2</b>       | 5.72E-01  | 1.23E+00 | .             | .         | 6.96E-01 | 1.20E-16 | .        | .        |
| <b>1700025G04Rik</b> | 2.13E-01  | .        | .             | -1.33E+00 | 5.68E-01 | .        | .        | 7.92E-03 |
| <b>Clec4a1</b>       | 4.62E-01  | .        | .             | -1.12E+00 | 7.46E-01 | .        | .        | 1.25E-04 |
| <b>Zfp653</b>        | 3.64E-01  | .        | 1.42E+00      | .         | 2.74E-01 | .        | 9.67E-07 | .        |
| <b>Oasl1</b>         | 1.61E+00  | .        | .             | -1.64E+00 | 2.51E-01 | .        | .        | 5.78E-05 |
| <b>Igfals</b>        | 7.16E-01  | .        | 1.19E+00      | .         | 4.66E-01 | .        | 1.07E-03 | .        |

|                      |           |          |               |           |          |          |          |          |
|----------------------|-----------|----------|---------------|-----------|----------|----------|----------|----------|
| <b>Zfp51</b>         | 6.40E-01  | 1.11E+00 | .             | .         | 2.90E-01 | 1.05E-12 | .        | .        |
| <b>Eif4b</b>         | -1.74E-01 | .        | .             | 3.59E+00  | 7.55E-01 | .        | .        | 1.97E-11 |
| <b>Rasgrp3</b>       | 7.40E-02  | .        | 2.07E+00      | .         | 8.83E-01 | .        | 1.24E-08 | .        |
| <b>Cdh4</b>          | -1.20E-01 | .        | .             | 1.38E+00  | 7.88E-01 | .        | .        | 8.57E-10 |
| <b>Ap5z1</b>         | 3.20E-01  | .        | 1.35E+00      | .         | 5.94E-01 | .        | 5.52E-03 | .        |
| <b>Lpin3</b>         | 4.15E-01  | .        | .             | -1.01E+00 | 5.78E-01 | .        | .        | 3.51E-04 |
| <b>Arhgdia</b>       | 6.86E-01  | 1.13E+00 | .             | .         | 3.93E-01 | 3.02E-17 | .        | .        |
| <b>Samd14</b>        | 1.32E+00  | .        | .             | -1.58E+00 | 6.06E-02 | .        | .        | 3.77E-07 |
| <b>Gsg1l</b>         | -3.43E-01 | .        | -<br>1.02E+00 | .         | 6.84E-01 | .        | 6.42E-04 | .        |
| <b>Tmem100</b>       | -2.10E-01 | .        | .             | 2.79E+00  | 7.45E-01 | .        | .        | 5.82E-13 |
| <b>Gtf2a2</b>        | -1.70E-02 | .        | -<br>1.06E+00 | .         | 9.84E-01 | .        | 4.91E-03 | .        |
| <b>Ephb2</b>         | 8.00E-02  | .        | .             | -1.06E+00 | 9.19E-01 | .        | .        | 2.05E-07 |
| <b>Arl5c</b>         | 1.44E+00  | .        | .             | -1.01E+00 | 1.00E-01 | .        | .        | 2.38E-07 |
| <b>Gpr143</b>        | -1.07E+00 | .        | .             | 2.62E+00  | 2.34E-01 | .        | .        | 6.17E-06 |
| <b>Tmem88b</b>       | 2.57E-01  | .        | 1.39E+00      | .         | 4.57E-01 | .        | 1.05E-08 | .        |
| <b>Serinc2</b>       | -1.82E+00 | .        | .             | 2.68E+00  | 2.05E-01 | .        | .        | 4.44E-07 |
| <b>Rbp1</b>          | -4.88E-01 | .        | .             | 3.09E+00  | 2.81E-01 | .        | .        | 6.98E-16 |
| <b>Calcb</b>         | -1.68E-01 | .        | .             | 1.14E+00  | 7.73E-01 | .        | .        | 6.27E-16 |
| <b>Edf1</b>          | 5.47E-01  | 1.28E+00 | .             | .         | 3.51E-01 | 4.40E-11 | .        | .        |
| <b>Gcnt4</b>         | -3.60E-02 | .        | .             | 3.46E+00  | 9.26E-01 | .        | .        | 3.18E-12 |
| <b>Clec1b</b>        | 1.45E+00  | .        | .             | -1.92E+00 | 2.02E-01 | .        | .        | 2.10E-03 |
| <b>Klhl42</b>        | 4.10E-01  | .        | .             | -1.39E+00 | 3.87E-01 | .        | .        | 5.60E-06 |
| <b>Zscan22</b>       | 6.50E-02  | 1.20E+00 | .             | .         | 8.65E-01 | 3.82E-07 | .        | .        |
| <b>Fabp3</b>         | 1.08E-01  | .        | .             | -1.06E+00 | 9.39E-01 | .        | .        | 2.34E-10 |
| <b>Dmtn</b>          | 3.78E-01  | .        | 1.21E+00      | .         | 2.89E-01 | .        | 9.57E-08 | .        |
| <b>Mroh1</b>         | 8.96E-01  | .        | 1.31E+00      | .         | 2.66E-01 | .        | 6.43E-04 | .        |
| <b>Tmem116</b>       | -7.33E-01 | .        | .             | 2.91E+00  | 3.94E-01 | .        | .        | 5.69E-10 |
| <b>Dnali1</b>        | 7.20E-02  | .        | 1.31E+00      | .         | 8.78E-01 | .        | 2.22E-04 | .        |
| <b>Gm4013</b>        | 9.14E-01  | .        | 1.35E+00      | .         | 2.35E-01 | .        | 3.81E-05 | .        |
| <b>Marveld3</b>      | -5.93E-01 | .        | .             | 1.02E+00  | 2.83E-01 | .        | .        | 8.75E-04 |
| <b>BC039966</b>      | -8.21E-01 | .        | .             | 2.16E+00  | 4.13E-01 | .        | .        | 6.71E-37 |
| <b>Tmem259</b>       | 9.95E-01  | .        | 1.64E+00      | .         | 1.91E-01 | .        | 1.13E-05 | .        |
| <b>Strip2</b>        | 7.56E-01  | .        | 1.70E+00      | .         | 3.96E-01 | .        | 7.18E-04 | .        |
| <b>Sreklip1</b>      | 5.80E-02  | 1.75E+00 | 1.10E+00      | .         | 8.88E-01 | 2.33E-23 | 5.58E-03 | .        |
| <b>Agbl2</b>         | 1.99E-01  | .        | .             | -1.10E+00 | 8.60E-01 | .        | .        | 5.89E-04 |
| <b>Aanat</b>         | -1.40E+00 | .        | .             | 1.61E+00  | 1.26E-01 | .        | .        | 2.38E-06 |
| <b>Tsr1</b>          | 1.50E-02  | .        | 1.21E+00      | .         | 9.76E-01 | .        | 1.55E-03 | .        |
| <b>Ppfia4</b>        | 1.75E-01  | .        | .             | -1.21E+00 | 7.09E-01 | .        | .        | 4.31E-05 |
| <b>Chn1</b>          | 6.19E-01  | .        | 3.19E+00      | .         | 2.34E-01 | .        | 7.85E-07 | .        |
| <b>Cdk8</b>          | 1.63E-01  | .        | .             | -1.42E+00 | 7.52E-01 | .        | .        | 3.37E-04 |
| <b>4921504E06Rik</b> | -5.32E-01 | .        | -<br>1.13E+00 | .         | 4.58E-01 | .        | 2.63E-03 | .        |

|                           |           |           |               |           |          |          |          |          |
|---------------------------|-----------|-----------|---------------|-----------|----------|----------|----------|----------|
| <b>Prickle2</b>           | 1.41E-01  | .         | 2.60E+00      | .         | 6.95E-01 | .        | 1.44E-10 | .        |
| <b>Cmas</b>               | -1.13E+00 | .         | .             | 2.16E+00  | 6.19E-01 | .        | .        | 5.54E-06 |
| <b>Malat1</b>             | 4.58E-01  | 1.97E+00  | .             | .         | 1.87E-01 | 1.95E-24 | .        | .        |
| <b>Ldoc1l</b>             | 1.48E-01  | .         | .             | -1.38E+00 | 8.70E-01 | .        | .        | 7.45E-07 |
| <b>Gpr133</b>             | -3.47E-01 | .         | .             | 1.41E+00  | 5.09E-01 | .        | .        | 4.68E-22 |
| <b>Rheb</b>               | -1.97E-01 | .         | -<br>1.12E+00 | .         | 6.42E-01 | .        | 7.79E-03 | .        |
| <b>Tmem138</b>            | 1.51E-01  | 1.16E+00  | .             | .         | 8.78E-01 | 2.48E-10 | .        | .        |
| <b>Cenpl</b>              | 1.99E+00  | 1.30E+00  | .             | .         | 7.94E-02 | 8.93E-12 | .        | .        |
| <b>Sec61a1</b>            | 4.08E-01  | .         | .             | -1.11E+00 | 5.18E-01 | .        | .        | 8.73E-05 |
| <b>A630075F<br/>10Rik</b> | -2.37E-01 | .         | .             | 2.66E+00  | 7.90E-01 | .        | .        | 1.70E-11 |
| <b>Prkce</b>              | 1.05E+00  | .         | .             | -1.85E+00 | 5.89E-02 | .        | .        | 4.14E-11 |
| <b>Tbx3os2</b>            | -1.07E+00 | .         | .             | 1.41E+00  | 2.46E-01 | .        | .        | 3.30E-07 |
| <b>Sema3f</b>             | 1.51E+00  | .         | .             | -1.01E+00 | 2.31E-01 | .        | .        | 4.98E-03 |
| <b>Taldo1</b>             | 1.62E-01  | .         | 1.24E+00      | .         | 6.15E-01 | .        | 4.68E-07 | .        |
| <b>Mcm2</b>               | 3.89E-01  | .         | 1.88E+00      | .         | 3.62E-01 | .        | 2.70E-09 | .        |
| <b>Iffo2</b>              | -8.76E-01 | .         | .             | 1.21E+00  | 2.52E-01 | .        | .        | 4.65E-06 |
| <b>Cstf1</b>              | 7.31E-01  | .         | .             | -1.15E+00 | 3.60E-01 | .        | .        | 2.12E-03 |
| <b>Tppp3</b>              | 3.70E-01  | .         | .             | -1.58E+00 | 6.55E-01 | .        | .        | 1.35E-04 |
| <b>Zfp949</b>             | 9.45E-01  | 3.93E+00  | 2.18E+00      | .         | 3.51E-01 | 9.91E-31 | 3.60E-18 | .        |
| <b>Slc4a1</b>             | 1.79E+00  | .         | .             | -1.09E+00 | 2.15E-01 | .        | .        | 3.00E-06 |
| <b>Cbfa2t3</b>            | 7.32E-01  | .         | .             | -1.03E+00 | 3.07E-01 | .        | .        | 8.43E-09 |
| <b>Scgb1c1</b>            | -4.23E-01 | .         | .             | 1.01E+00  | 7.01E-01 | .        | .        | 1.18E-07 |
| <b>Ckap2l</b>             | 1.45E+00  | .         | 1.94E+00      | .         | 9.47E-02 | .        | 8.51E-06 | .        |
| <b>Zfp668</b>             | 1.01E+00  | 1.40E+00  | .             | .         | 1.68E-01 | 1.75E-11 | .        | .        |
| <b>Fndc5</b>              | 1.42E-01  | .         | 1.14E+00      | .         | 6.46E-01 | .        | 8.42E-05 | .        |
| <b>Lrp1</b>               | 4.21E-01  | .         | .             | -1.38E+00 | 2.82E-01 | .        | .        | 3.28E-06 |
| <b>Pfdn4</b>              | -3.70E-01 | .         | .             | 3.28E+00  | 3.10E-01 | .        | .        | 1.40E-36 |
| <b>Fgf3</b>               | -2.84E-01 | .         | .             | 3.69E+00  | 6.31E-01 | .        | .        | 2.38E-21 |
| <b>Cnn2</b>               | 1.67E+00  | .         | 1.64E+00      | .         | 6.17E-02 | .        | 1.13E-05 | .        |
| <b>Rtfdc1</b>             | -2.60E-01 | .         | .             | 1.35E+00  | 7.15E-01 | .        | .        | 4.25E-04 |
| <b>Trnp1</b>              | -3.63E-01 | .         | .             | 2.11E+00  | 6.14E-01 | .        | .        | 3.26E-12 |
| <b>Gopc</b>               | 4.38E-01  | 1.33E+00  | .             | .         | 2.85E-01 | 1.18E-04 | .        | .        |
| <b>Maneal</b>             | 1.09E+00  | .         | .             | -1.13E+00 | 1.30E-01 | .        | .        | 2.14E-07 |
| <b>Cdkn1c</b>             | -2.54E-01 | -1.17E+00 | .             | .         | 6.59E-01 | 3.28E-16 | .        | .        |
| <b>Vash1</b>              | -2.37E-01 | .         | -<br>1.74E+00 | .         | 5.70E-01 | .        | 8.18E-05 | .        |
| <b>Cyth1</b>              | 1.21E+00  | .         | 1.60E+00      | .         | 6.30E-02 | .        | 2.87E-06 | .        |
| <b>Shroom2</b>            | -2.31E-01 | .         | .             | 5.21E+00  | 5.31E-01 | .        | .        | 1.69E-11 |
| <b>Kcnj12</b>             | -2.17E-01 | .         | -<br>1.04E+00 | .         | 6.81E-01 | .        | 8.11E-04 | .        |
| <b>Fancl</b>              | 3.65E-01  | 1.13E+00  | .             | .         | 8.32E-01 | 2.51E-06 | .        | .        |
| <b>Alg8</b>               | 1.84E+00  | .         | 1.51E+00      | .         | 4.38E-02 | .        | 4.60E-04 | .        |
| <b>Mpdu1</b>              | 1.09E+00  | .         | 1.98E+00      | .         | 8.90E-02 | .        | 6.68E-13 | .        |

|                           |           |           |               |           |          |          |          |          |
|---------------------------|-----------|-----------|---------------|-----------|----------|----------|----------|----------|
| <b>Brinp2</b>             | 2.49E-01  | .         | .             | -1.20E+00 | 8.31E-01 | .        | .        | 1.95E-04 |
| <b>Tmtc2</b>              | 7.62E-01  | .         | .             | -1.55E+00 | 1.82E-01 | .        | .        | 1.91E-03 |
| <b>Ric3</b>               | 1.20E-01  | .         | .             | -1.79E+00 | 7.49E-01 | .        | .        | 2.22E-04 |
| <b>Cdc34</b>              | 3.37E-01  | .         | 1.68E+00      | .         | 7.09E-01 | .        | 6.33E-13 | .        |
| <b>Slc30a10</b>           | 1.83E+00  | .         | .             | -1.08E+00 | 5.26E-02 | .        | .        | 1.49E-09 |
| <b>Zic1</b>               | -3.48E-01 | .         | .             | 1.93E+00  | 5.75E-01 | .        | .        | 1.25E-18 |
| <b>Slc39a9</b>            | 2.69E-01  | .         | 1.65E+00      | .         | 7.56E-01 | .        | 5.78E-05 | .        |
| <b>Arl8a</b>              | 3.83E-01  | .         | .             | -1.18E+00 | 3.32E-01 | .        | .        | 1.86E-03 |
| <b>Mid1</b>               | -9.32E-01 | .         | .             | 2.20E+00  | 4.85E-01 | .        | .        | 3.14E-09 |
| <b>Tbc1d22a</b>           | 1.90E-02  | .         | 1.57E+00      | .         | 9.54E-01 | .        | 9.91E-09 | .        |
| <b>Zfp608</b>             | 1.48E-01  | .         | 1.58E+00      | .         | 7.42E-01 | .        | 5.84E-06 | .        |
| <b>Grpr</b>               | -1.45E+00 | .         | .             | 3.74E+00  | 4.32E-02 | .        | .        | 5.30E-23 |
| <b>Asic1</b>              | 9.04E-01  | .         | .             | -1.44E+00 | 4.74E-02 | .        | .        | 8.05E-07 |
| <b>Zbtb22</b>             | 1.49E-01  | .         | 1.91E+00      | .         | 7.28E-01 | .        | 1.94E-06 | .        |
| <b>Timm10</b>             | 1.69E+00  | .         | 3.03E+00      | .         | 7.85E-02 | .        | 1.14E-30 | .        |
| <b>Pid1</b>               | 1.53E-01  | .         | .             | -1.23E+00 | 7.33E-01 | .        | .        | 2.11E-03 |
| <b>Zfp940</b>             | 2.13E+00  | .         | 1.74E+00      | .         | 1.93E-01 | .        | 1.25E-05 | .        |
| <b>Ccnd3</b>              | 7.60E-02  | 1.50E+00  | .             | .         | 9.30E-01 | 1.23E-21 | .        | .        |
| <b>Pianp</b>              | -2.44E-01 | .         | .             | 2.47E+00  | 6.32E-01 | .        | .        | 7.43E-06 |
| <b>Cel</b>                | 9.95E-01  | .         | 1.17E+00      | .         | 1.91E-01 | .        | 8.21E-07 | .        |
| <b>Cwc25</b>              | 5.27E-01  | 1.16E+00  | .             | .         | 5.10E-01 | 4.79E-13 | .        | .        |
| <b>Cacng5</b>             | -5.25E-01 | .         | .             | 3.83E+00  | 4.56E-01 | .        | .        | 3.02E-22 |
| <b>2610306M<br/>01Rik</b> | 6.60E-01  | 1.37E+00  | .             | .         | 3.04E-01 | 9.59E-15 | .        | .        |
| <b>Itga3</b>              | 1.52E-01  | .         | .             | -1.66E+00 | 8.75E-01 | .        | .        | 5.05E-06 |
| <b>A130010J<br/>15Rik</b> | 4.90E-02  | .         | .             | -1.65E+00 | 9.01E-01 | .        | .        | 4.70E-04 |
| <b>Bysl</b>               | 3.80E-02  | .         | 1.62E+00      | .         | 9.30E-01 | .        | 5.61E-12 | .        |
| <b>4933439K<br/>11Rik</b> | -2.10E-01 | .         | .             | 1.52E+00  | 7.45E-01 | .        | .        | 1.95E-15 |
| <b>Naa35</b>              | 4.90E-02  | .         | 2.07E+00      | .         | 9.10E-01 | .        | 3.17E-14 | .        |
| <b>Cdk9</b>               | 3.84E-01  | .         | 2.44E+00      | .         | 3.28E-01 | .        | 7.08E-13 | .        |
| <b>Pitpnm2</b>            | 1.28E-01  | .         | .             | -1.08E+00 | 7.76E-01 | .        | .        | 3.43E-06 |
| <b>Marcks</b>             | -8.00E-03 | .         | -<br>1.34E+00 | .         | 9.85E-01 | .        | 1.48E-05 | .        |
| <b>Gm1564</b>             | 6.66E-01  | -1.38E+00 | .             | -1.30E+00 | 5.60E-01 | 1.75E-10 | .        | 5.52E-03 |
| <b>Sfn</b>                | 1.46E-01  | .         | .             | -1.08E+00 | 8.76E-01 | .        | .        | 2.87E-06 |
| <b>Eci3</b>               | 8.02E-01  | 1.33E+00  | 1.44E+00      | .         | 4.05E-01 | 1.33E-08 | 1.08E-05 | .        |
| <b>Dusp15</b>             | 4.68E-01  | .         | .             | -1.21E+00 | 7.08E-01 | .        | .        | 3.72E-06 |
| <b>Myadm</b>              | 1.09E+00  | .         | 1.20E+00      | .         | 3.81E-02 | .        | 5.36E-03 | .        |
| <b>Paqr9</b>              | 2.80E-01  | .         | .             | -1.11E+00 | 5.18E-01 | .        | .        | 1.38E-11 |
| <b>320001D<br/>21Rik</b>  | 1.60E+00  | .         | 1.59E+00      | .         | 1.14E-01 | .        | 3.79E-07 | .        |
| <b>Suclg2</b>             | 5.10E-02  | .         | .             | -1.79E+00 | 8.80E-01 | .        | .        | 8.18E-05 |
| <b>Alkbh6</b>             | 9.60E-02  | .         | 2.14E+00      | .         | 8.05E-01 | .        | 1.30E-08 | .        |



|                      |           |          |               |           |          |          |          |          |
|----------------------|-----------|----------|---------------|-----------|----------|----------|----------|----------|
| <b>Tmprss12</b>      | 5.65E-01  | .        | .             | -1.45E+00 | 3.61E-01 | .        | .        | 6.86E-04 |
| <b>Slc25a17</b>      | 7.20E-02  | 1.09E+00 | .             | .         | 8.45E-01 | 1.29E-09 | .        | .        |
| <b>Oser1</b>         | 1.54E-01  | 1.01E+00 | .             | .         | 7.88E-01 | 2.29E-06 | .        | .        |
| <b>Calca</b>         | -1.40E-01 | .        | .             | 1.17E+00  | 6.98E-01 | .        | .        | 2.34E-11 |
| <b>Ipmk</b>          | 2.74E-01  | .        | 1.05E+00      | .         | 5.20E-01 | .        | 5.19E-05 | .        |
| <b>Tbrg4</b>         | 1.74E-01  | .        | 1.19E+00      | .         | 8.74E-01 | .        | 2.85E-06 | .        |
| <b>9530080O11Rik</b> | 5.38E-01  | .        | .             | -1.25E+00 | 4.46E-01 | .        | .        | 2.09E-06 |
| <b>Mrgpre</b>        | -1.01E-01 | .        | .             | 1.90E+00  | 9.15E-01 | .        | .        | 1.78E-06 |
| <b>Tcp1</b>          | 9.20E-01  | 1.02E+00 | .             | .         | 3.89E-01 | 1.67E-10 | .        | .        |
| <b>Ddx17</b>         | 1.07E+00  | .        | 1.22E+00      | .         | 1.65E-01 | .        | 9.40E-03 | .        |
| <b>Bhlha15</b>       | 8.87E-01  | .        | .             | -1.30E+00 | 2.72E-01 | .        | .        | 6.48E-08 |
| <b>Phb</b>           | -2.25E-01 | .        | .             | 2.52E+00  | 5.24E-01 | .        | .        | 5.96E-10 |
| <b>S100a1</b>        | 5.60E-02  | 1.22E+00 | .             | .         | 9.34E-01 | 8.69E-13 | .        | .        |
| <b>Lrrc4c</b>        | 2.19E-01  | .        | .             | -1.37E+00 | 7.48E-01 | .        | .        | 2.45E-04 |
| <b>Scn2b</b>         | 1.21E-01  | 1.20E+00 | .             | .         | 7.92E-01 | 2.99E-09 | .        | .        |
| <b>Lepr</b>          | 1.79E-01  | .        | .             | -1.04E+00 | 6.46E-01 | .        | .        | 1.07E-03 |
| <b>Gpx7</b>          | 4.41E-01  | .        | .             | -1.22E+00 | 7.10E-01 | .        | .        | 1.12E-03 |
| <b>Ctxn2</b>         | -4.36E-01 | .        | .             | 2.21E+00  | 2.38E-01 | .        | .        | 3.75E-08 |
| <b>Fscn1</b>         | -1.21E-01 | .        | .             | 1.17E+00  | 7.26E-01 | .        | .        | 1.10E-04 |
| <b>Evi5l</b>         | 7.50E-02  | .        | 1.80E+00      | .         | 9.24E-01 | .        | 1.41E-05 | .        |
| <b>Tmem87a</b>       | 5.14E-01  | 2.34E+00 | .             | .         | 1.80E-01 | 5.43E-19 | .        | .        |
| <b>Akt2</b>          | 1.22E+00  | .        | 1.17E+00      | .         | 6.28E-02 | .        | 6.69E-06 | .        |
| <b>Cdca3</b>         | 3.80E-01  | .        | 2.72E+00      | .         | 7.88E-01 | .        | 2.37E-09 | .        |
| <b>Mon2</b>          | -3.37E-01 | .        | -<br>1.25E+00 | .         | 3.42E-01 | .        | 2.67E-03 | .        |
| <b>Irf9</b>          | 6.84E-01  | .        | 1.49E+00      | .         | 1.56E-01 | .        | 2.96E-06 | .        |
| <b>Slc38a2</b>       | 2.53E-01  | 1.02E+00 | .             | .         | 5.67E-01 | 2.17E-09 | .        | .        |
| <b>Dclre1c</b>       | 1.71E+00  | 2.03E+00 | .             | .         | 1.89E-01 | 3.31E-17 | .        | .        |
| <b>Tfb2m</b>         | 2.86E-01  | .        | 1.97E+00      | .         | 5.41E-01 | .        | 6.95E-09 | .        |
| <b>Esrra</b>         | 2.55E-01  | .        | 1.27E+00      | .         | 4.24E-01 | .        | 3.52E-06 | .        |
| <b>Cdh26</b>         | -2.09E+00 | .        | .             | 1.30E+00  | 4.40E-02 | .        | .        | 1.35E-08 |
| <b>Lpin2</b>         | 1.09E-01  | 1.00E+00 | .             | .         | 7.91E-01 | 6.41E-04 | .        | .        |
| <b>Ormdl2</b>        | -8.85E-01 | .        | -<br>1.25E+00 | .         | 3.33E-01 | .        | 2.70E-03 | .        |
| <b>Ptpre</b>         | 4.22E-01  | .        | .             | -1.13E+00 | 2.71E-01 | .        | .        | 1.45E-04 |
| <b>Ccrl2</b>         | 7.86E-01  | 1.13E+00 | .             | .         | 4.28E-01 | 1.27E-10 | .        | .        |
| <b>Thbs2</b>         | 1.62E-01  | .        | 1.11E+00      | .         | 7.32E-01 | .        | 4.90E-04 | .        |
| <b>Rimk1a</b>        | 2.35E-01  | .        | .             | -1.78E+00 | 6.65E-01 | .        | .        | 6.47E-06 |
| <b>Nr1h3</b>         | 2.37E-01  | .        | .             | -1.18E+00 | 6.62E-01 | .        | .        | 1.91E-04 |
| <b>Grik3</b>         | 5.59E-01  | .        | 1.06E+00      | .         | 3.42E-01 | .        | 1.52E-03 | .        |
| <b>D430041D05Rik</b> | 5.38E-01  | .        | .             | -1.27E+00 | 1.84E-01 | .        | .        | 1.12E-07 |
| <b>Ddb2</b>          | 2.24E+00  | .        | 2.40E+00      | .         | 7.65E-02 | .        | 3.31E-06 | .        |
| <b>Rgs19</b>         | 2.20E-01  | .        | .             | -1.05E+00 | 7.94E-01 | .        | .        | 3.12E-06 |

|                           |           |           |          |           |          |          |          |          |
|---------------------------|-----------|-----------|----------|-----------|----------|----------|----------|----------|
| <b>Serpinh1</b>           | 7.71E-01  | .         | 1.02E+00 | .         | 3.86E-01 | .        | 1.87E-05 | .        |
| <b>Mmp24</b>              | 6.24E-01  | .         | .        | -1.05E+00 | 3.22E-01 | .        | .        | 4.48E-07 |
| <b>Eme1</b>               | 4.20E-02  | 1.35E+00  | .        | .         | 9.59E-01 | 1.74E-07 | .        | .        |
| <b>Vac14</b>              | 1.66E-01  | .         | 1.88E+00 | .         | 7.48E-01 | .        | 1.15E-12 | .        |
| <b>Clic4</b>              | -9.00E-02 | .         | 1.47E+00 | 1.06E+00  | 7.90E-01 | .        | 5.98E-09 | 2.45E-03 |
| <b>Spn</b>                | 1.37E-01  | .         | 1.08E+00 | .         | 7.73E-01 | .        | 9.04E-06 | .        |
| <b>Sp7</b>                | 2.03E+00  | .         | 1.11E+00 | .         | 4.18E-02 | .        | 1.98E-04 | .        |
| <b>Cxxc4</b>              | 8.30E-02  | .         | .        | -2.82E+00 | 8.37E-01 | .        | .        | 7.43E-06 |
| <b>Ankrd34a</b>           | 9.28E-01  | .         | .        | -1.29E+00 | 1.58E-01 | .        | .        | 3.45E-08 |
| <b>Slc12a5</b>            | 4.10E-02  | .         | .        | -1.07E+00 | 9.20E-01 | .        | .        | 5.63E-04 |
| <b>Tet2</b>               | 3.30E-02  | 1.92E+00  | 1.25E+00 | .         | 9.51E-01 | 6.17E-14 | 2.13E-08 | .        |
| <b>Prmt8</b>              | -1.11E+00 | .         | .        | 2.54E+00  | 2.52E-01 | .        | .        | 2.58E-07 |
| <b>Nalcn</b>              | 6.09E-01  | .         | .        | -1.43E+00 | 2.46E-01 | .        | .        | 1.18E-05 |
| <b>Crip1</b>              | 9.53E-01  | .         | .        | -1.22E+00 | 4.84E-01 | .        | .        | 1.56E-03 |
| <b>Hunk</b>               | -4.40E-02 | .         | .        | 3.56E+00  | 9.39E-01 | .        | .        | 1.32E-17 |
| <b>Ptbp1</b>              | 6.59E-01  | .         | 1.39E+00 | .         | 4.61E-01 | .        | 9.33E-09 | .        |
| <b>Fbxl5</b>              | -4.34E-01 | -1.05E+00 | .        | .         | 4.43E-01 | 1.61E-03 | .        | .        |
| <b>Adrbk2</b>             | 1.23E+00  | .         | .        | -1.04E+00 | 8.23E-02 | .        | .        | 5.22E-04 |
| <b>Zc3hc1</b>             | 3.00E-02  | 1.91E+00  | .        | .         | 9.59E-01 | 8.85E-14 | .        | .        |
| <b>Myo9a</b>              | 1.30E-02  | .         | 1.69E+00 | .         | 9.74E-01 | .        | 4.77E-07 | .        |
| <b>Raver2</b>             | -4.93E-01 | .         | .        | 1.80E+00  | 5.84E-01 | .        | .        | 2.72E-04 |
| <b>Asprv1</b>             | 2.66E-01  | .         | .        | -1.37E+00 | 8.63E-01 | .        | .        | 1.42E-04 |
| <b>Ak4</b>                | 4.48E-01  | .         | .        | -1.80E+00 | 3.28E-01 | .        | .        | 1.34E-08 |
| <b>Wdr81</b>              | 2.11E+00  | .         | 2.49E+00 | .         | 2.35E-02 | .        | 5.05E-09 | .        |
| <b>Figl2</b>              | -1.03E-01 | .         | .        | 1.15E+00  | 8.09E-01 | .        | .        | 3.20E-11 |
| <b>Btbd2</b>              | 2.37E-01  | .         | 1.41E+00 | .         | 6.49E-01 | .        | 1.04E-06 | .        |
| <b>Mrpl27</b>             | 8.96E-01  | 1.35E+00  | .        | .         | 3.08E-01 | 1.74E-07 | .        | .        |
| <b>Fastkd5</b>            | 6.73E-01  | .         | .        | -1.28E+00 | 4.32E-01 | .        | .        | 1.41E-21 |
| <b>Nyap1</b>              | 1.35E+00  | .         | .        | -1.28E+00 | 8.68E-02 | .        | .        | 9.28E-05 |
| <b>Wscd2</b>              | 4.23E-01  | .         | .        | -1.09E+00 | 4.21E-01 | .        | .        | 1.21E-04 |
| <b>Kifc3</b>              | 6.67E-01  | .         | .        | -1.29E+00 | 4.09E-01 | .        | .        | 6.61E-03 |
| <b>Adap1</b>              | 3.75E-01  | .         | .        | -1.94E+00 | 6.04E-01 | .        | .        | 2.49E-03 |
| <b>Gm166</b>              | 6.86E-01  | .         | 1.12E+00 | .         | 3.82E-01 | .        | 1.16E-04 | .        |
| <b>C330006A<br/>16Rik</b> | 1.70E-01  | .         | 1.49E+00 | .         | 8.12E-01 | .        | 2.77E-05 | .        |
| <b>Ahdc1</b>              | 8.90E-02  | .         | .        | -1.37E+00 | 8.57E-01 | .        | .        | 2.17E-04 |
| <b>Stampb</b>             | 7.70E-02  | .         | 1.51E+00 | .         | 8.32E-01 | .        | 4.70E-07 | .        |
| <b>Dner</b>               | 3.97E-01  | .         | .        | -1.18E+00 | 4.26E-01 | .        | .        | 8.45E-09 |
| <b>Mrpl32</b>             | 8.29E-01  | 2.04E+00  | .        | .         | 4.38E-01 | 3.81E-09 | .        | .        |
| <b>Alkbh4</b>             | 4.30E-01  | .         | 1.22E+00 | .         | 4.17E-01 | .        | 1.86E-03 | .        |
| <b>Med18</b>              | 8.60E-01  | 1.20E+00  | .        | .         | 5.68E-01 | 7.26E-10 | .        | .        |
| <b>Ppif</b>               | 8.10E-02  | .         | 1.58E+00 | .         | 8.43E-01 | .        | 2.49E-06 | .        |
| <b>Rbm12b2</b>            | 1.75E-01  | 1.82E+00  | .        | .         | 6.63E-01 | 3.05E-15 | .        | .        |

|                      |           |          |               |           |          |          |          |          |
|----------------------|-----------|----------|---------------|-----------|----------|----------|----------|----------|
| <b>Foxp1</b>         | 3.42E-01  | .        | 1.67E+00      | .         | 4.83E-01 | .        | 1.30E-05 | .        |
| <b>Cntd1</b>         | 1.47E-01  | .        | .             | -1.17E+00 | 7.91E-01 | .        | .        | 3.18E-05 |
| <b>Robo3</b>         | 1.02E-01  | .        | 1.21E+00      | .         | 9.02E-01 | .        | 2.77E-03 | .        |
| <b>Trim67</b>        | 2.81E-01  | .        | .             | -1.12E+00 | 5.23E-01 | .        | .        | 5.07E-19 |
| <b>Gm16701</b>       | 1.42E+00  | .        | .             | -1.25E+00 | 1.02E-01 | .        | .        | 6.99E-06 |
| <b>Rnf152</b>        | 2.73E-01  | .        | .             | -1.27E+00 | 4.68E-01 | .        | .        | 1.88E-07 |
| <b>Fam83d</b>        | 1.32E+00  | .        | 1.13E+00      | .         | 1.37E-01 | .        | 1.03E-05 | .        |
| <b>Il4ra</b>         | -8.52E-01 | .        | .             | 1.30E+00  | 3.36E-01 | .        | .        | 9.20E-10 |
| <b>6530411M01Rik</b> | 1.79E-01  | .        | 2.26E+00      | .         | 8.17E-01 | .        | 6.23E-08 | .        |
| <b>Bcl6b</b>         | 1.52E-01  | 1.00E+00 | .             | .         | 8.40E-01 | 1.06E-08 | .        | .        |
| <b>Zfp58</b>         | 4.58E-01  | 1.45E+00 | .             | .         | 6.77E-01 | 1.34E-16 | .        | .        |
| <b>Ddx10</b>         | 4.31E-01  | .        | 1.62E+00      | .         | 4.98E-01 | .        | 1.02E-04 | .        |
| <b>Sp2</b>           | 2.63E+00  | .        | .             | -1.42E+00 | 1.37E-02 | .        | .        | 5.58E-05 |
| <b>Lrp8</b>          | 3.49E-01  | .        | .             | -1.14E+00 | 4.48E-01 | .        | .        | 1.45E-06 |
| <b>Gltp</b>          | 7.18E-01  | 2.12E+00 | .             | .         | 3.94E-01 | 1.42E-29 | .        | .        |
| <b>Zfp286</b>        | 6.70E-02  | 1.18E+00 | .             | .         | 9.20E-01 | 2.55E-12 | .        | .        |
| <b>Sarnp</b>         | -2.61E-01 | .        | -<br>1.25E+00 | .         | 4.47E-01 | .        | 2.70E-03 | .        |
| <b>Star</b>          | 1.20E+00  | .        | 1.51E+00      | .         | 1.07E-01 | .        | 1.86E-06 | .        |
| <b>Phf21a</b>        | 1.45E+00  | 1.07E+00 | .             | .         | 6.38E-02 | 1.13E-05 | .        | .        |
| <b>Scara5</b>        | 1.02E+00  | .        | 1.39E+00      | .         | 2.21E-01 | .        | 2.34E-04 | .        |
| <b>Ncapg2</b>        | 4.75E-01  | .        | 1.05E+00      | .         | 4.24E-01 | .        | 2.04E-04 | .        |
| <b>Prex1</b>         | -3.38E-01 | .        | .             | 1.44E+00  | 5.16E-01 | .        | .        | 6.38E-08 |
| <b>Ppfibp1</b>       | 6.04E-01  | .        | .             | -1.13E+00 | 5.54E-01 | .        | .        | 7.02E-03 |
| <b>Pde1b</b>         | 2.78E-01  | .        | .             | -1.10E+00 | 8.36E-01 | .        | .        | 4.44E-09 |

**Table S5:** Gene Ontology enrichments for 145 genes in the active circuit after network analysis.

GO terms are scored by EnrichR combined score.

| Category                                                                                                    | Term                                                                       | Overlap                                                     | Combined Score | Genes                                                                                                                               |                                                                                                                   |
|-------------------------------------------------------------------------------------------------------------|----------------------------------------------------------------------------|-------------------------------------------------------------|----------------|-------------------------------------------------------------------------------------------------------------------------------------|-------------------------------------------------------------------------------------------------------------------|
| <b>GO Biological Process</b>                                                                                | regulation of dendritic spine morphogenesis (GO:0061001)                   | 4/21                                                        | 1.133703336    | EFNA1 SRCIN1 SHANK3 LRP8                                                                                                            |                                                                                                                   |
|                                                                                                             | negative regulation of cellular component organization (GO:0051129)        | 21/474                                                      | 1.097462581    | RTN4R PSMD10 PID1 DMTN ITGA3 SHROOM2 NR1H3 SEMA3F MID1 CNN2 EFNA1 RPS6KA2 TMSB4X ARHGDIS MYADM PPIF PACSIN3 GOPC EVI5L EPHB2 SHANK3 |                                                                                                                   |
|                                                                                                             | actin cytoskeleton organization (GO:0030036)                               | 14/253                                                      | 1.02254391     | CAP1 MON2 DMTN IQSEC2 IQSEC1 ARHGAP26 CNN3 FOXP1 CNN2 ALKBH4 NUA2 DAAM2 TMSB4X FSCN1                                                |                                                                                                                   |
|                                                                                                             | calcium-mediated signaling using intracellular calcium source (GO:0035584) | 3/13                                                        | 1.020641134    | FIS1 GPR143 DMTN                                                                                                                    |                                                                                                                   |
|                                                                                                             | cell-cell junction maintenance (GO:0045217)                                | 3/9                                                         | 1.007143753    | SHROOM2 MYADM KIFC3                                                                                                                 |                                                                                                                   |
|                                                                                                             | terpenoid metabolic process (GO:0006721)                                   | 8/97                                                        | 0.992727145    | AKR1B10 LRP1 STAR AWAT2 RBP1 PDE3A LRP8 GPC6                                                                                        |                                                                                                                   |
|                                                                                                             | diterpenoid metabolic process (GO:0016101)                                 | 8/87                                                        | 0.986640404    | AKR1B10 LRP1 STAR AWAT2 RBP1 PDE3A LRP8 GPC6                                                                                        |                                                                                                                   |
|                                                                                                             | cellular response to metal ion (GO:0071248)                                | 8/99                                                        | 0.979017033    | CLIC4 DMTN STAR SLC11A2 PPIF PPARG AQP2 JUNB                                                                                        |                                                                                                                   |
|                                                                                                             | cellular response to antibiotic (GO:0071236)                               | 3/13                                                        | 0.970089779    | XBP1 STAR CRIP1                                                                                                                     |                                                                                                                   |
|                                                                                                             | cell junction maintenance (GO:0034331)                                     | 3/11                                                        | 0.938976983    | SHROOM2 MYADM KIFC3                                                                                                                 |                                                                                                                   |
|                                                                                                             | regulation of cell morphogenesis involved in differentiation (GO:0010769)  | 13/248                                                      | 0.892376823    | RTN4R DMTN SEMA3F LRP8 SRCIN1 EFNA1 PREX1 ARHGDIS CHN1 MYADM LRRC4C EPHB2 SHANK3                                                    |                                                                                                                   |
|                                                                                                             | <b>GO Molecular Function</b>                                               | ARF guanyl-nucleotide exchange factor activity (GO:0005086) | 4/19           | 4.979041721                                                                                                                         | MON2 IQSEC2 IQSEC1 CYTH1                                                                                          |
|                                                                                                             |                                                                            | actin binding (GO:0003779)                                  | 19/386         | 4.623746741                                                                                                                         | CAP1 DMTN GMFG PRKCE SHROOM2 SLC4A1 AQP2 MYO9A CNN3 CNN2 MARCKS ALKBH4 DAAM2 HOOK1 TMSB4X FSCN1 SHANK3 MSRB1 PLS1 |
| sodium channel activity (GO:0005272)                                                                        |                                                                            | 5/37                                                        | 4.281021029    | SCNN1B SHROOM2 NALCN SCN2B ASIC1                                                                                                    |                                                                                                                   |
| ligand-gated sodium channel activity (GO:0015280)                                                           |                                                                            | 3/10                                                        | 3.904128246    | SCNN1B SHROOM2 ASIC1                                                                                                                |                                                                                                                   |
| ligand-activated sequence-specific DNA binding RNA polymerase II transcription factor activity (GO:0004879) |                                                                            | 5/50                                                        | 2.509575238    | ESRRA NR5A2 NR1H3 PPARG BRD8                                                                                                        |                                                                                                                   |
| direct ligand regulated sequence-specific DNA binding transcription factor activity (GO:0098531)            |                                                                            | 5/50                                                        | 2.49141456     | ESRRA NR5A2 NR1H3 PPARG BRD8                                                                                                        |                                                                                                                   |
| mRNA 3'-UTR binding (GO:0003730)                                                                            |                                                                            | 4/35                                                        | 1.82862356     | CPEB1 ELAVL4 RNPS1 ELAVL2                                                                                                           |                                                                                                                   |
| RNA helicase activity (GO:0003724)                                                                          |                                                                            | 3/29                                                        | 1.447110189    | DDX17 DHX8 DDX10                                                                                                                    |                                                                                                                   |

|                              |                                                           |         |             |                                                                                                                                                                                    |
|------------------------------|-----------------------------------------------------------|---------|-------------|------------------------------------------------------------------------------------------------------------------------------------------------------------------------------------|
|                              | GTPase regulator activity (GO:0030695)                    | 13/310  | 1.397224764 | GPSM1 RGS19 ARHGAP26 ADAP1 MYO9A RASGRP3 PREX1 ARHGDIS CHN1 GOPC CHML EVI5L TBC1D22A                                                                                               |
|                              | nucleoside-triphosphatase regulator activity (GO:0060589) | 13/330  | 1.385629816 | GPSM1 RGS19 ARHGAP26 ADAP1 MYO9A RASGRP3 PREX1 ARHGDIS CHN1 GOPC CHML EVI5L TBC1D22A                                                                                               |
|                              | small GTPase regulator activity (GO:0005083)              | 9/195   | 1.358239818 | GPSM1 PREX1 ARHGDIS GOPC EVI5L ARHGAP26 ADAP1 TBC1D22A RASGRP3                                                                                                                     |
| <b>GO Cellular Component</b> | cortical actin cytoskeleton (GO:0030864)                  | 3/24    | 0.900972322 | CAP1 SHROOM2 MYADM                                                                                                                                                                 |
|                              | synapse part (GO:0044456)                                 | 15/395  | 0.829575204 | CALCA CLSTN3 GRIK3 FAIM2 LRP8 SRCIN1 CPEB1 PPFIBP1 GOPC LRRC4C PPFIA4 GABRD SHANK3 CBLN1 CACNG5                                                                                    |
|                              | postsynaptic membrane (GO:0045211)                        | 11/195  | 0.826774805 | CPEB1 CLSTN3 GRIK3 GOPC FAIM2 LRRC4C GABRD SRCIN1 SHANK3 CBLN1 CACNG5                                                                                                              |
|                              | synaptic membrane (GO:0097060)                            | 11/228  | 0.820510025 | CPEB1 CLSTN3 GRIK3 GOPC FAIM2 LRRC4C GABRD SRCIN1 SHANK3 CBLN1 CACNG5                                                                                                              |
|                              | cortical cytoskeleton (GO:0030863)                        | 5/50    | 0.810816311 | CAP1 DMTN MYADM SHROOM2 SLC4A1                                                                                                                                                     |
|                              | nucleoplasm (GO:0005654)                                  | 30/1051 | 0.739154106 | PSMD10 GTF2A2 NCAPG2 PHB PHF21A PTBP1 RPS6KA2 CSTF1 BRD8 JUNB ESRRA CENPU XBP1 FANCL IPMK NR1H3 VRK1 SMAD5 DDB2 CDK9 RAD51B CDK8 NR5A2 MAPKAPK3 MED20 RNPS1 PPARG KIF20A IRF9 MCM2 |
|                              | occluding junction (GO:0070160)                           | 6/108   | 0.736582186 | CLDN15 MAGI3 MARVELD3 SHROOM2 CLDN2 CYTH1                                                                                                                                          |
|                              | apical part of cell (GO:0045177)                          | 5/87    | 0.729870135 | CLIC4 FZD7 SLC11A2 VASH1 BYSL                                                                                                                                                      |
|                              | tight junction (GO:0005923)                               | 6/108   | 0.729224892 | CLDN15 MAGI3 MARVELD3 SHROOM2 CLDN2 CYTH1                                                                                                                                          |
|                              | neuronal cell body (GO:0043025)                           | 10/270  | 0.711029059 | CALCA SLC12A5 STAR LRP1 RHEB PDE1B DNER SHROOM2 EPHB2 LRP8                                                                                                                         |
|                              | clathrin-coated vesicle (GO:0030136)                      | 4/57    | 0.699084763 | RGS19 LRP1 GOPC AQP2                                                                                                                                                               |

**Table S6:** Summary statistics of SAGE sequencing. For each sample we report the number of mapped tags, the number of total sequencing tags and the percentage of aligned tags

| Samples      | Mapped Tags       | Total Sequences    | Mapping %    |
|--------------|-------------------|--------------------|--------------|
| <b>1CT</b>   | 10,204,508        | 53,290,259         | 19.15        |
| <b>2CT</b>   | 4,170,458         | 31,517,774         | 13.23        |
| <b>3CT</b>   | 7,035,817         | 50,823,964         | 13.84        |
| <b>4CT</b>   | 4,446,023         | 32,505,049         | 13.68        |
| <b>5CT</b>   | 5,753,513         | 34,003,519         | 16.92        |
| <b>1RCF</b>  | 1,379,561         | 31,147,342         | 4.43         |
| <b>2RCF</b>  | 6,945,345         | 40,705,489         | 17.06        |
| <b>3RCF</b>  | 1,581,025         | 35,345,749         | 4.47         |
| <b>4RCF</b>  | 5,168,060         | 37,911,879         | 13.63        |
| <b>5RCF</b>  | 5,218,794         | 45,043,440         | 11.59        |
| <b>Total</b> | <b>51,903,104</b> | <b>392,294,464</b> | <b>13.23</b> |
